# Supplementary material for: Unstrained C–C bond activation and directed fluorination through photocatalytically-generated radical cations
Source: PubMed Central journal article supplement — Chem Sci. 2015 Jun 23;6(9):5225–9. doi: 10.1039/c5sc01973g (PMC5669245; doi:10.1039/c5sc01973g), 2015-06-23
Supplement: SC-006-C5SC01973G-s001.pdf [file SC-006-C5SC01973G-s001.pdf]

Supporting Information

**Unstrained C-C Bond Activation and Directed Fluorination through  
Photocatalytically-Generated Radical Cations**

**Cody Ross Pitts, Michelle Sheanne Bloom, Desta Doro Bume, Qinze Arthur Zhang,  
and Thomas Lectka\***

*Department of Chemistry*

*Johns Hopkins University*

*3400 North Charles Street, Baltimore, MD 21218*

**Contents:**

**General:** [S:2]

**Representative procedures:** [S:3]

**Characterization data:**

6-fluoro-6-phenyl-hexanoic acid (1): [S:4, S:10-S:12]

methyl 6-fluoro-6-phenylhexanoate (2): [S:4, S:13-S:15]

6-fluoro-6-phenylhexan-1-ol (3): [S:4, S:16-S:18]

6-fluoro-6-(*p*-tolyl)hexanoic acid (4): [S:5, S:19-S:21]

6-(4-(*tert*-butyl)phenyl)-6-fluorohexanoic acid (5): [S:5, S:22-S:24]

6-fluoro-6-(4-fluoro)phenyl-hexanoic acid (6): [S:5, S:25-S:27]

6-(4-chlorophenyl)-6-fluorohexanoic acid (7): [S:6, S:28-S:30]

6-(2-bromophenyl)-6-fluorohexanoic acid (8): [S:6, S:31-S:33]

6-fluoro-6-(naphthalen-1-yl)hexanoic acid (9): [S:6, S:34-S:36]

6-fluoro-6-(4-(2-phenyl-1,3-dioxolan-2-yl)phenyl)hexanoic acid (10): [S:7, S:37-S:39]

6-(4-acetylphenyl)-6-fluorohexanoic acid (11): [S:7, S:40-S:42]

2-(3-fluoro-3-phenylpropyl)benzoic acid (12): [S:7, S:43-S:45]

*cis*-2-(3-fluoro-3-phenylpropyl)cyclohexane-1-carboxylic acid (13): [S:8, S:46-S:48]

6-fluoro-2,6-diphenylhexanoic acid (14): [S:8, S:49-S:51]

6-fluoro-1,6-diphenyl-hexanone (15): [S:8, S:52-S:54]

5-fluoro-5-phenylpentanoic acid (17): [S:9, S:55-S:57]

7-fluoro-7-phenylheptanoic acid (18): [S:9, S:58-S:60]

8-fluoro-8-phenyloctanoic acid (19): [S:9, S:61-S:63]

12-fluoro-12-phenyldodecanoic acid (20): [S:9, S:64-S:66]

**Intermolecular Competition Experiments:** [S:67-S:69]

**Computational Data:** [S:70-S:79]

**Table of calculated C-C bond lengths in radical cation geometries:** [S:80]

**General.** Unless otherwise stated, all reactions were carried out under strictly anhydrous conditions under N<sub>2</sub> atmosphere. All solvents were dried and distilled by standard methods. All <sup>1</sup>H and <sup>13</sup>C NMR spectra were acquired on a 400 MHz NMR spectrometer in CDCl<sub>3</sub> or CD<sub>3</sub>OD, and <sup>19</sup>F spectra were acquired on a 300 MHz NMR spectrometer in CDCl<sub>3</sub>, CD<sub>3</sub>OD, or CD<sub>3</sub>CN. The <sup>1</sup>H, <sup>13</sup>C, and <sup>19</sup>F NMR chemical shifts are given in parts per million (δ) with respect to an internal tetramethylsilane (TMS, δ = 0.00 ppm) standard and/or 3-chlorobenzotrifluoride (δ = -64.2 ppm relative to CFC<sub>3</sub>).<sup>1</sup> NMR data are reported in the following format: chemical shift (integration, multiplicity (s = singlet, d = doublet, t = triplet, q = quartet, m = multiplet), coupling constants (Hz)). IR data were obtained using an ATR-IR instrument. The 2-aryl ketone precursors for compounds **1-6**, **9-14**, and **18-20** were synthesized using the Pd-catalyzed 2-arylation procedure by Kawatsura and Hartwig;<sup>2</sup> the precursors for compounds **7**, **15**, and **17** were synthesized using standard Grignard reactions<sup>3</sup> followed by PCC oxidations;<sup>4</sup> the precursor for compound **8** was synthesized using the Pd-catalyzed 2-arylation procedure by Willis, Taylor, and Gillmore.<sup>5</sup> The ethylene glycol acetals were synthesized according to a general literature procedure.<sup>6</sup> Characterization data for **16** is consistent with literature.<sup>7</sup> Spectral data were analyzed with the ACD/NMR Processor Academic Edition<sup>8</sup> and processed on Bruker software. The Gaussian '09 package was used for all calculations.<sup>9</sup> Geometry optimizations were performed at the B3PW91/6-311++G\*\* level of theory employing the default MeCN solvent continuum.

### Representative Procedures.

Selectfluor (195 mg, 0.55 mmol, 2.2 equiv.), 9-fluorenone (9 mg, 0.25 mmol, 0.2 equiv.), and the substrate (0.25 mmol, 1.0 equiv.) were added to an oven-dried microwave vial equipped with a stir bar. The microwave vial was sealed via crimper with a cap w/ septum; it was evacuated and refilled with N<sub>2</sub> multiple times. Anhydrous CH<sub>3</sub>CN (3 mL) was then added to the vial via syringe under N<sub>2</sub> atmosphere. The reaction mixture was stirred in a Rayonet reactor and irradiated at 300 nm for 12 h.

*To obtain carboxylic acid:* The reaction mixture was diluted with approximately equal parts H<sub>2</sub>O. LiOH·H<sub>2</sub>O (63 mg, 1.25 mmol, 5.0 equiv.) was added, and the reaction mixture was stirred for 25 min. open to air. The mixture was acidified with 1 M HCl (pH ~2) and extracted into CH<sub>2</sub>Cl<sub>2</sub>. The combined organic layers were dried with MgSO<sub>4</sub>, filtered through Celite, and concentrated. Products typically columned on Florisil,

<sup>1</sup> D. Naumann and J. Kischkewitz, *J. Fluorine Chem.*, 1990, **47**, 283-299.

<sup>2</sup> M. Kawatsura and J. F. Hartwig, *J. Am. Chem. Soc.*, 1999, **121**, 1473-1478.

<sup>3</sup> a) G. F. Woods and F. Scotti, *J. Org. Chem.*, 1961, **26**, 312-318. b) E. Pinard, S. M. Ceccarelli, H. Stalder, and D. Alberati, *Bioorg. Med. Chem. Lett.*, 2006, **16**, 349-352.

<sup>4</sup> M. Ceylan, S. Yalcin, H. Secen, Y. Suetbeyaz, and M. Balci, *J. Chem. Res-S.*, 2003, **1**, 21-23.

<sup>5</sup> M. C. Willis, D. Taylor, and A. T. Gillmore, *Tetrahedron*, 2006, **62**, 11513-11520.

<sup>6</sup> C. Djerassi, G. von Mutzenbecher, J. Fajkos, D. H. Williams, and H. Budzikiewicz, *J. Am. Chem. Soc.*, 1965, **87**, 817-826.

<sup>7</sup> J-B. Xia, C. Zhu, and C. Chen, *J. Am. Chem. Soc.*, 2013, **135**, 17494-17500.

<sup>8</sup> ACD/NMR Processor Academic Edition, version 12.0, Advanced Chemistry Development, Inc., Toronto, ON, Canada, [www.acdlabs.com](http://www.acdlabs.com), 2012.

<sup>9</sup> A. Huczynski, J. Rutkowski, and B. Brzezinski, *Struct. Chem.*, 2011, **22**, 627-634.

eluting with 5:94:1 EtOAc:Hexanes:AcOH. (Do not column on silica – it promotes dehydrofluorination.) Better results can be achieved by flushing the loaded column with a few column volumes of EtOAc:Hexanes before acidifying it. Analytical purity can be obtained via subsequent gradient C18 column chromatography, eluting with MeCN/H<sub>2</sub>O.

*To obtain methyl ester:* The reaction mixture was diluted with approximately equal parts H<sub>2</sub>O. LiOMe (47 mg, 1.25 mmol, 5.0 equiv.) was added, and the reaction mixture was stirred for 25 min. open to air. The mixture was extracted into CH<sub>2</sub>Cl<sub>2</sub>. The combined organic layers were dried with MgSO<sub>4</sub>, filtered through Celite, and concentrated. Products typically columned on Florisil, eluting with 5:95 EtOAc:Hexanes. (Do not column on silica – it promotes dehydrofluorination.) Analytical purity can be obtained via subsequent gradient C18 column chromatography, eluting with MeCN/H<sub>2</sub>O, or via flash chromatography on silica gel, eluting with 10:90 EtOAc:Toluene.

*To obtain alcohol:* The reaction mixture was concentrated and dissolved in 10 mL anhydrous THF under N<sub>2</sub> atmosphere. After cooling to 0 °C, LiAlH<sub>4</sub> (57 mg, 1.50 mmol, 6.0 equiv.) was added to the reaction mixture; the mixture slowly warmed to rt and was stirred vigorously for 1 h. The reaction was quenched and worked up via the standard Fieser method. Products typically columned on Florisil, eluting with 5:95 EtOAc:Hexanes. (Do not column on silica – it promotes dehydrofluorination.) Analytical purity can be obtained via subsequent gradient C18 column chromatography, eluting with MeCN/H<sub>2</sub>O.

*To obtain ketone/fragmentation product:* The reaction mixture was diluted with approximately equal parts H<sub>2</sub>O and was stirred for 25 min. open to air. The mixture was extracted into CH<sub>2</sub>Cl<sub>2</sub>. The combined organic layers were dried with MgSO<sub>4</sub>, filtered through Celite, and concentrated. Products typically columned on Florisil, eluting with 5:95 EtOAc:Hexanes. (Do not column on silica – it promotes dehydrofluorination.) Analytical purity can be obtained via subsequent gradient C18 column chromatography, eluting with MeCN/H<sub>2</sub>O.

*Gram Scale Example:* Selectfluor (3.90 g, 11.0 mmol, 2.2 equiv.), 9-fluorenone (0.180 g, 1.0 mmol, 0.2 equiv.), and 6-phenyl-1,4-dioxaspiro[4.5]decane (1.09 g, 5.0 mmol, 1.0 equiv.) were added to an oven-dried round bottom flask equipped with a stir bar. The flask was evacuated and refilled with N<sub>2</sub> multiple times. Anhydrous CH<sub>3</sub>CN (60 mL) was then added to the flask via syringe under N<sub>2</sub> atmosphere. The reaction mixture was stirred in a Rayonet reactor and irradiated at 300 nm for 12 h. The reaction was worked up to obtain 6-fluoro-6-phenyl-hexanoic acid as outlined above in 54% yield (568 mg).

## Compound Characterization

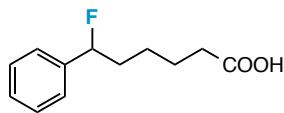

6-fluoro-6-phenylhexanoic acid (**1**). 60% yield. Clear oil.  $\nu_{\max}/\text{cm}^{-1}$  3300-2500 (COOH) and 1708 (CO).  $^1\text{H}$  NMR ( $\text{CDCl}_3$ ): 11.26 (1H, br s), 7.38-7.30 (5H, m), 5.42 (1H, ddd,  $J = 47.9, 8.0, 4.9$  Hz), 2.36 (2H, t,  $J = 7.4$  Hz), 2.05-1.92 (1H, m), 1.91-1.75 (1H, m), 1.68 (2H, quint,  $J = 7.5$  Hz), 1.59-1.48 (1H, m), 1.48-1.37 (1H, m);  $^{13}\text{C}$  NMR ( $\text{CDCl}_3$ ): 180.2, 140.2 (d,  $J = 19.9$  Hz), 128.4, 128.2, 125.5 (d,  $J = 7.4$  Hz), 94.3 (d,  $J = 170.3$  Hz), 36.8 (d,  $J = 23.6$  Hz), 33.9, 24.5 (d,  $J = 4.4$  Hz), 24.3;  $^{19}\text{F}$  NMR ( $\text{CDCl}_3$ ): -174.31 (1F, ddd,  $J = 47.0, 28.7, 17.2$  Hz).

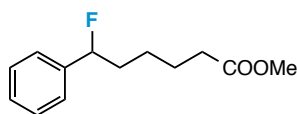

methyl 6-fluoro-6-phenylhexanoate (**2**). 59% yield. Clear oil.  $\nu_{\max}/\text{cm}^{-1}$  1733 (CO).  $^1\text{H}$  NMR ( $\text{CDCl}_3$ ): 7.41-7.29 (5H, m), 5.42 (1H, ddd,  $J = 47.8, 8.0, 4.8$  Hz), 3.66 (3H, s), 2.32 (2H, t,  $J = 7.5$  Hz), 2.09-1.92 (1H, m), 1.76-1.74 (1H, m), 1.72-1.64 (2H, m), 1.56-1.36 (2H, m);  $^{13}\text{C}$  NMR ( $\text{CDCl}_3$ ): 173.9, 140.4, 140.2, 128.4, 128.23, 128.21, 125.51, 125.44, 94.3 (d,  $J = 171$  Hz), 51.5, 37.0, 36.7, 33.9, 24.7, 24.6;  $^{19}\text{F}$  NMR ( $\text{CDCl}_3$ ): -174.24 (1F, ddd,  $J = 47.0, 27.5, 16.1$  Hz).

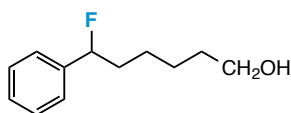

6-fluoro-6-phenylhexan-1-ol (**3**). 55% yield. Clear oil.  $\nu_{\max}/\text{cm}^{-1}$  3381 (OH).  $^1\text{H}$  NMR ( $\text{CDCl}_3$ ): 7.40-7.35 (2H, m), 7.34-7.30 (3H, m), 5.43 (1H, ddd,  $J = 47.7, 8.0, 4.9$  Hz), 3.64 (2H, m), 2.06-1.91 (1H, m), 1.90-1.75 (1H, m), 1.61-1.47 (3H, m), 1.47-1.37 (3H, m);  $^{13}\text{C}$  NMR ( $\text{CDCl}_3$ ): 140.6, 140.4, 128.4, 128.18, 128.17, 125.53, 125.46, 94.5 (d,  $J = 170.3$  Hz), 62.8, 37.3, 37.0, 32.6, 25.5, 24.90, 24.86;  $^{19}\text{F}$  NMR ( $\text{CDCl}_3$ ): -173.96 (1F, ddd,  $J = 45.9, 27.5, 16.1$  Hz).

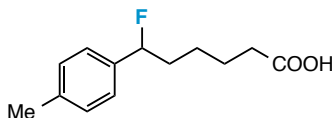

6-fluoro-6-(*p*-tolyl)hexanoic acid (**4**). 42% yield. White solid; m.p. 49-51 °C.  $\nu_{\max}/\text{cm}^{-1}$  3300-2500 (COOH) and 1695 (CO).  $^1\text{H NMR}$  ( $\text{CDCl}_3$ ): 8.77 (1H, br s), 7.23-7.17 (4H, m), 5.39 (1H, ddd,  $J = 47.7, 8.2, 4.9$  Hz), 2.43-2.33 (5H, m), 2.06-1.93 (1H, m), 1.90-1.76 (1H, m), 1.74-1.66 (2H, m), 1.59-1.50 (1H, m), 1.48-1.39 (1H, m);  $^{13}\text{C NMR}$  ( $\text{CDCl}_3$ ): 138.10, 138.07, 137.3, 137.1, 129.1, 125.6, 125.5, 94.3 (d,  $J = 169.5$  Hz), 36.8, 36.6, 24.69, 24.65, 24.4, 21.2.  $^{19}\text{F NMR}$  ( $\text{CDCl}_3$ ): -172.10 (1F, ddd,  $J = 45.9, 27.5, 16.1$  Hz).

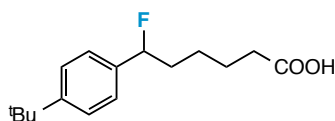

6-(4-(*tert*-butyl)phenyl)-6-fluorohexanoic acid (**5**). 64% yield. Clear oil.  $\nu_{\max}/\text{cm}^{-1}$  3300-2500 (COOH) and 1706 (CO).  $^1\text{H NMR}$  ( $\text{CDCl}_3$ ): 11.47 (1H, br s), 7.40 (2H, dm,  $J = 8.6$  Hz), 7.38 (2H, dm,  $J = 8.2$  Hz), 5.40 (1H, ddd,  $J = 47.7, 8.2, 4.7$  Hz), 2.36 (2H, t,  $J = 7.4$  Hz), 2.09-1.93 (1H, m), 1.91-1.74 (1H, m), 1.70 (2H, quint,  $J = 7.8$  Hz), 1.61-1.51 (1H, m), 1.50-1.38 (1H, m), 1.32 (9H, s);  $^{13}\text{C NMR}$  ( $\text{CDCl}_3$ ): 180.1, 151.30, 151.28, 137.3, 137.1, 125.38, 125.35, 125.31, 93.4 (d,  $J = 169.5$  Hz), 36.7, 36.5, 34.6, 33.9, 31.31, 31.29, 24.73, 24.68, 24.4;  $^{19}\text{F NMR}$  ( $\text{CDCl}_3$ ): -172.34 (1F, ddd,  $J = 45.9, 28.7, 16.1$  Hz).

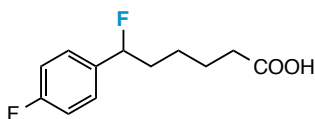

6-fluoro-6-(4-fluorophenyl)hexanoic acid (**6**). 70% yield. Clear oil.  $\nu_{\max}/\text{cm}^{-1}$  3300-2500 (COOH) and 1705 (CO).  $^1\text{H NMR}$  ( $\text{CDCl}_3$ ): 11.27 (1H, br s), 7.31-7.26 (2H, m), 7.06 (2H, t,  $J = 8.4$  Hz), 5.40 (1H, ddd,  $J = 47.9, 8.0, 4.9$  Hz), 2.37 (2H, t,  $J = 7.4$  Hz), 2.05-1.91 (1H, m), 1.89-1.75 (1H, m), 1.69 (2H, quint,  $J = 7.6$  Hz), 1.58-1.48 (1H, m), 1.48-1.36 (1H, m);  $^{13}\text{C NMR}$  ( $\text{CDCl}_3$ ): 179.7, 162.6 (dd,  $J = 246.2, 2.2$  Hz), 127.4 (d,  $J = 6.6$  Hz), 127.3 (d,  $J = 6.6$  Hz), 124.0 (d,  $J = 3.7$  Hz), 115.4 (d,  $J = 21.4$  Hz), 93.7 (d,  $J = 171.8$  Hz), 36.8 (d,  $J = 24.3$  Hz), 33.8, 24.6 (d,  $J = 4.4$  Hz), 24.29;  $^{19}\text{F NMR}$  ( $\text{CDCl}_3$ ): -113.2 (1F, m), -172.0 (1F, ddd,  $J = 48.2, 28.7, 17.2$  Hz).

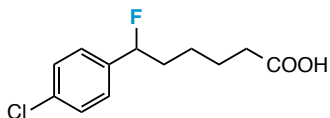

6-(4-chlorophenyl)-6-fluorohexanoic acid (**7**). 54% yield. Clear oil.  $\nu_{\max}/\text{cm}^{-1}$  3300-2500 (COOH) and 1684 (CO).  $^1\text{H NMR}$  ( $\text{CDCl}_3$ ): 8.65 (1H, br s), 7.34 (2H, d,  $J = 7.8$  Hz), 7.24 (2H, d,  $J = 8.6$  Hz), 5.40 (1H, ddd,  $J = 47.3, 8.0, 4.7$  Hz), 2.37 (1H, t,  $J = 7.0$  Hz), 2.03-1.90 (1H, m), 1.89-1.75 (1H, m), 1.69 (2H, quint,  $J = 7.4$  Hz), 1.58-1.48 (1H, m), 1.47-1.37 (1H, m);  $^{13}\text{C NMR}$  ( $\text{CDCl}_3$ ): 179.5, 138.8, 138.6, 134.02, 134.00, 128.6, 126.9, 126.8, 93.3 ( $J = 171.2$  Hz), 36.86, 36.85, 36.63, 36.61, 24.5, 24.4, 24.3;  $^{19}\text{F NMR}$  ( $\text{CDCl}_3$ ): -174.74 (1F, ddd,  $J = 45.9, 27.5, 17.2$  Hz).

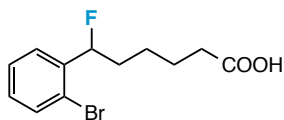

6-(2-bromophenyl)-6-fluorohexanoic acid (**8**). 63% yield. Clear oil.  $\nu_{\max}/\text{cm}^{-1}$  3300-2500 (COOH) and 1685 (CO).  $^1\text{H NMR}$  ( $\text{CDCl}_3$ ): 7.52 (1H, dt,  $J = 8.0, 1.1$  Hz), 7.48 (1H, dd,  $J = 7.8, 1.6$  Hz), 7.36 (1H, td,  $J = 7.5, 1.2$  Hz), 7.18 (1H, td,  $J = 7.8, 1.8$  Hz), 5.76 (1H, ddd,  $J = 47.3, 8.4, 3.5$  Hz), 2.40 (2H, t,  $J = 7.4$  Hz), 2.02-1.82 (2H, m), 1.80-1.67 (2H, m), 1.66-1.54 (2H, m);  $^{13}\text{C NMR}$  ( $\text{CDCl}_3$ ): 178.7, 140.0, 139.8, 132.6, 129.4, 127.7, 126.8, 126.7, 120.64, 120.58, 93.1 (d,  $J = 172.5$  Hz), 35.9, 35.6, 33.7, 24.61, 24.59, 24.3;  $^{19}\text{F NMR}$  ( $\text{CDCl}_3$ ): -181.16 (1F, ddd,  $J = 47.0, 32.1, 20.7$  Hz).

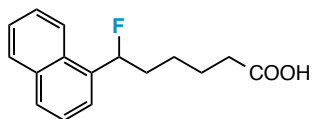

6-fluoro-6-(naphthalen-1-yl)hexanoic acid (**9**). 47% yield. Light brown oil.  $\nu_{\max}/\text{cm}^{-1}$  3300-2500 (COOH) and 1704 (CO).  $^1\text{H NMR}$  ( $\text{CDCl}_3$ ): 11.22 (1H, br s), 7.96-7.93 (1H, m), 7.88-7.86 (1H, m), 7.81 (1H, d,  $J = 8.2$  Hz), 7.57-7.45 (4H, m), 6.14 (1H, ddd,  $J = 47.1, 8.0, 4.3$  Hz), 2.36 (2H, t,  $J = 7.2$  Hz), 2.20-1.97 (2H, m), 1.78-1.51 (4H, m);  $^{13}\text{C NMR}$  ( $\text{CDCl}_3$ ): 179.8, 136.0, 135.8, 133.7, 129.85, 129.81, 128.9, 128.70, 128.68, 126.3, 125.7, 125.2, 123.1, 122.99, 122.94, 92.3 (d,  $J = 171.0$  Hz), 36.4, 36.2, 25.09, 25.06, 24.4;  $^{19}\text{F NMR}$  ( $\text{CDCl}_3$ ): -178.13 (1F, ddd,  $J = 48.2, 29.8, 19.5$  Hz).

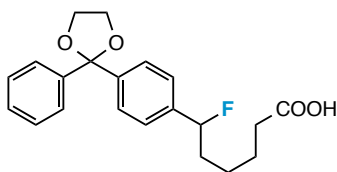

6-fluoro-6-(4-(2-phenyl-1,3-dioxolan-2-yl)phenyl)hexanoic acid (**10**). 51% yield. Clear oil.  $\nu_{\max}/\text{cm}^{-1}$  3300-2500 (COOH) and 1706 (OH).  $^1\text{H NMR}$  ( $\text{CD}_3\text{OD}$ ): 7.48-7.45 (4H, m), 7.33-7.24 (5H, m), 5.42 (1H, ddd,  $J = 47.9, 8.2, 4.9$  Hz), 4.02 (4H, s), 2.25 (2H, t,  $J = 7.3$  Hz), 2.00-1.73 (2H, m), 1.63 (2H, quint,  $J = 7.2$  Hz), 1.54-1.44 (1H, m), 1.43-1.33 (1H, m);  $^{13}\text{C NMR}$  ( $\text{CD}_3\text{OD}$ ): 178.5, 143.7, 143.6, 142.0, 141.8, 131.0, 129.1, 127.4, 127.3, 126.4, 126.3, 110.4, 95.2 (d,  $J = 169.5$  Hz), 65.9, 38.2, 37.9, 35.6, 26.1, 25.89, 25.85;  $^{19}\text{F NMR}$  ( $\text{CD}_3\text{OD}$ ): -175.90 (1F, ddd,  $J = 45.9, 28.7, 17.2$  Hz).

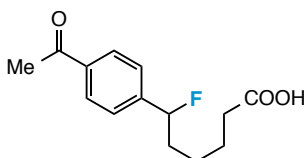

6-(4-acetylphenyl)-6-fluorohexanoic acid (**11**). 28% yield. Clear oil.  $\nu_{\max}/\text{cm}^{-1}$  3300-2500 (COOH) and 1668 (CO).  $^1\text{H NMR}$  ( $\text{CD}_3\text{OD}$ ): 8.00 (2H, d,  $J = 7.8$  Hz), 7.48 (2H, d,  $J = 8.4$  Hz), 5.54 (1H, ddd,  $J = 48.1, 7.8, 5.1$  Hz), 2.61 (3H, s), 2.16 (t,  $J = 7.5$  Hz), 2.02-1.75 (2H, m), 1.64 (2H, quint,  $J = 7.2$  Hz), 1.54-1.36 (2H, m);  $^{13}\text{C NMR}$  ( $\text{CD}_3\text{OD}$ ): 200.1, 182.6, 147.8, 147.6, 138.0, 129.6, 126.72, 126.65, 94.8 (d,  $J = 171.8$  Hz), 39.0, 38.3, 38.1, 27.4, 26.7, 26.10, 26.06;  $^{19}\text{F NMR}$  ( $\text{CD}_3\text{OD}$ ): -178.70 (1F, ddd,  $J = 47.0, 28.7, 18.4$  Hz).

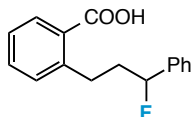

2-(3-fluoro-3-phenylpropyl)benzoic acid (**12**). 40% yield. Clear oil.  $\nu_{\max}/\text{cm}^{-1}$  3300-2500 (COOH) and 1687 (CO).  $^1\text{H NMR}$  ( $\text{CDCl}_3$ ): 11.67 (1H, br s), 8.09 (1H, d,  $J = 7.6$  Hz), 7.50 (1H, m), 7.36-7.28 (7H, m), 5.50 (1H, ddd,  $J = 47.9, 8.2, 3.9$  Hz), 3.28-3.21 (1H, m), 3.18-3.11 (1H, m), 2.38-2.22 (1H, m), 2.20-2.11 (1H, m);  $^{13}\text{C NMR}$  ( $\text{CDCl}_3$ ): 173.0, 144.4, 140.2, 140.0, 133.2, 132.0, 131.6, 128.54, 128.50, 128.4, 128.24, 128.22, 126.4, 125.6, 125.5, 94.1 (d,  $J = 171.0$  Hz), 38.9, 38.7, 30.6, 30.5;  $^{19}\text{F NMR}$  ( $\text{CDCl}_3$ ): -175.12 (1F, ddd,  $J = 47.0, 29.8, 16.1$  Hz).

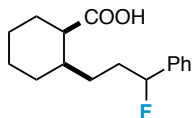

*cis*-2-(3-fluoro-3-phenylpropyl)cyclohexane-1-carboxylic acid (**13**). 58% yield. Clear oil.  $\nu_{\max}/\text{cm}^{-1}$  3300-2500 (COOH), 1702 (CO), and 1699 (CO).  $^1\text{H}$  NMR ( $\text{CDCl}_3$ ): 11.32 (1H, br s), 7.38-7.28 (5H, m), 5.49-5.29 (1H, m), 2.15-2.02 (1H, m), 2.01-1.83 (3H, m), 1.82-1.71 (2H, m), 1.70-1.59 (2H, m), 1.58-1.46 (1H, m), 1.44-1.35 (1H, m), 1.34-1.13 (2H, m), 1.00-0.87 (1H, m);  $^{13}\text{C}$  NMR ( $\text{CDCl}_3$ ): 182.4, 140.5, 140.3, 140.2, 128.39, 128.37, 128.25, 128.23, 128.12, 128.11, 125.7, 125.6, 125.5, 125.4, 95.0 (d,  $J = 170.3$  Hz), 94.4 (d,  $J = 171.8$  Hz), 49.7, 49.5, 38.3, 38.2, 34.3, 34.1, 34.0, 33.8, 30.5, 30.4, 30.18, 30.15, 30.13, 30.00, 29.97, 25.5, 25.30, 25.28;  $^{19}\text{F}$  NMR ( $\text{CDCl}_3$ ): -171.99 (1F, m), -175.23 (1F, ddd,  $J = 48.2, 31.0, 17.2$  Hz).

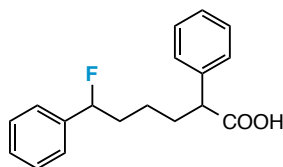

6-fluoro-2,6-diphenylhexanoic acid (**14**). 56% yield. Clear oil.  $\nu_{\max}/\text{cm}^{-1}$  3300-2500 (COOH) and 1704 (CO).  $^1\text{H}$  NMR ( $\text{CDCl}_3$ ): 7.37-7.25 (10H, m), 5.38 (1H, ddd,  $J = 47.7, 8.2, 4.5$  Hz), 3.59 (1H, br s), 2.19-2.07 (1H, m), 2.06-1.91 (1H, m), 1.91-1.72 (2H, m), 1.57-1.28 (3H, m);  $^{13}\text{C}$  NMR ( $\text{CDCl}_3$ ): 140.3, 140.1, 128.7, 128.4, 128.24, 128.23, 128.0, 127.5, 125.5, 125.4, 95.13, 95.08, 93.44, 93.38, 37.0, 36.8, 32.8, 23.3;  $^{19}\text{F}$  NMR ( $\text{CDCl}_3$ ): -174.16 (1F, ddd,  $J = 47.0, 29.8, 17.2$  Hz), -174.39 (1F, ddd,  $J = 47.0, 29.8, 16.1$  Hz).

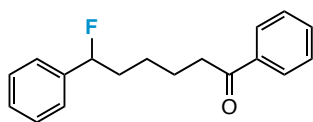

6-fluoro-1,6-diphenylhexanone (**15**). 30% yield. White solid; 30-32 °C.  $\nu_{\max}/\text{cm}^{-1}$  2938 (CH), 2863 (CH), and 1684 (CO).  $^1\text{H}$  NMR ( $\text{CDCl}_3$ ): 7.96-7.93 (2H, m), 7.59-7.53 (1H, m), 7.49-7.43 (2H, m), 7.39-7.30 (5H, m), 5.45 (1H, ddd,  $J = 47.5, 7.8, 5.0$  Hz), 2.99 (1H, t, 7.3 Hz), 2.17-1.87 (2H, m), 1.86-1.74 (2H, m), 1.65-1.55 (1H, m), 1.53-1.40 (1H, m);  $^{13}\text{C}$  NMR ( $\text{CDCl}_3$ ): 200.1, 133.0, 128.64, 128.60, 128.50, 128.45, 128.2, 128.1, 128.0, 125.6, 125.5, 94.4 (d,  $J = 169.5$  Hz), 38.4, 37.1 (d,  $J = 23.6$  Hz), 24.9, 23.9;  $^{19}\text{F}$  NMR ( $\text{CDCl}_3$ ): -174.1 (1F, ddd,  $J = 47.0, 28.7, 16.1$  Hz).



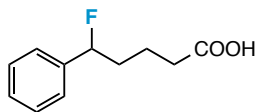

5-fluoro-5-phenylpentanoic acid (**17**). 58% yield. Clear oil.  $\nu_{\max}/\text{cm}^{-1}$  3300-2500 (COOH) and 1705 (CO).  $^1\text{H}$  NMR ( $\text{CDCl}_3$ ): 11.19 (1H, br s), 7.39-7.35 (2H, m), 7.33-7.31 (3H, m), 5.45 (1H, ddd,  $J = 48.1, 7.8, 4.1$  Hz), 2.44-2.41 (2H, m), 2.09-1.98 (1H, m), 1.96-1.81 (2H, m), 1.79-1.69 (1H, m);  $^{13}\text{C}$  NMR ( $\text{CDCl}_3$ ): 179.5, 140.1, 139.9, 128.5, 128.3, 125.5, 125.4, 94.1 (d,  $J = 171.8$  Hz), 36.5, 36.2, 20.4, 20.3;  $^{19}\text{F}$  NMR ( $\text{CDCl}_3$ ): -174.90 (1F, ddd,  $J = 45.9, 28.7, 18.4$  Hz).

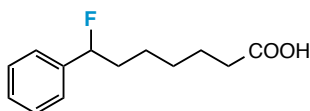

7-fluoro-7-phenylheptanoic acid (**18**). 57% yield. Clear oil.  $\nu_{\max}/\text{cm}^{-1}$  3300-2500 (COOH) and 1706 (CO).  $^1\text{H}$  NMR ( $\text{CDCl}_3$ ): 10.49 (1H, br s), 7.41-7.36 (2H, m), 7.35-7.31 (3H, m), 5.43 (1H, ddd,  $J = 47.7, 8.0, 4.7$  Hz), 2.35 (2H, t,  $J = 7.4$  Hz), 2.06-1.92 (1H, m), 1.91-1.75 (1H, m), 1.65 (2H, quint,  $J = 7.4$  Hz), 1.57-1.47 (1H, m), 1.45-1.38 (3H, m);  $^{13}\text{C}$  NMR ( $\text{CDCl}_3$ ): 180.2, 140.5, 140.3, 128.4, 128.17, 128.16, 125.5, 125.4, 94.5 (d,  $J = 171.0$  Hz), 37.1, 36.8, 34.0, 28.7, 24.72, 24.68, 24.4;  $^{19}\text{F}$  NMR ( $\text{CDCl}_3$ ): -174.05 (1F, ddd,  $J = 47.0, 28.7, 17.2$  Hz).

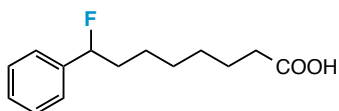

8-fluoro-8-phenyloctanoic acid (**19**). 46% yield. Clear oil.  $\nu_{\max}/\text{cm}^{-1}$  3300-2500 (COOH) and 1705 (CO).  $^1\text{H}$  NMR ( $\text{CDCl}_3$ ): 9.97 (1H, br s), 7.40-7.35 (2H, m), 7.34-7.29 (3H, m), 5.41 (1H, ddd,  $J = 47.7, 8.0, 4.9$  Hz), 2.34 (2H, t,  $J = 7.4$  Hz), 2.03-1.90 (1H, m), 1.88-1.73 (1H, m), 1.62 (2H, quint,  $J = 7.2$  Hz), 1.54-1.44 (1H, m), 1.43-1.31 (5H, m);  $^{13}\text{C}$  NMR ( $\text{CDCl}_3$ ): 180.1, 140.6, 140.4, 128.4, 128.3, 128.16, 128.14, 125.53, 125.46, 94.6 (d,  $J = 170.3$  Hz), 37.2, 37.0, 34.0, 28.9, 28.8, 24.9, 24.8, 24.5;  $^{19}\text{F}$  NMR ( $\text{CDCl}_3$ ): -173.83 (1F, ddd,  $J = 47.0, 27.5, 17.2$  Hz).

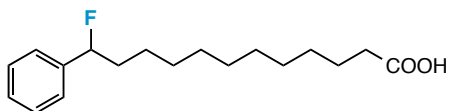

12-fluoro-12-phenyldodecanoic acid (**20**). 30% yield. White solid; m.p. 58-61 °C.  $\nu_{\max}/\text{cm}^{-1}$  3300-2500 (COOH) and 1704 (CO).  $^1\text{H}$  NMR ( $\text{CDCl}_3$ ): 8.01 (1H, br s), 7.39-7.35 (2H, m), 7.33-7.29 (3H, m), 5.41 (1H, ddd,  $J = 47.9, 8.2, 5.1$  Hz), 2.34 (2H, t,  $J = 7.4$  Hz), 2.03-1.90 (1H, m), 1.88-1.72 (1H, m), 1.62 (2H, quint,  $J = 7.2$  Hz), 1.52-1.41 (1H, m), 1.40-1.23 (13H, m);  $^{13}\text{C}$  NMR ( $\text{CDCl}_3$ ): 140.7, 140.5, 128.4, 128.13, 128.11, 125.6, 125.5, 94.7 (d,  $J = 171.0$  Hz), 37.3, 37.1, 29.43, 29.41, 29.35, 29.33, 29.2, 29.0, 25.10, 25.05, 24.7;  $^{19}\text{F}$  NMR ( $\text{CDCl}_3$ ): -173.57 (1F, ddd,  $J = 47.0, 28.7, 17.2$  Hz).

6-fluoro-6-phenyl-hexanoic acid

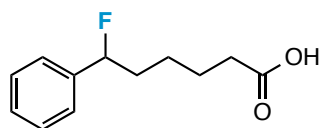

-174.15  
-174.21  
-174.25  
-174.31  
-174.35  
-174.42  
-174.48

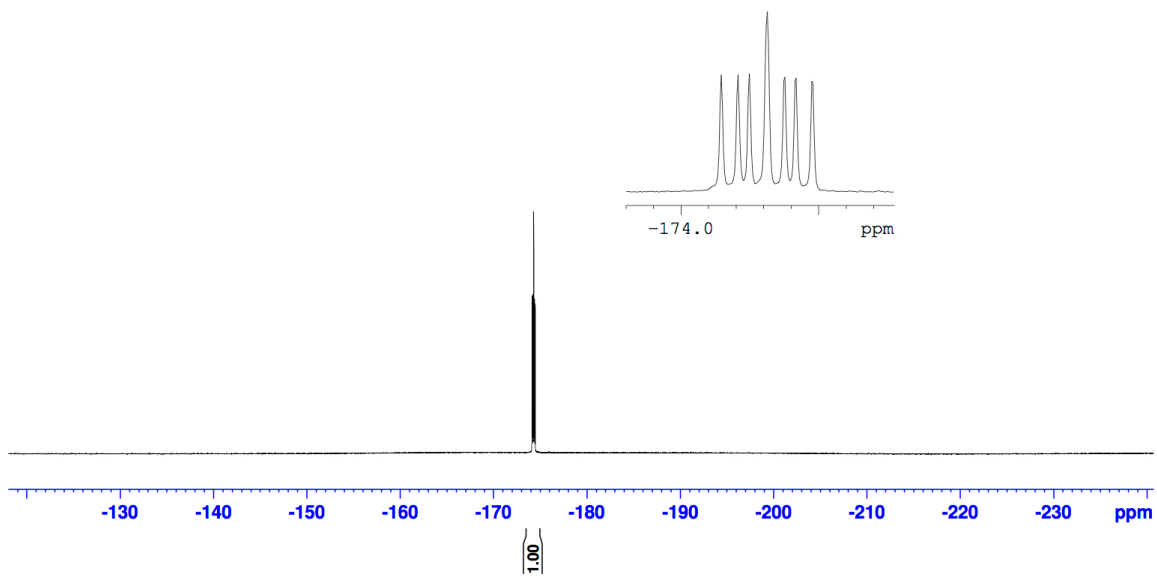

# 6-fluoro-6-phenyl-hexanoic acid

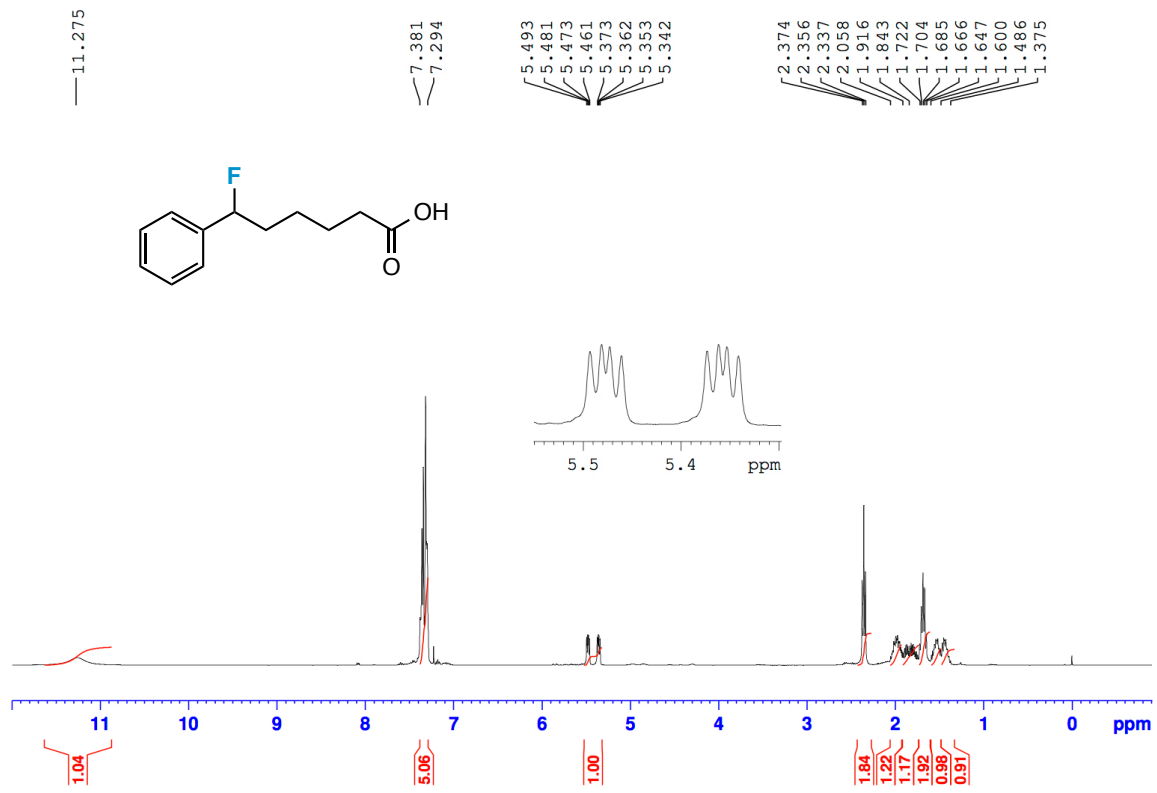

# 6-fluoro-6-phenyl-hexanoic acid

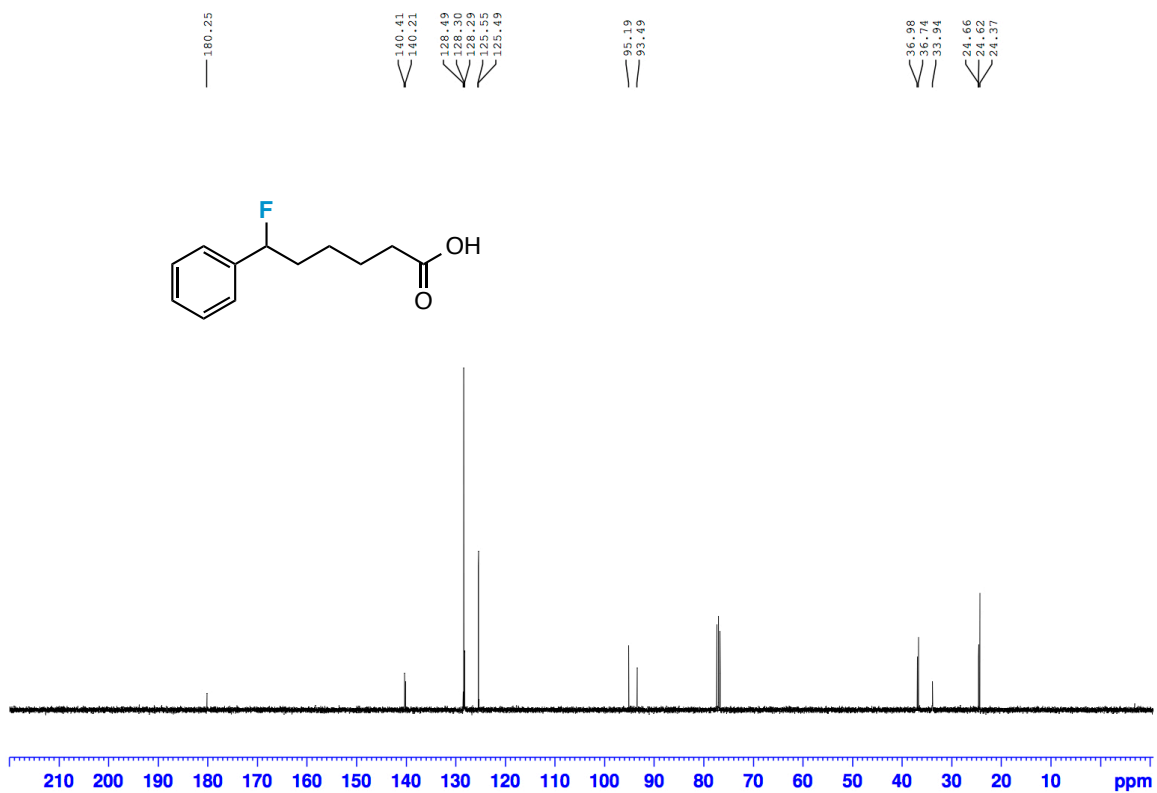

methyl 6-fluoro-6-phenylhexanoate

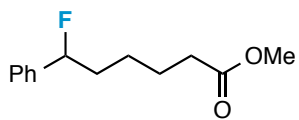

-174.08  
-174.14  
-174.18  
-174.24  
-174.30  
-174.35  
-174.41

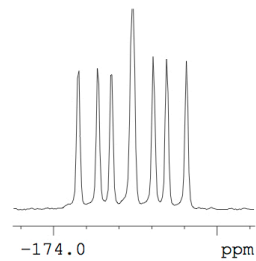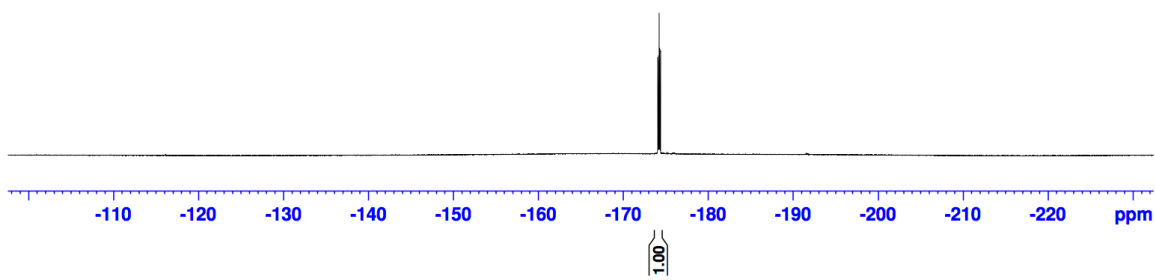

methyl 6-fluoro-6-phenylhexanoate

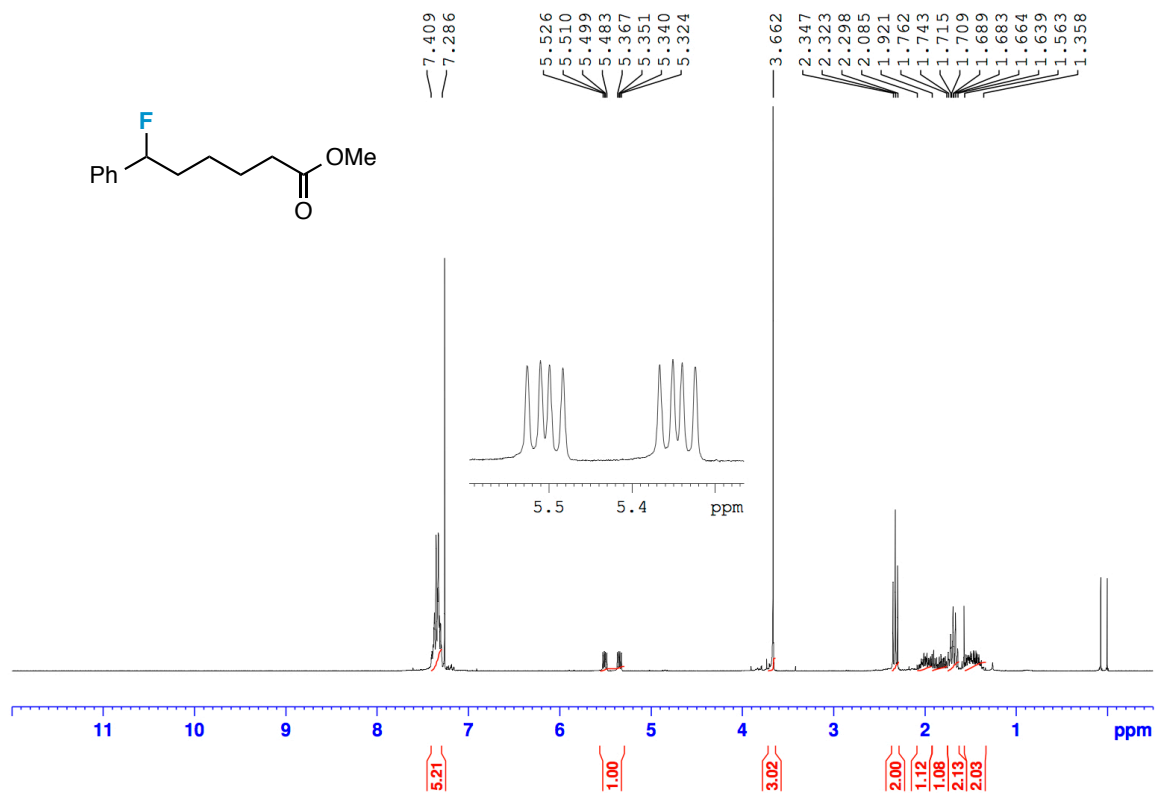

methyl 6-fluoro-6-phenylhexanoate

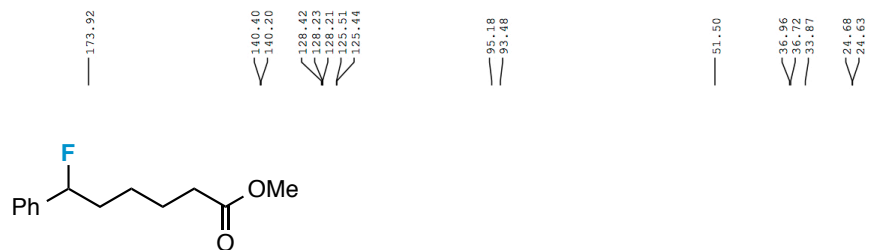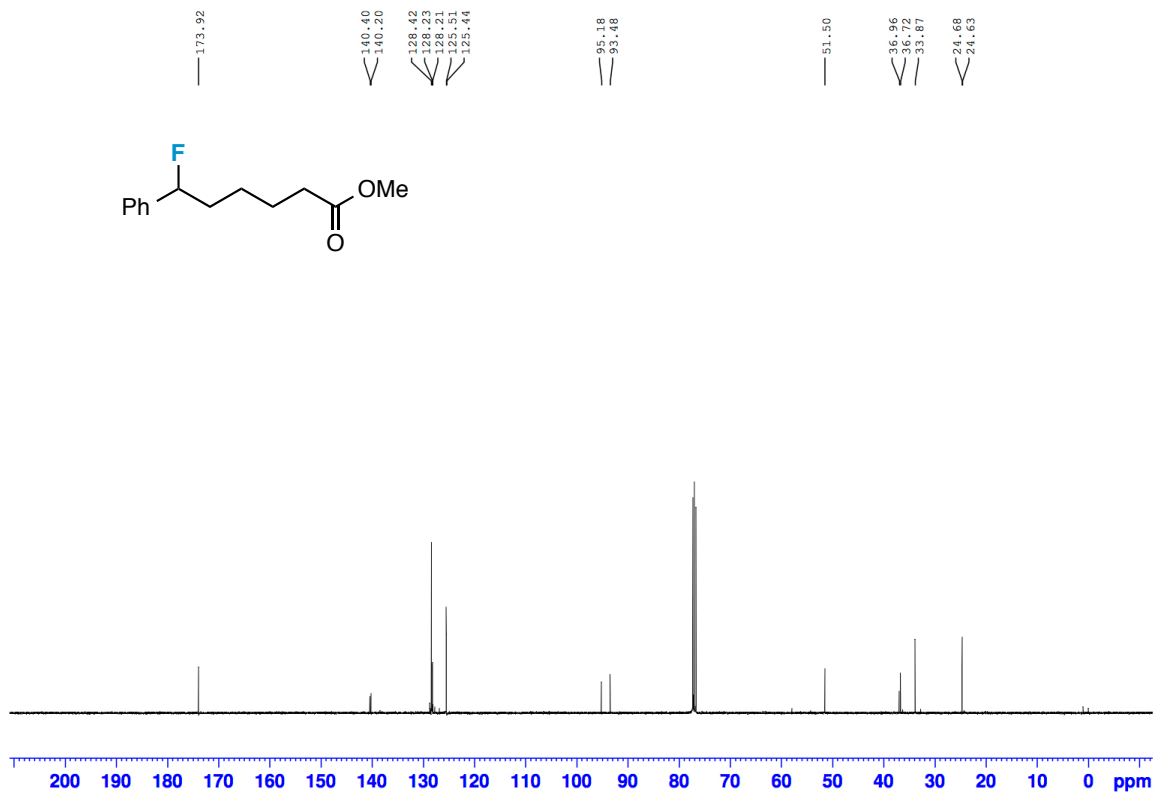

6-fluoro-6-phenylhexan-1-ol

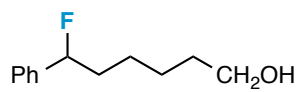

-173.79  
-173.85  
-173.89  
-173.96  
-174.02  
-174.06  
-174.12

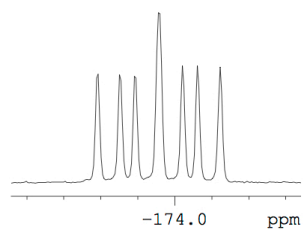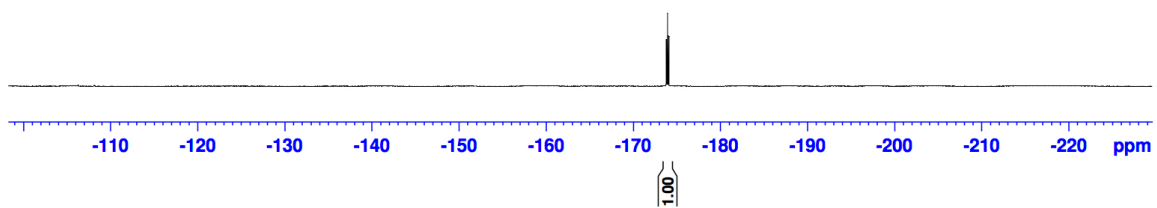



# 6-fluoro-6-phenylhexan-1-ol

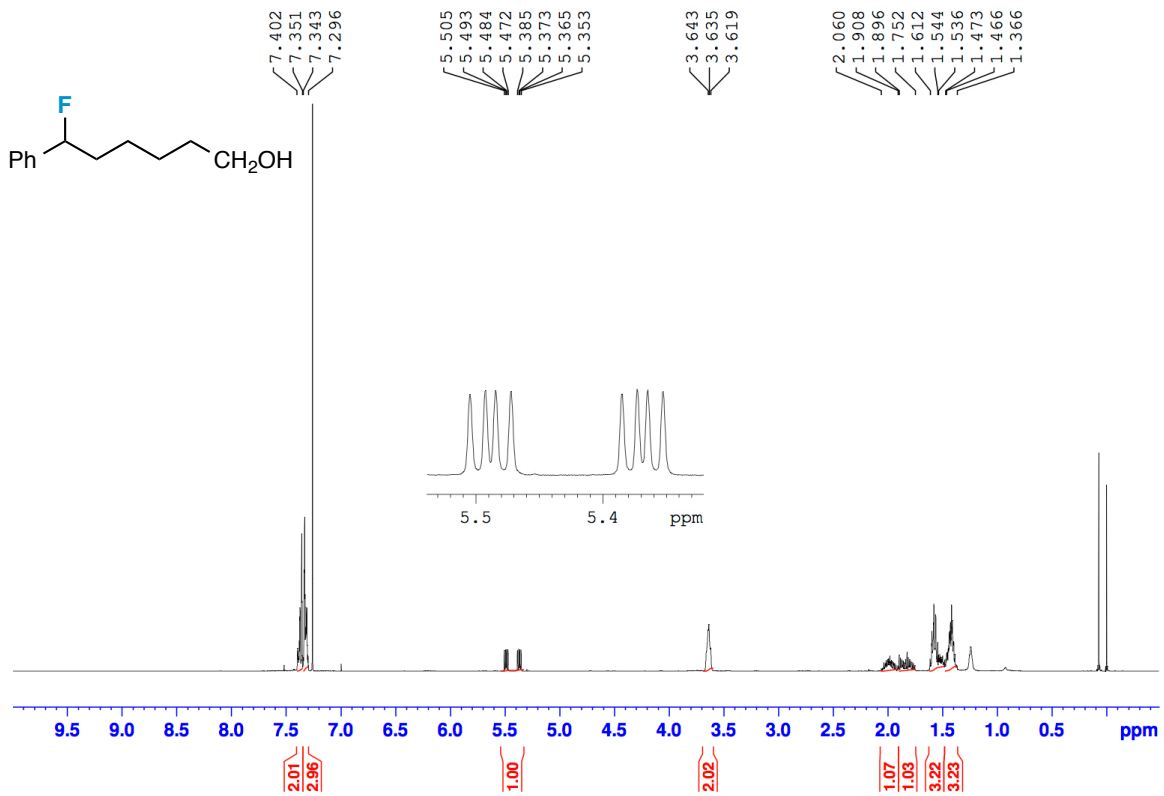

# 6-fluoro-6-phenylhexan-1-ol

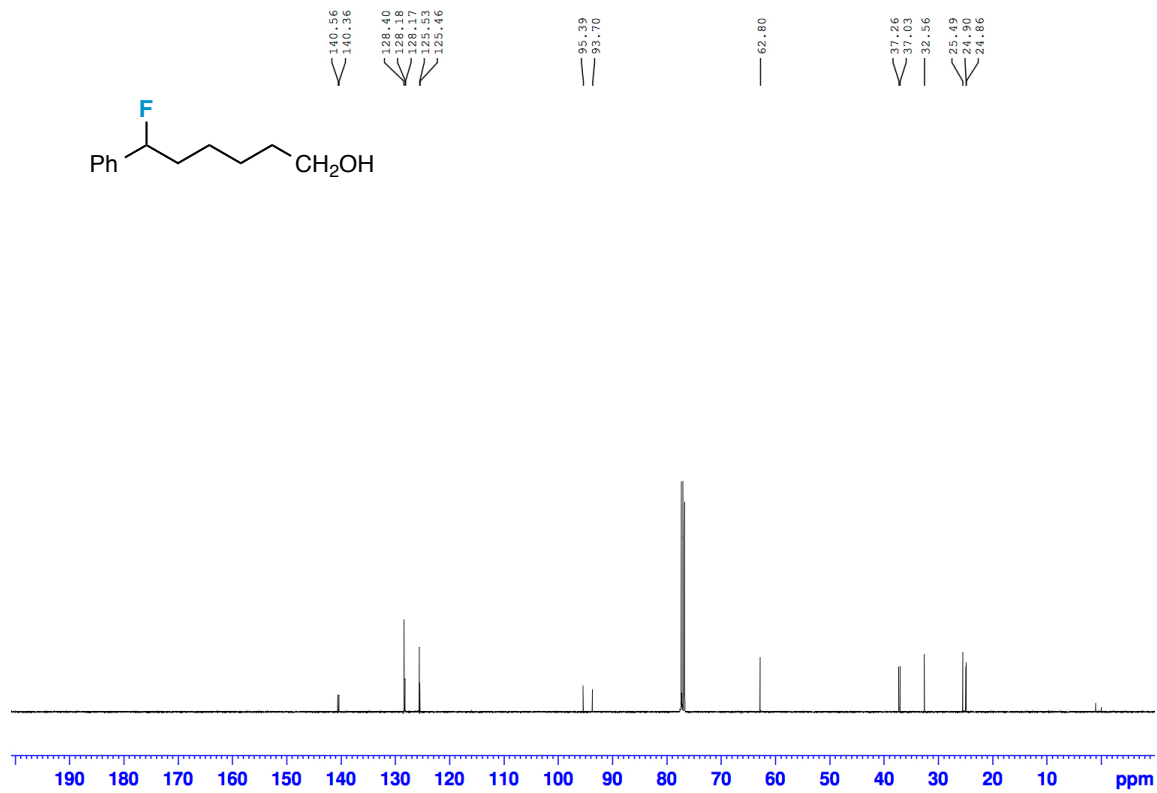

6-fluoro-6-(*p*-tolyl)hexanoic acid

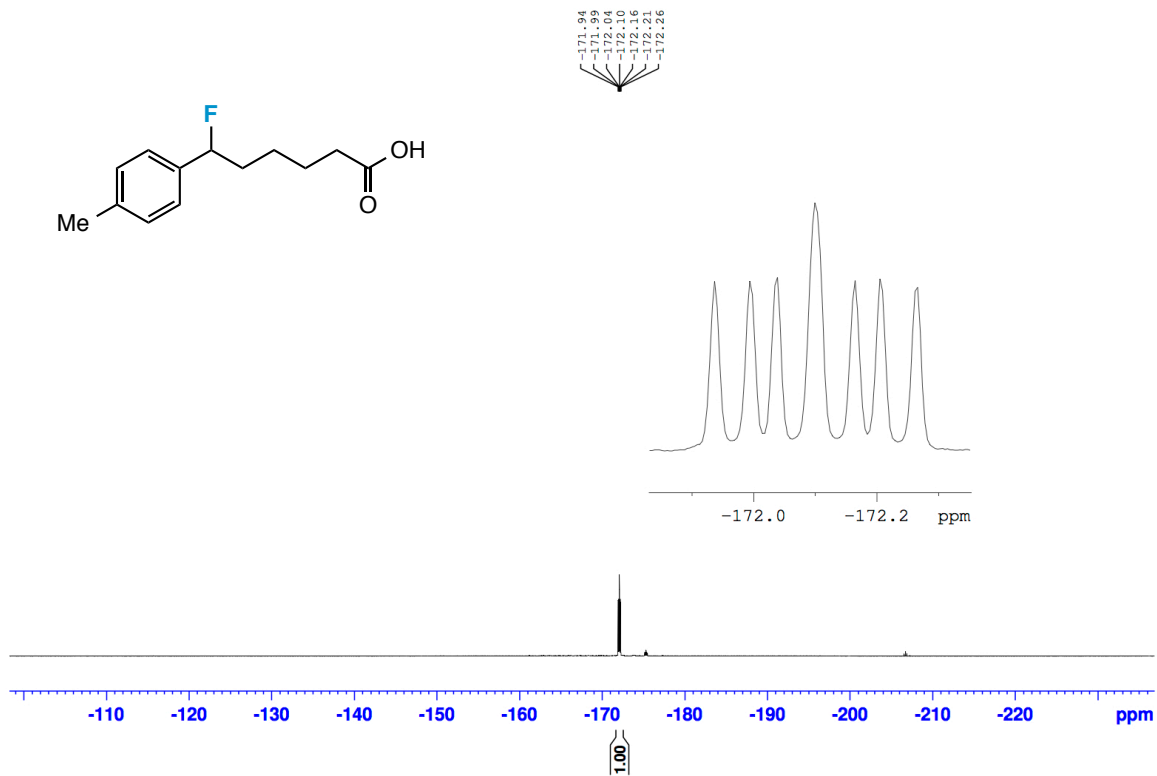

# 6-fluoro-6-(*p*-tolyl)hexanoic acid

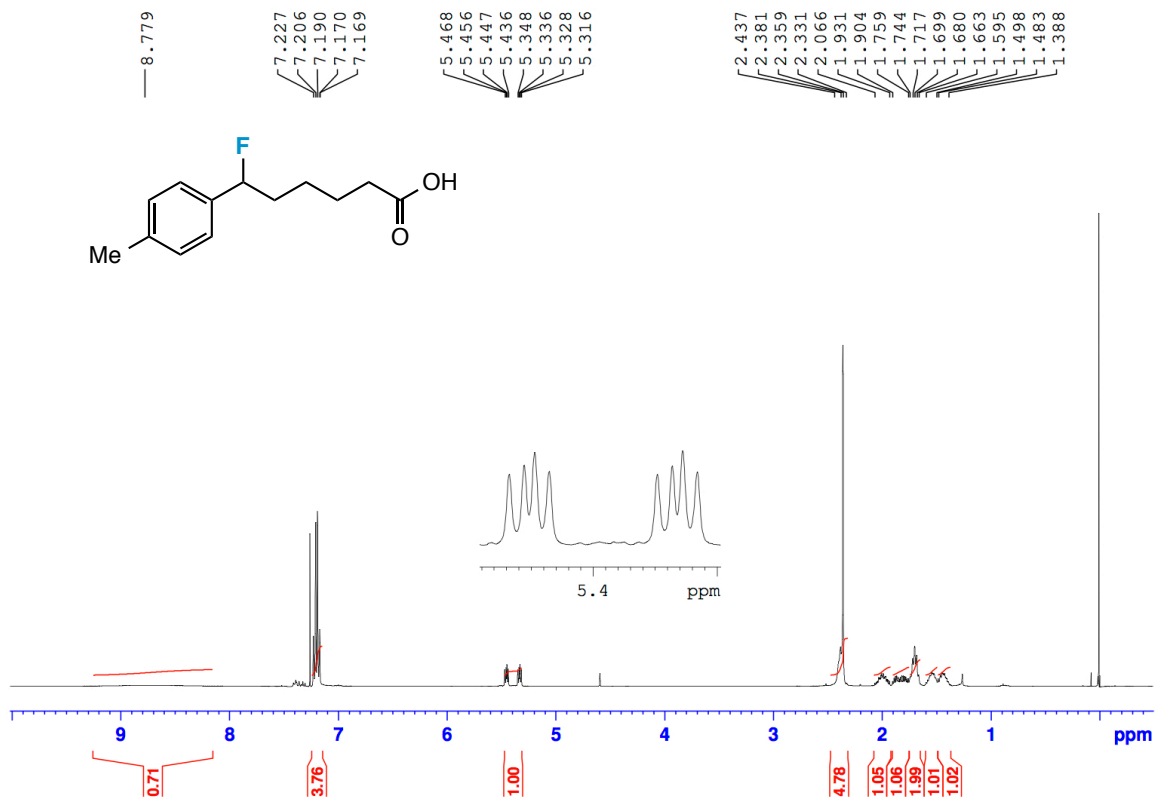

<sup>1</sup>H NMR (CDCl<sub>3</sub>):

6-fluoro-6-(*p*-tolyl)hexanoic acid

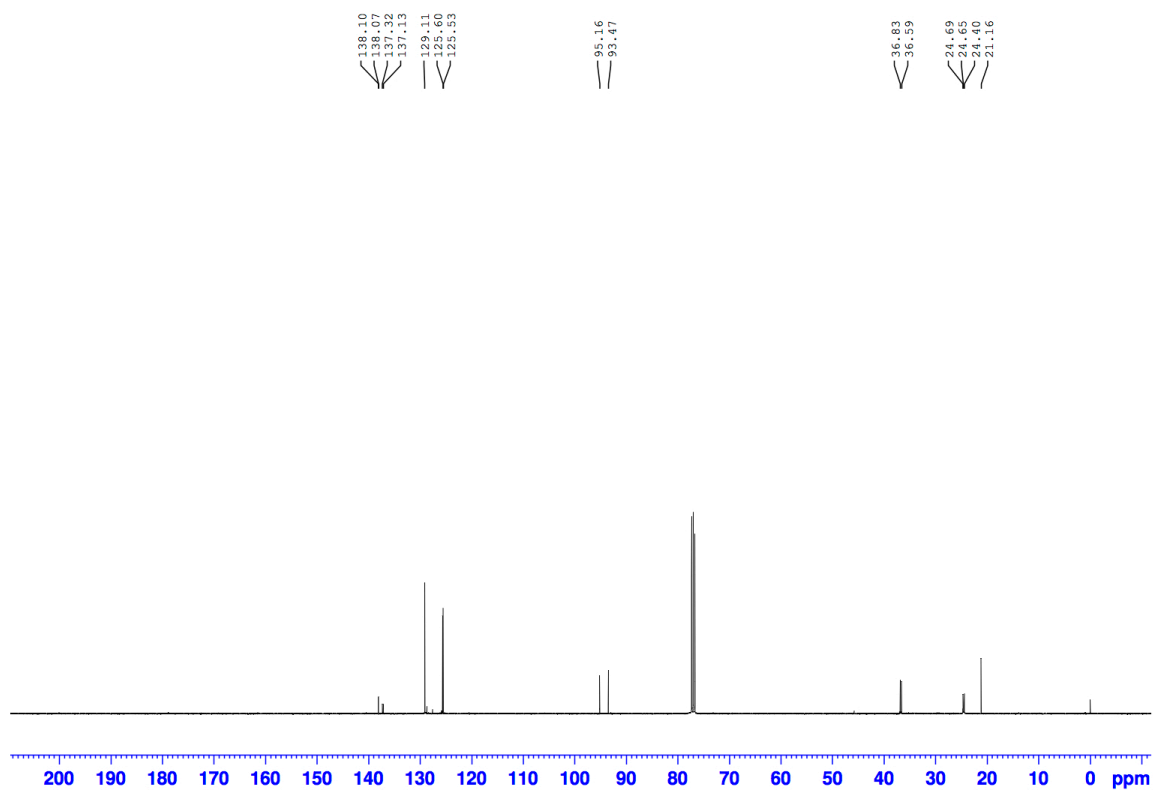

6-(4-(*tert*-butyl)phenyl)-6-fluorohexanoic acid

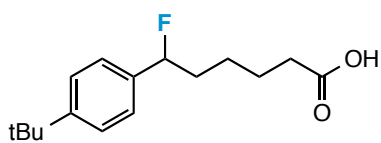

-172.18  
-172.23  
-172.28  
-172.33  
-172.40  
-172.45  
-172.51

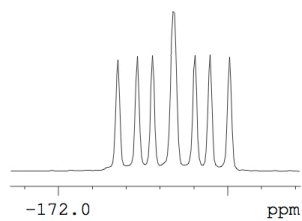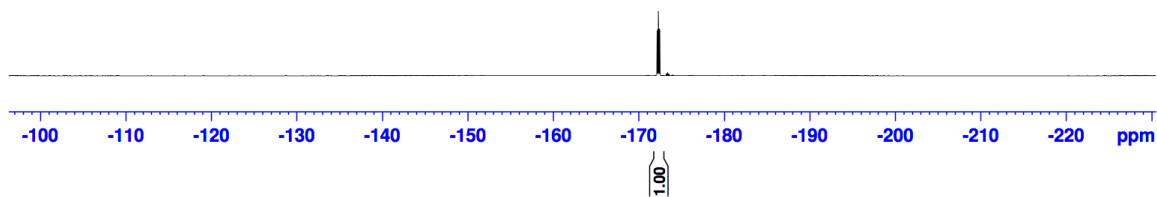

# 6-(4-(*tert*-butyl)phenyl)-6-fluorohexanoic acid

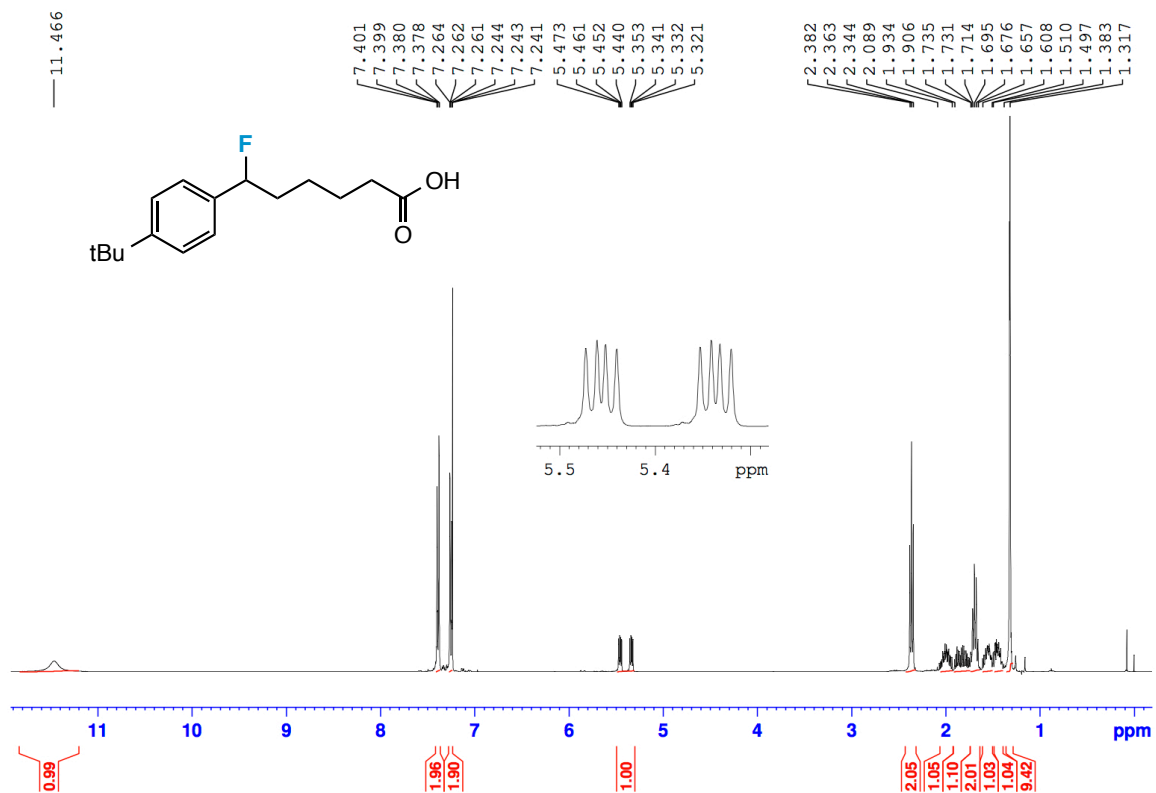

6-(4-(*tert*-butyl)phenyl)-6-fluorohexanoic acid

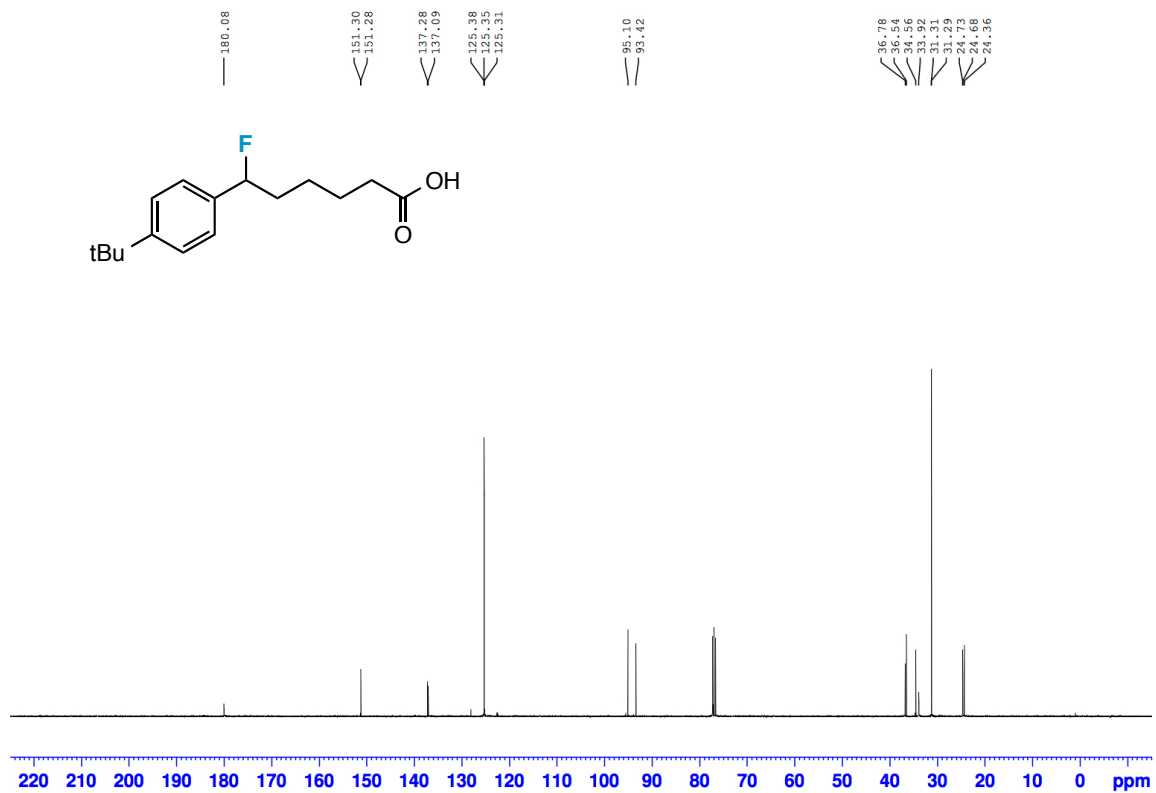



# 6-fluoro-6-(4-fluoro)phenyl-hexanoic acid

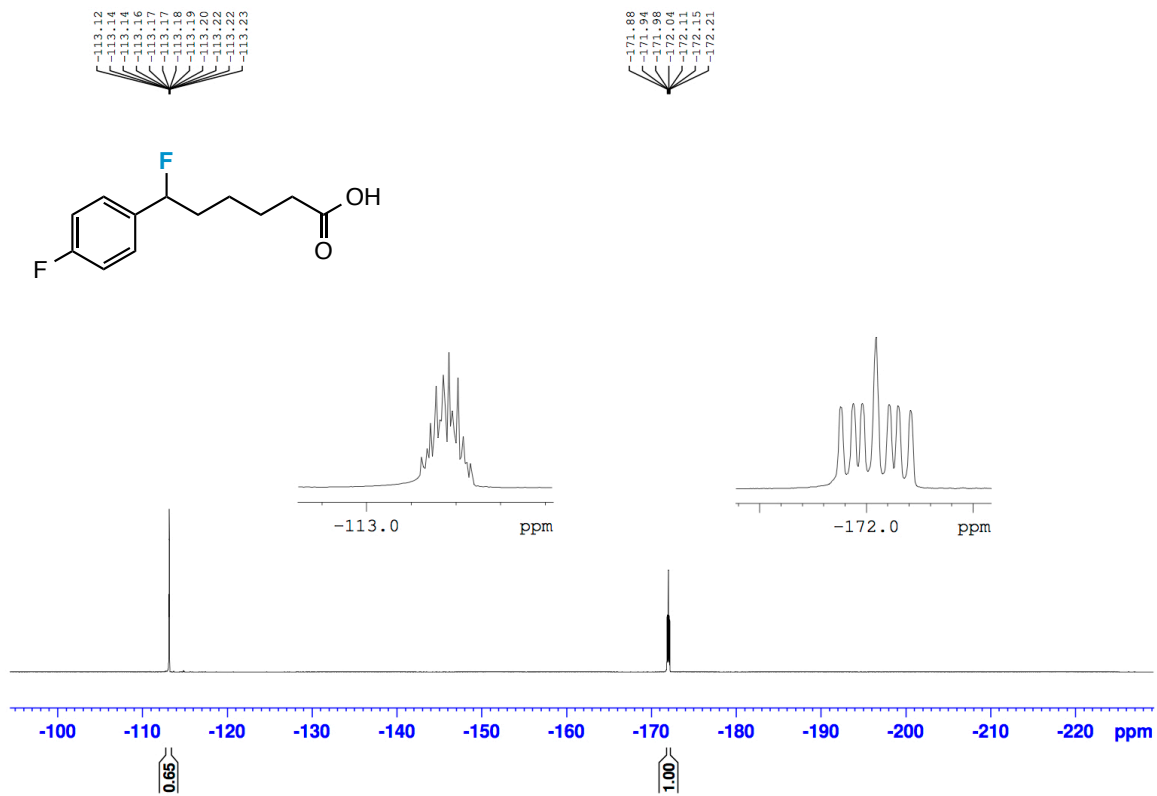

# 6-fluoro-6-(4-fluoro)phenyl-hexanoic acid

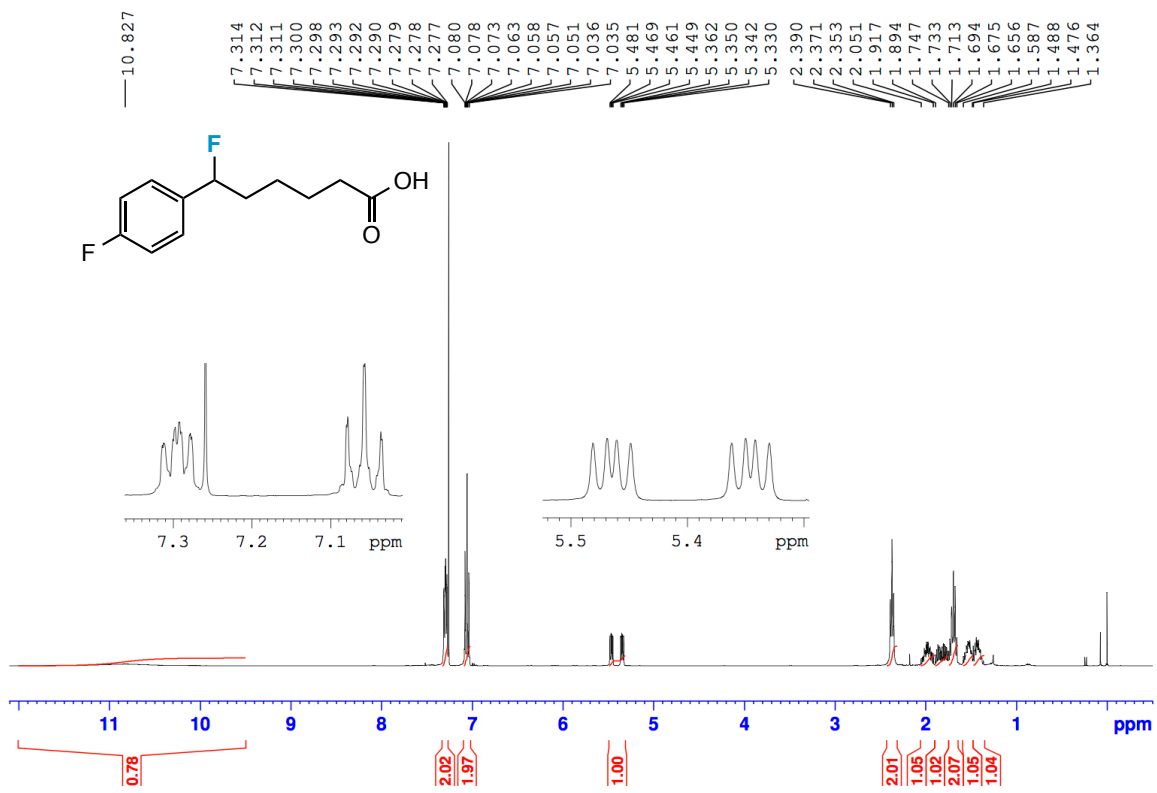

# 6-fluoro-6-(4-fluoro)phenyl-hexanoic acid

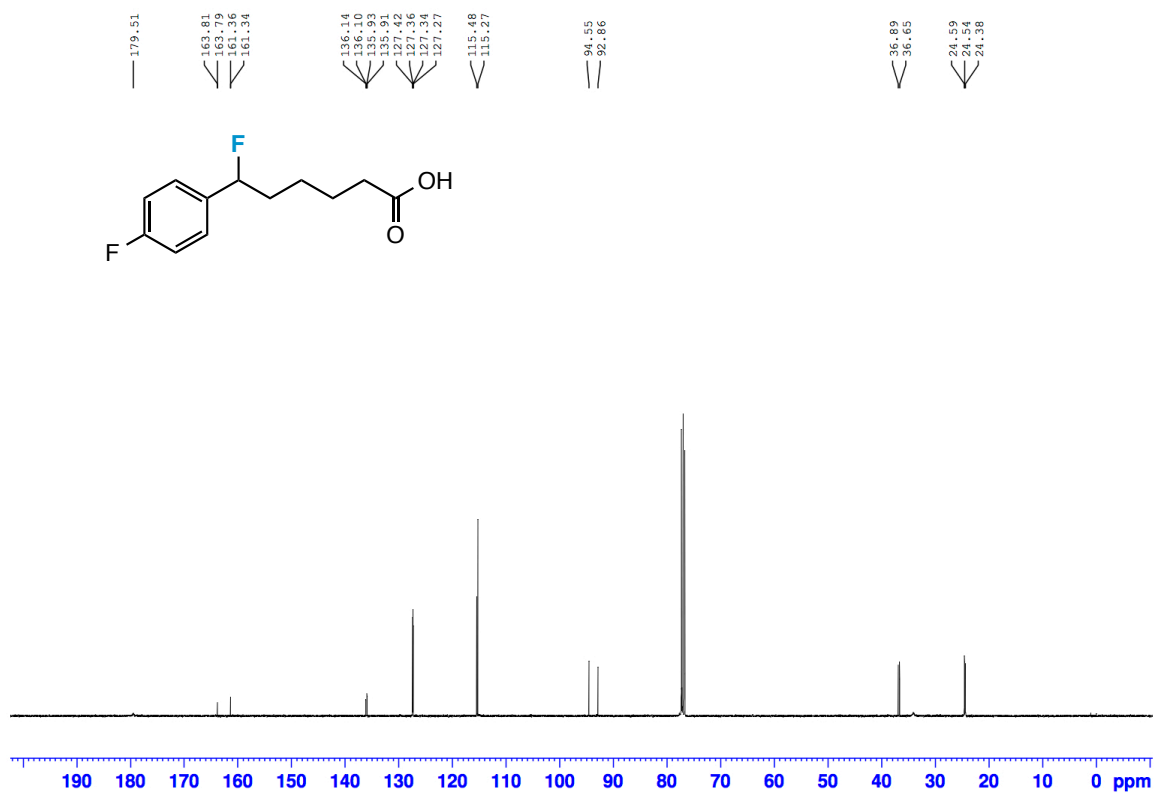

6-(4-chlorophenyl)-6-fluorohexanoic acid

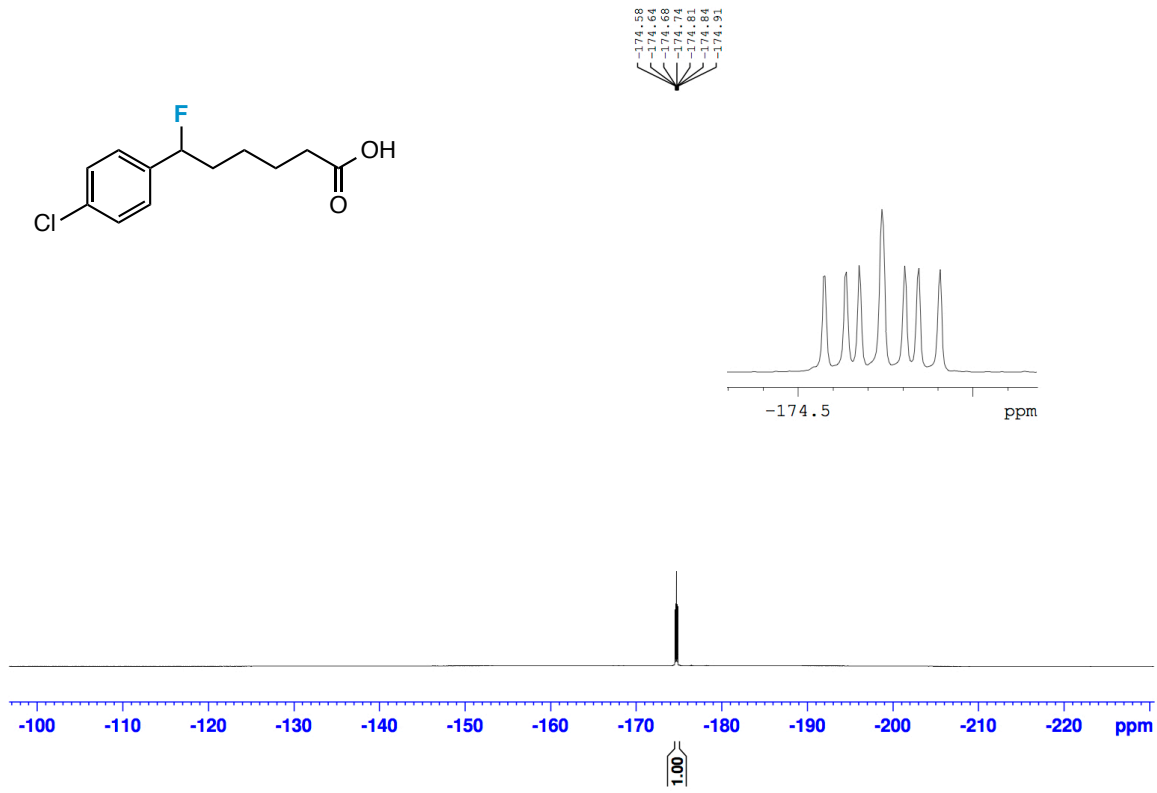

# 6-(4-chlorophenyl)-6-fluorohexanoic acid

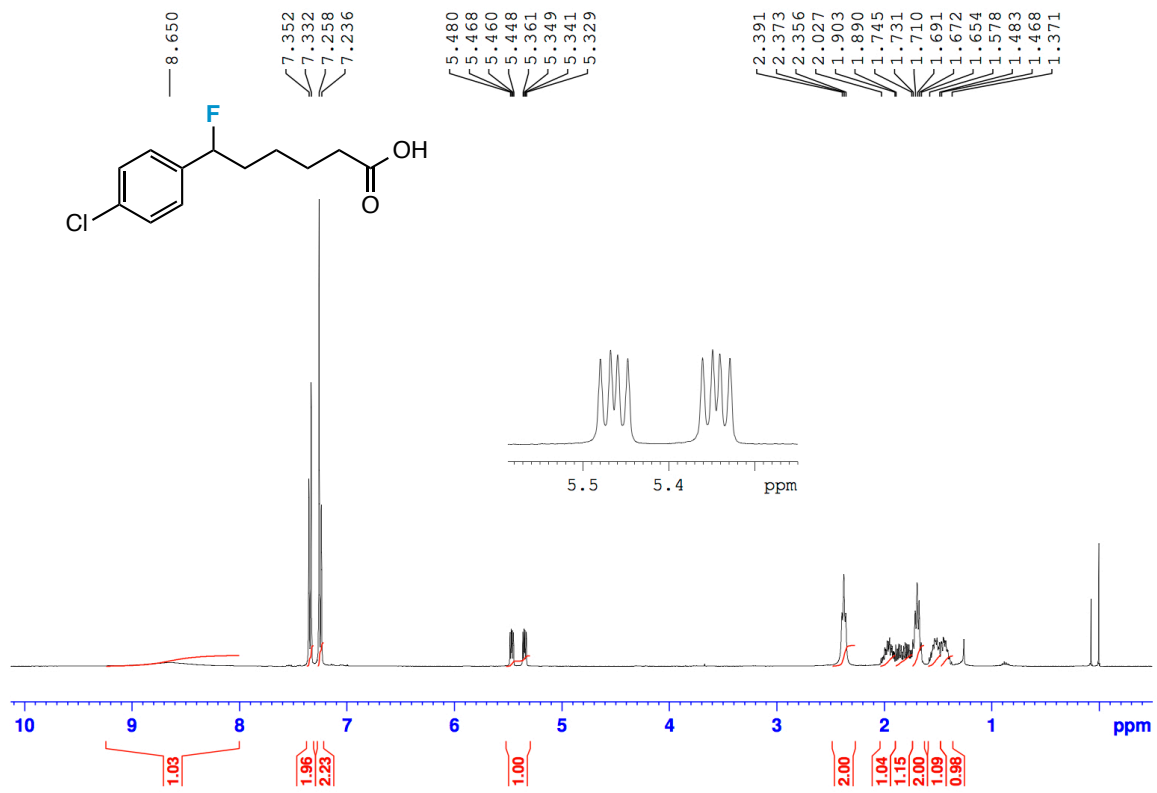

# 6-(4-chlorophenyl)-6-fluorohexanoic acid

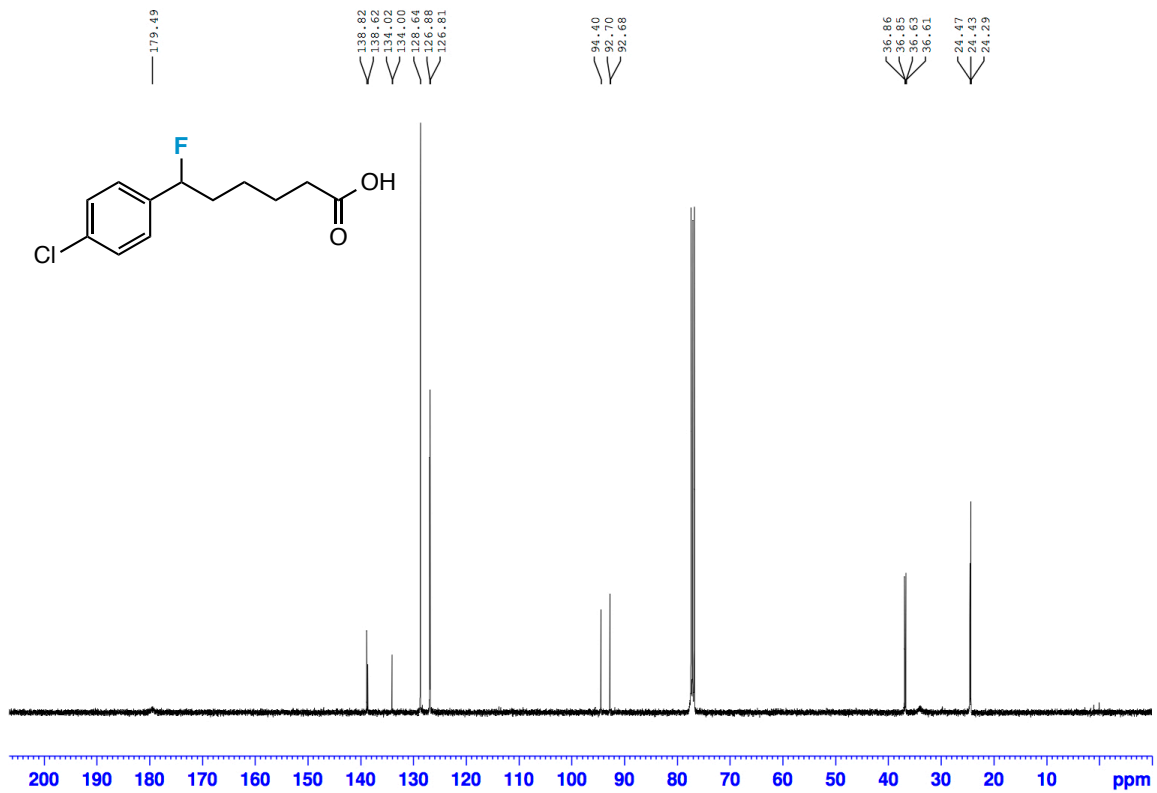

6-(2-bromophenyl)-6-fluorohexanoic acid

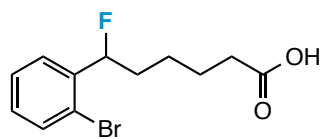

-180.99  
-181.06  
-181.10  
-181.15  
-181.23  
-181.27  
-181.34

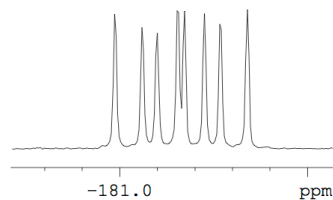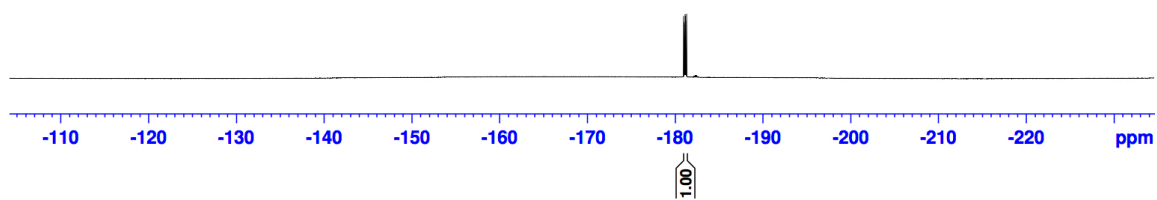

# 6-(2-bromophenyl)-6-fluorohexanoic acid

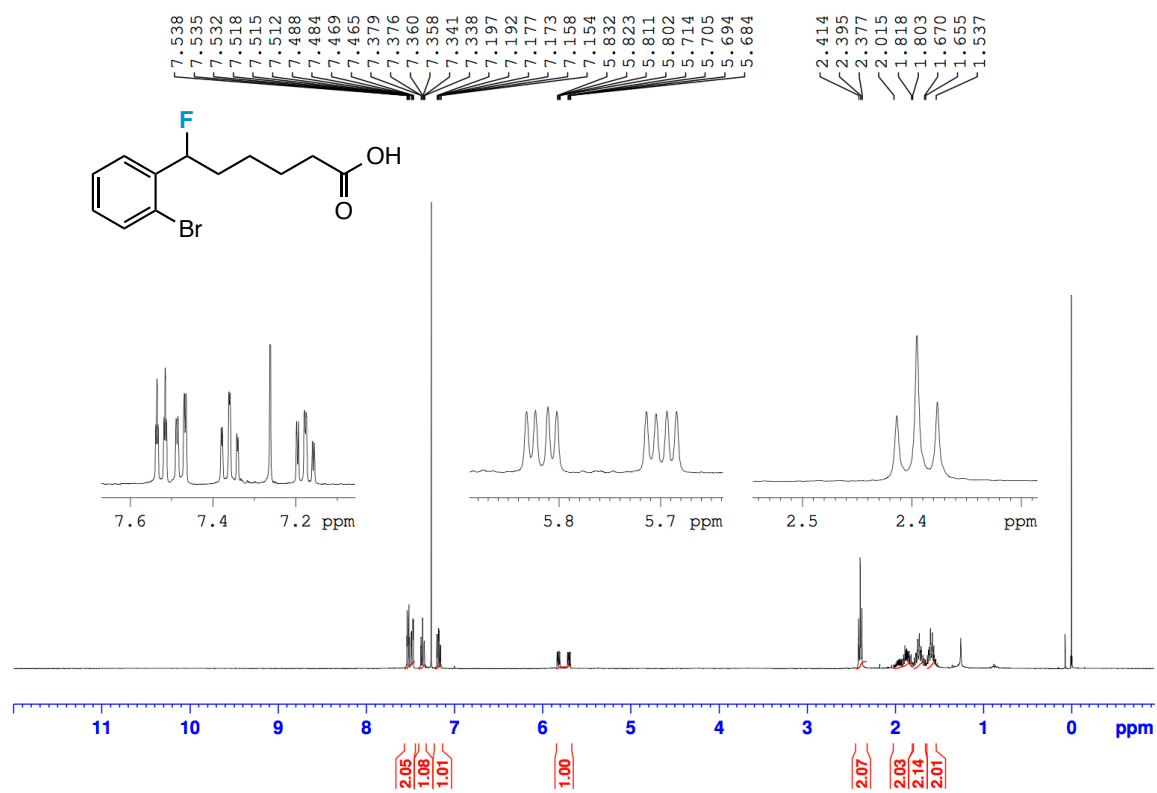



# 6-(2-bromophenyl)-6-fluorohexanoic acid

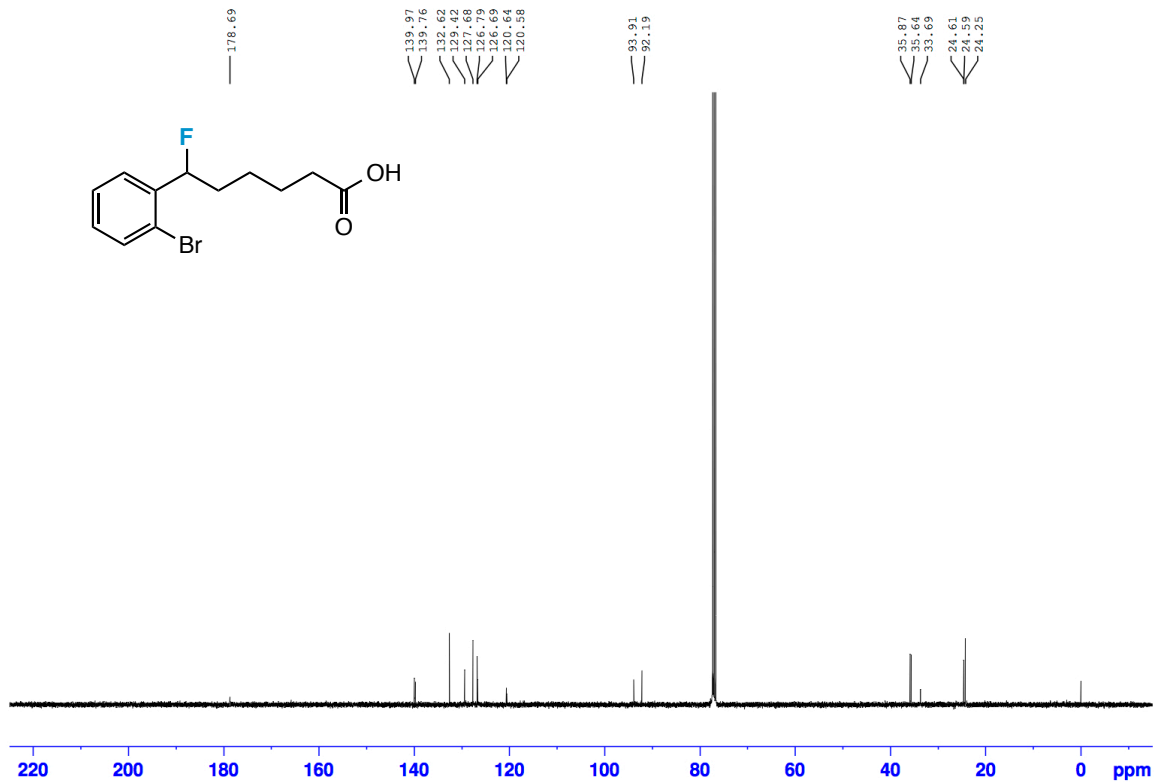

6-fluoro-6-(naphthalen-1-yl)hexanoic acid

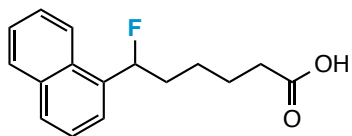

-177.96  
-178.03  
-178.07  
-178.10  
-178.20  
-178.24  
-178.31

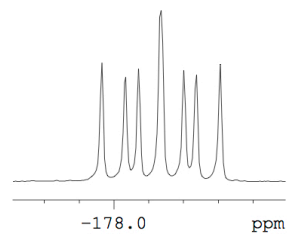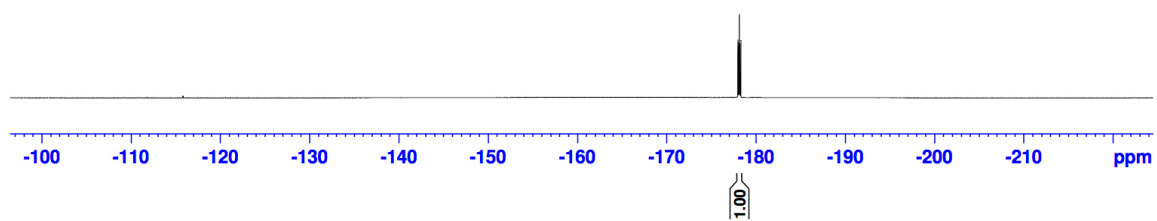

# 6-fluoro-6-(naphthalen-1-yl)hexanoic acid

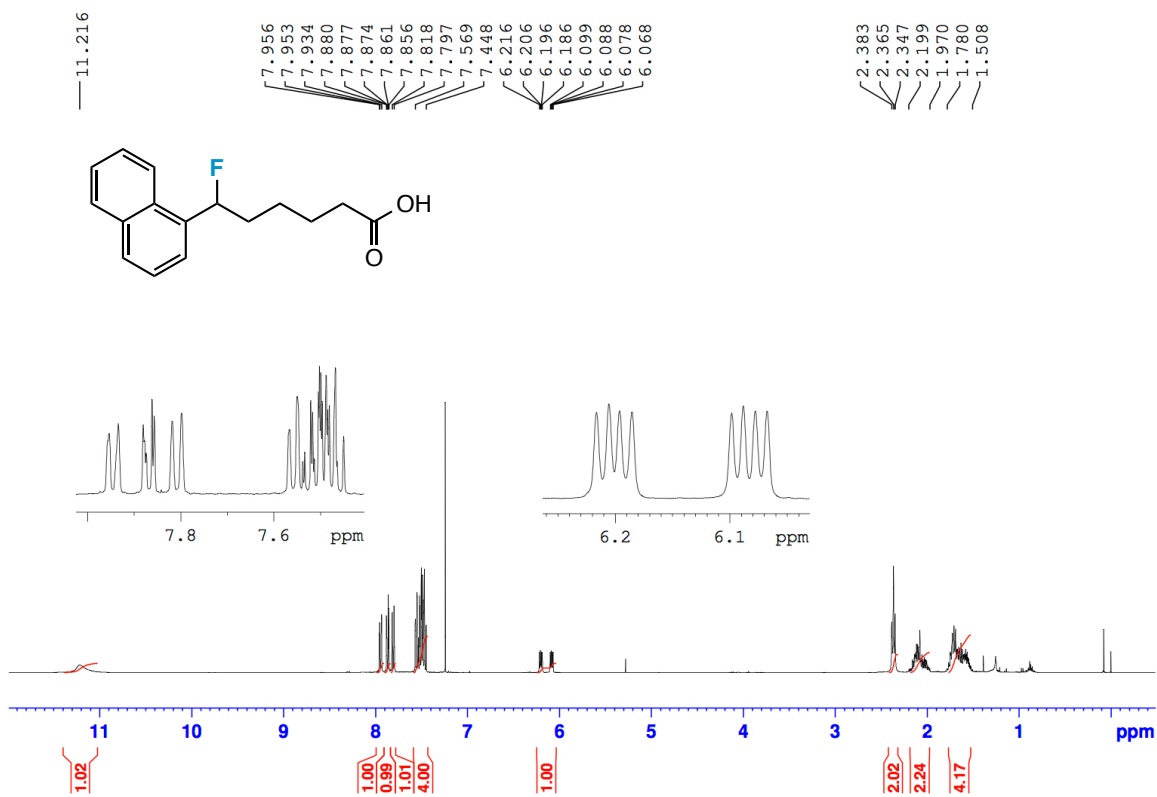

# 6-fluoro-6-(naphthalen-1-yl)hexanoic acid

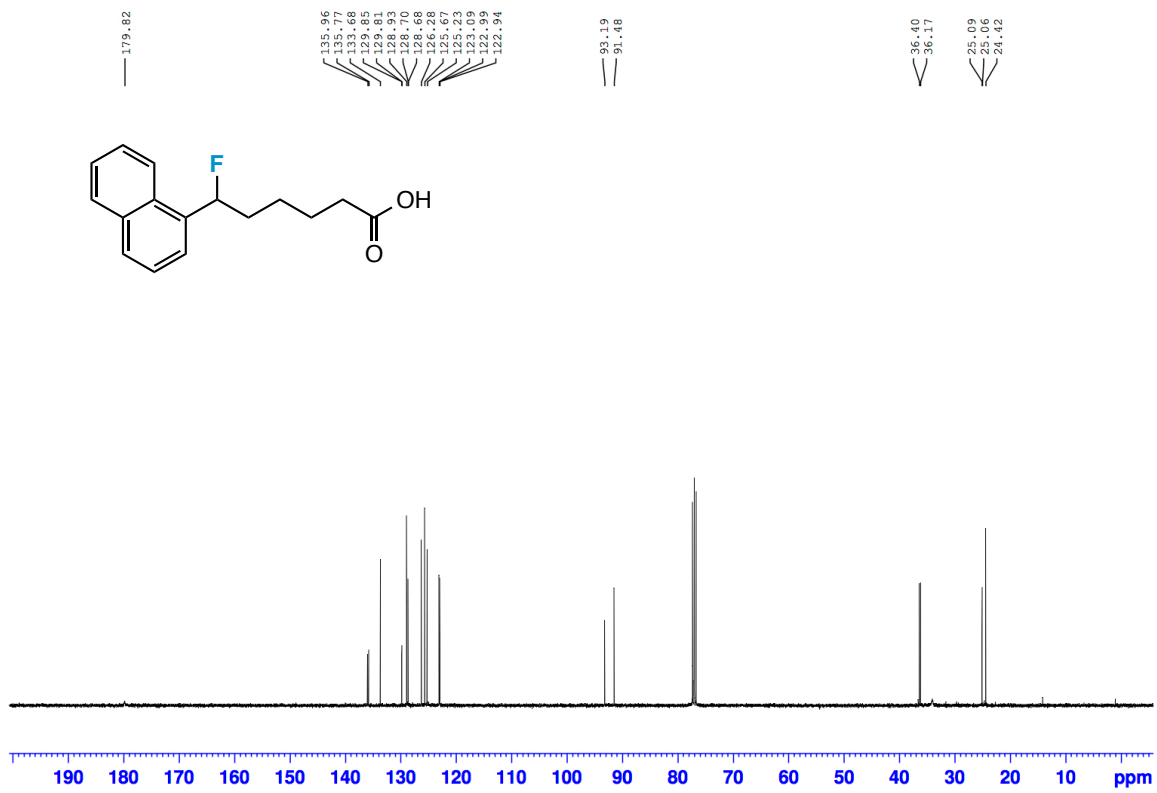

6-fluoro-6-(4-(2-phenyl-1,3-dioxolan-2-yl)phenyl)hexanoic acid

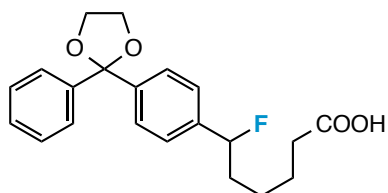

-175.73  
-175.79  
-175.83  
-175.96  
-176.06  
-176.06

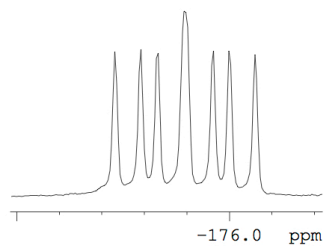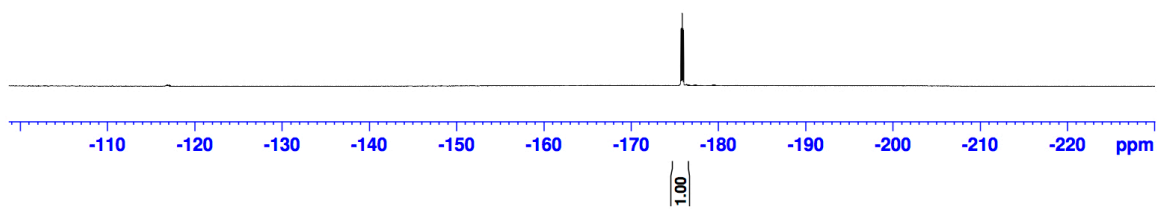

6-fluoro-6-(4-(2-phenyl-1,3-dioxolan-2-yl)phenyl)hexanoic acid

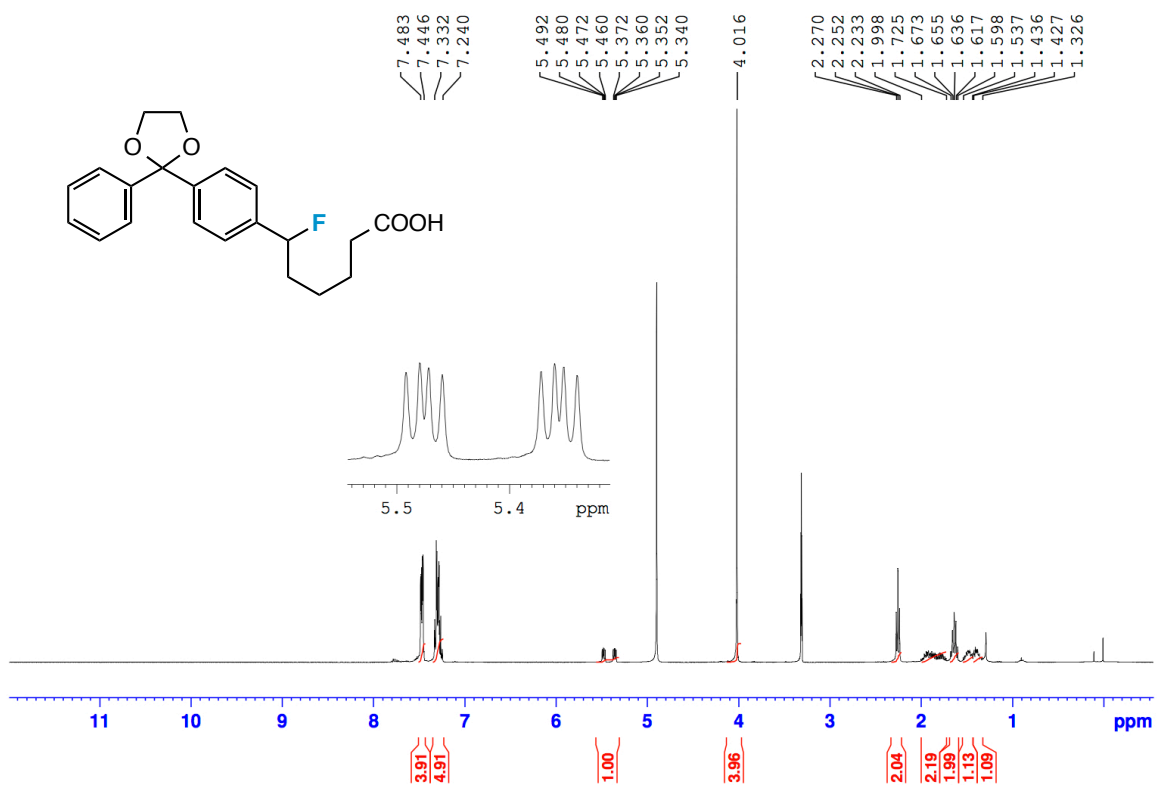

6-fluoro-6-(4-(2-phenyl-1,3-dioxolan-2-yl)phenyl)hexanoic acid

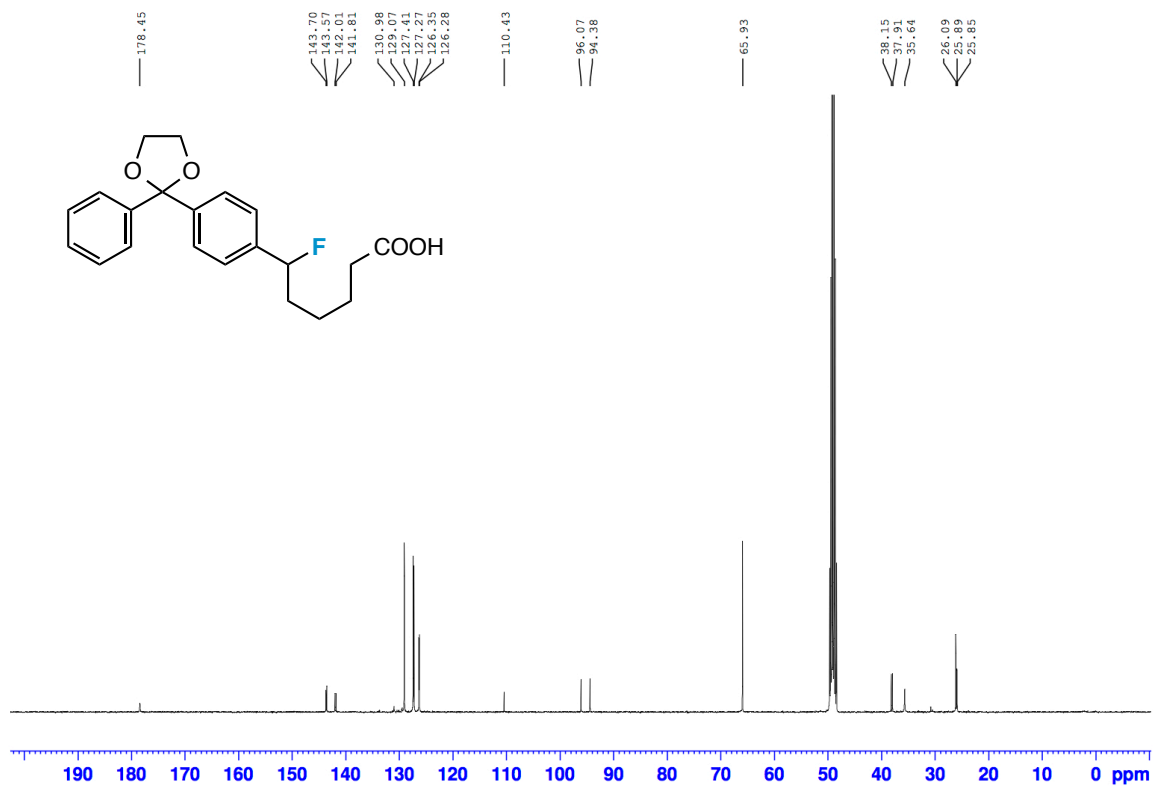

6-(4-acetylphenyl)-6-fluorohexanoic acid

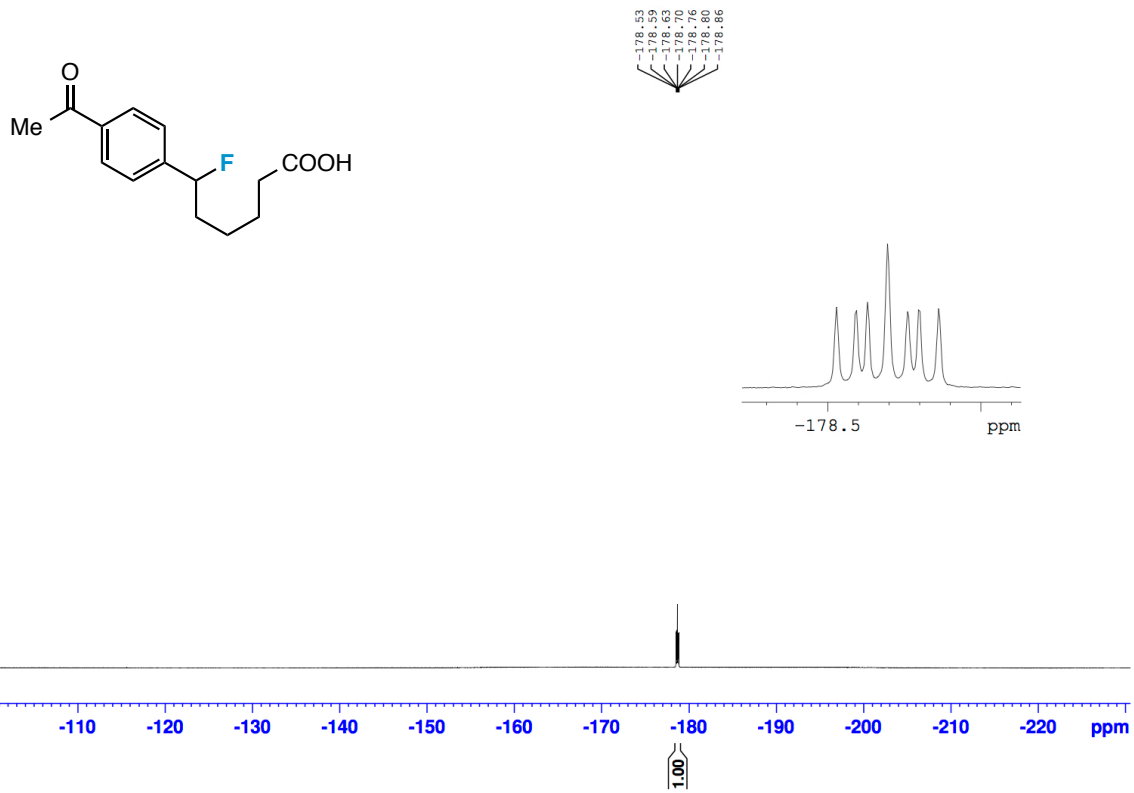



# 6-(4-acetylphenyl)-6-fluorohexanoic acid

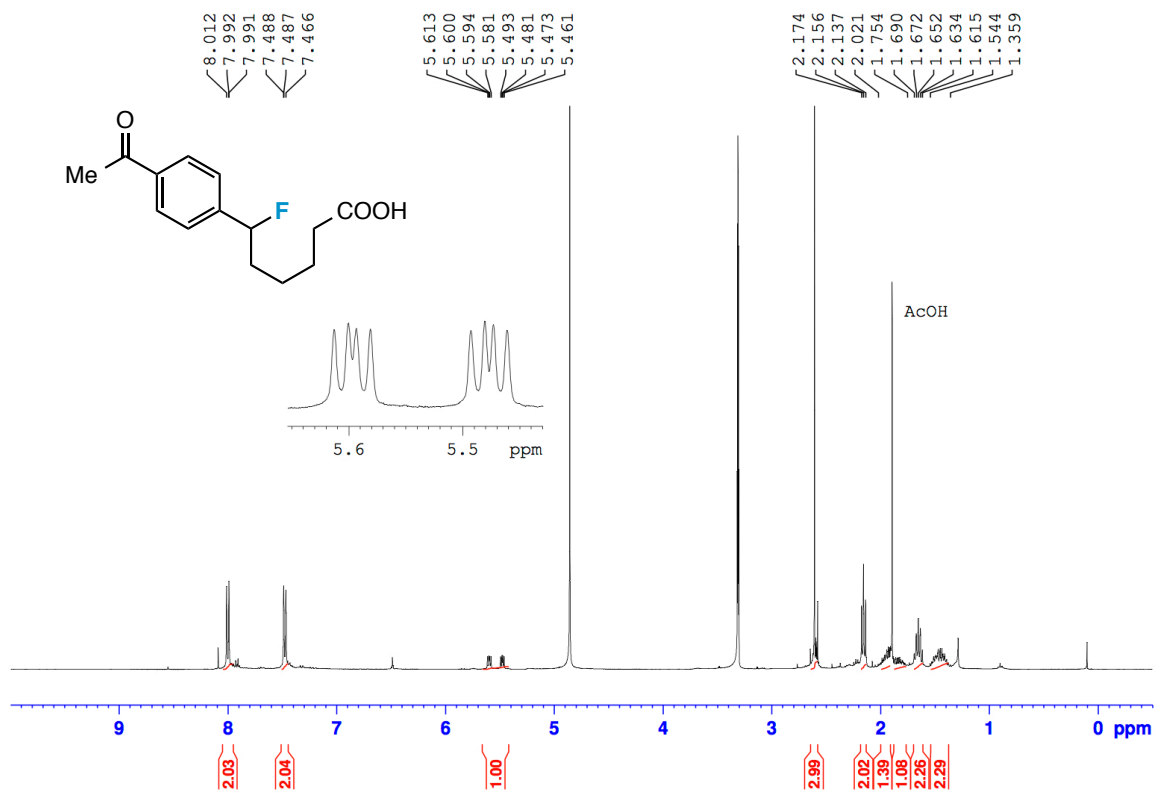

# 6-(4-acetylphenyl)-6-fluorohexanoic acid

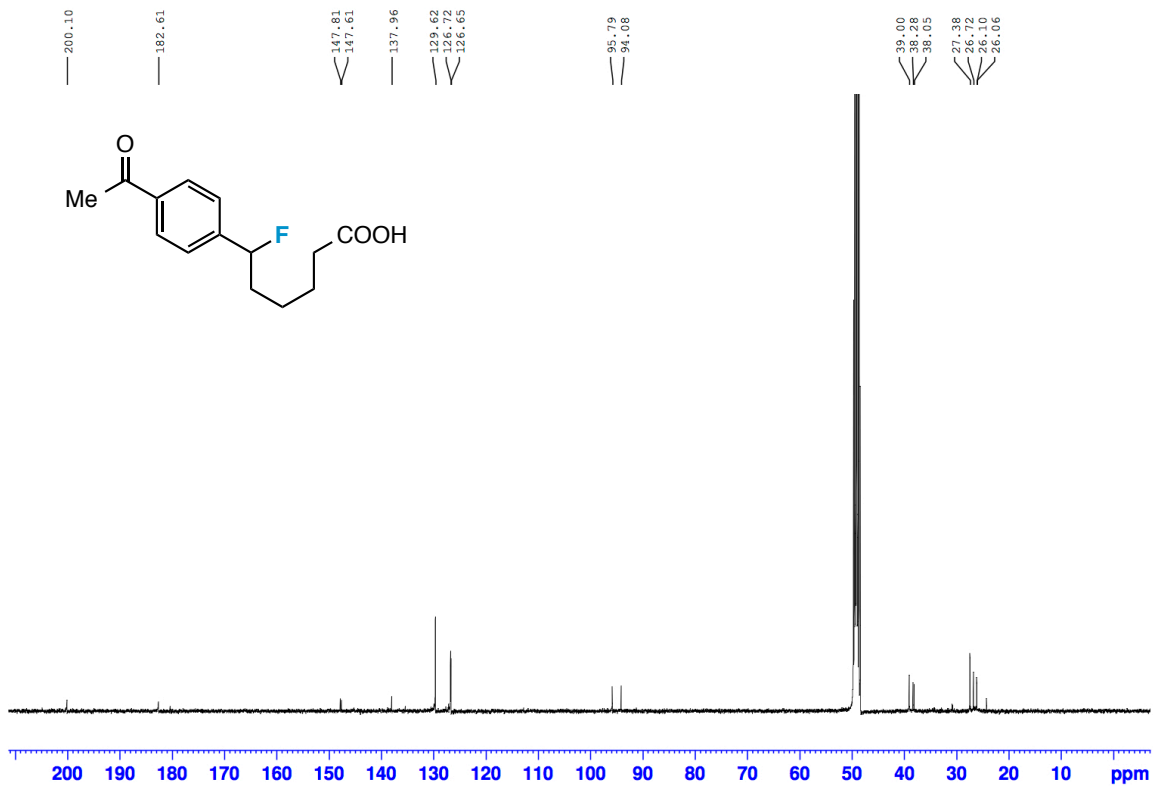

2-(3-fluoro-3-phenylpropyl)benzoic acid

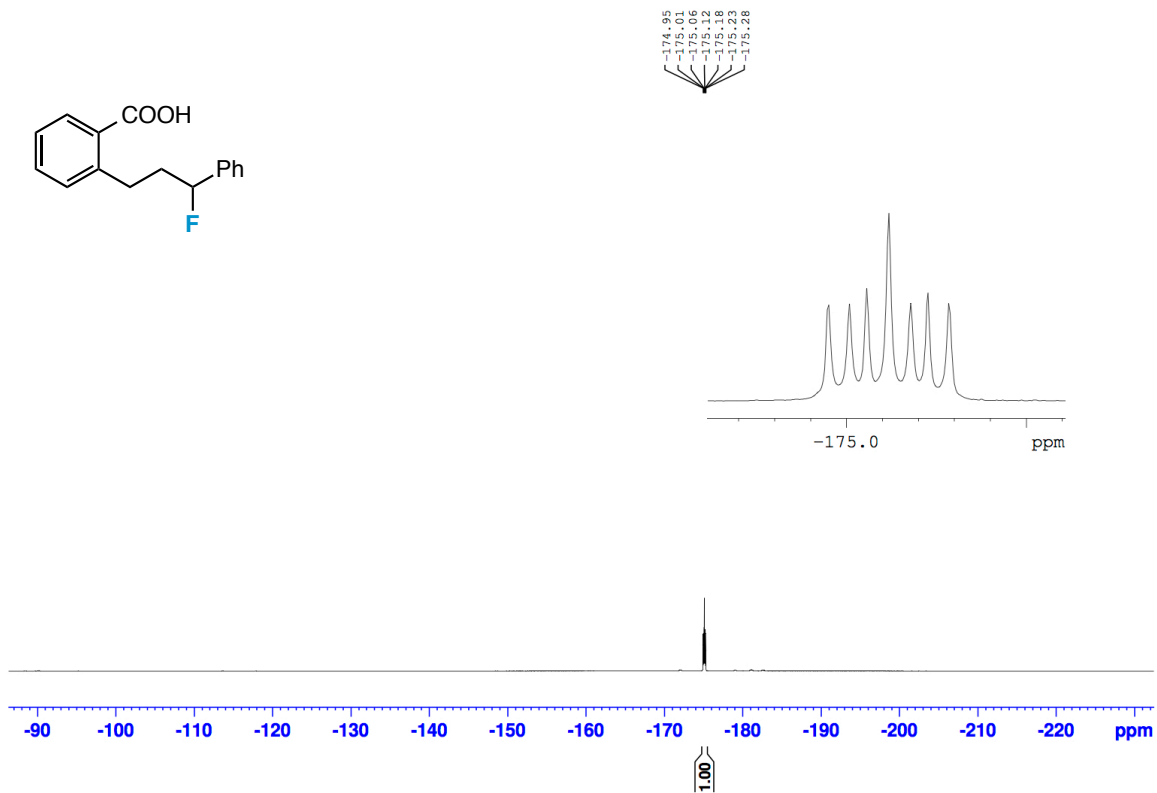

# 2-(3-fluoro-3-phenylpropyl)benzoic acid

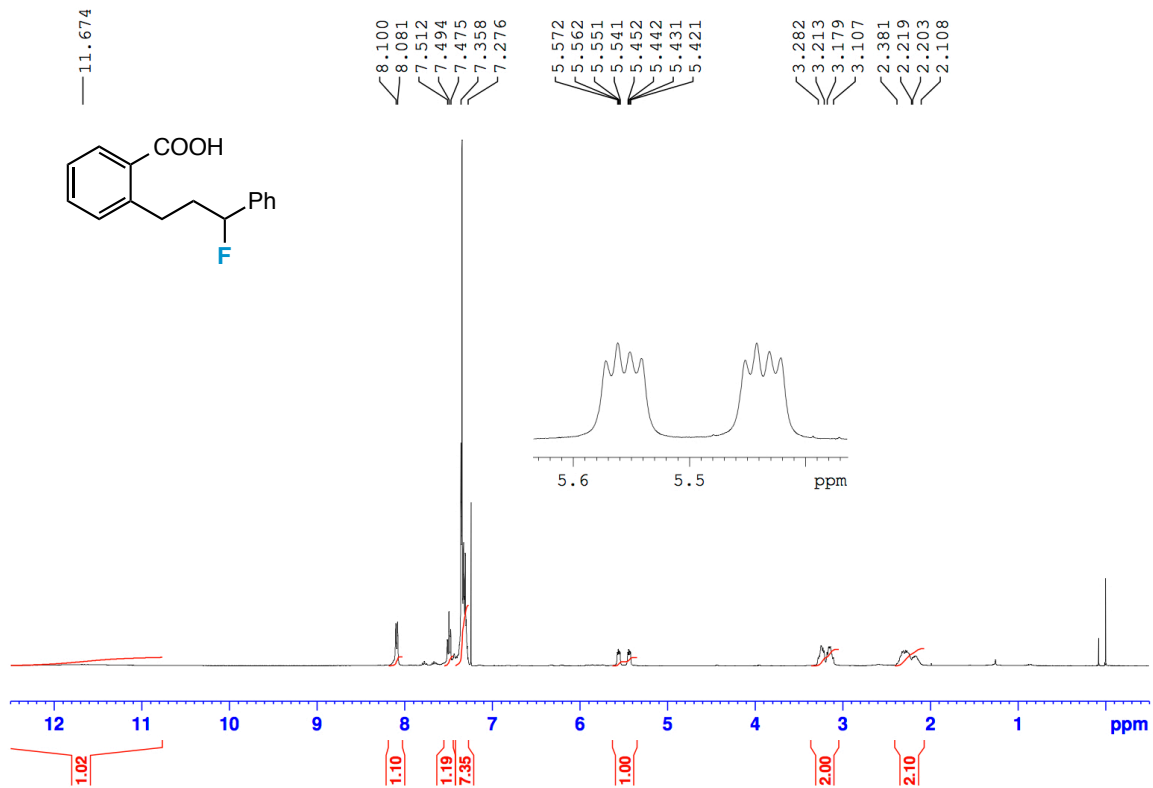

# 2-(3-fluoro-3-phenylpropyl)benzoic acid

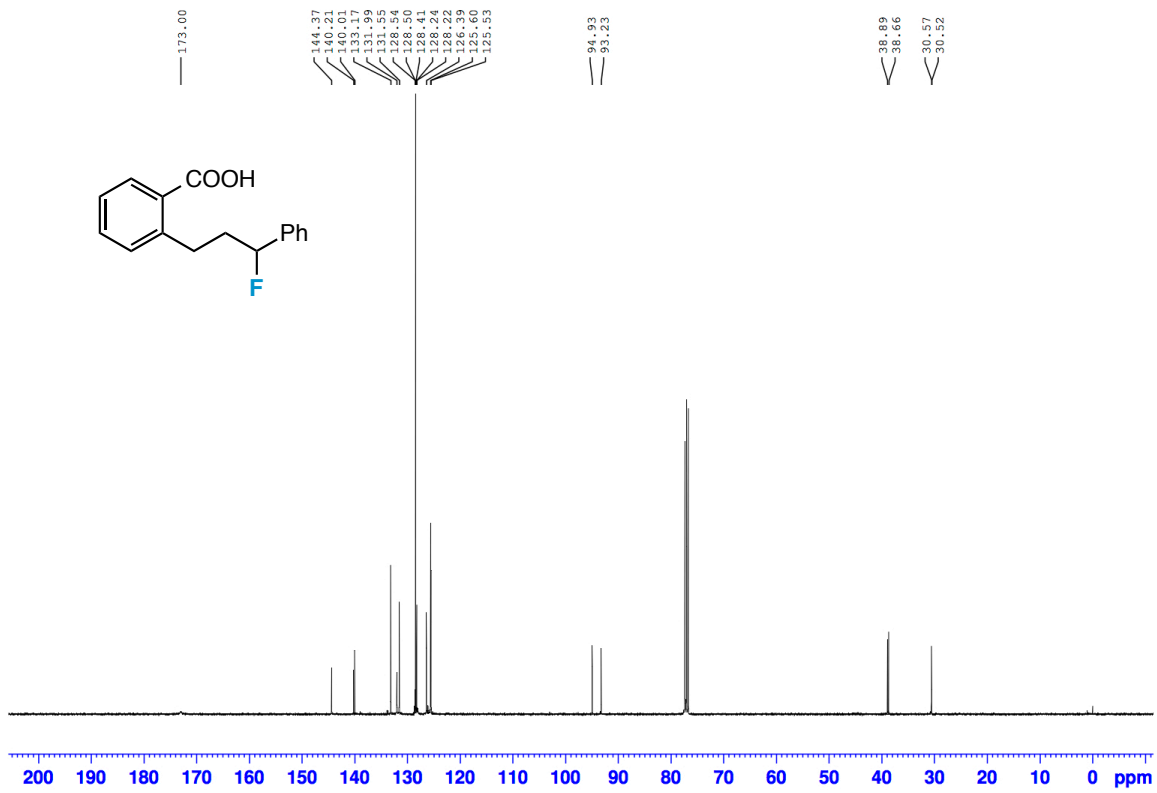

*cis*-2-(3-fluoro-3-phenylpropyl)cyclohexane-1-carboxylic acid

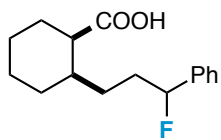

1:1 Mixture of Diastereomers

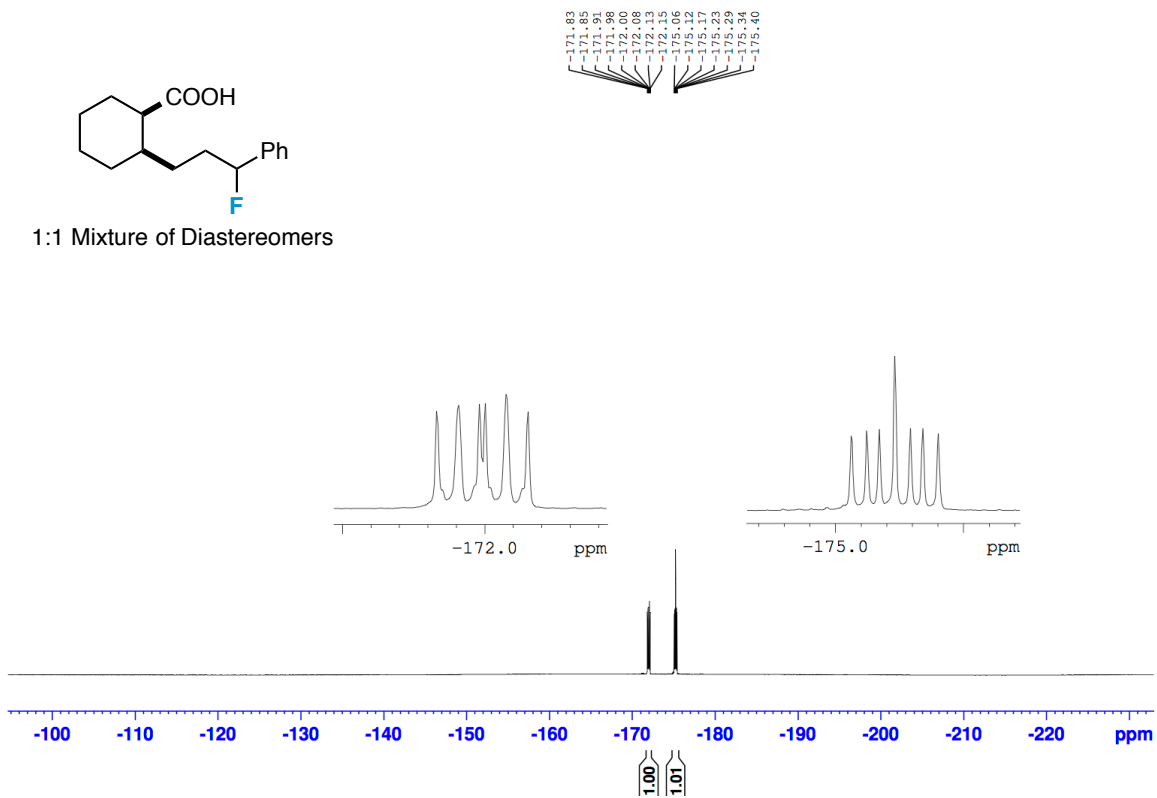

*cis*-2-(3-fluoro-3-phenylpropyl)cyclohexane-1-carboxylic acid

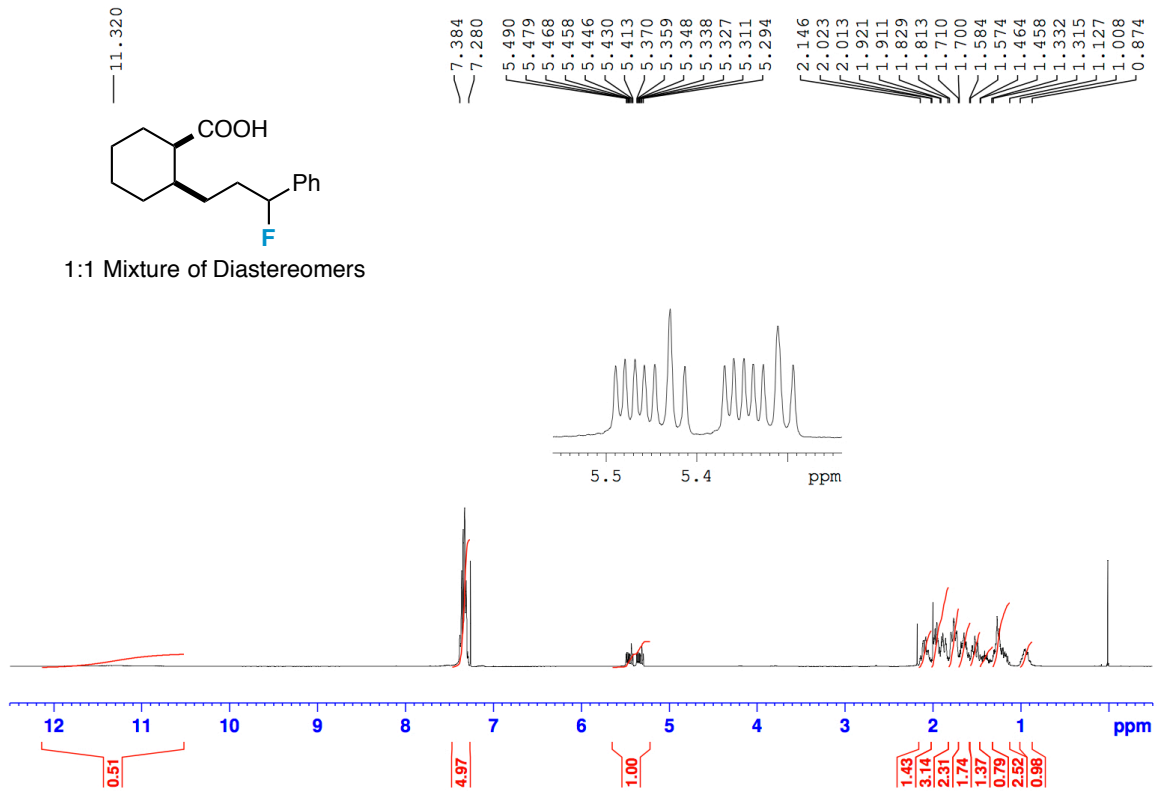

*cis*-2-(3-fluoro-3-phenylpropyl)cyclohexane-1-carboxylic acid

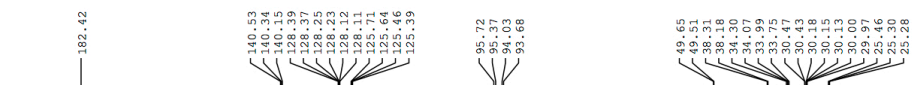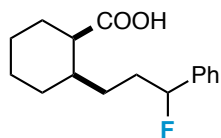

1:1 Mixture of Diastereomers

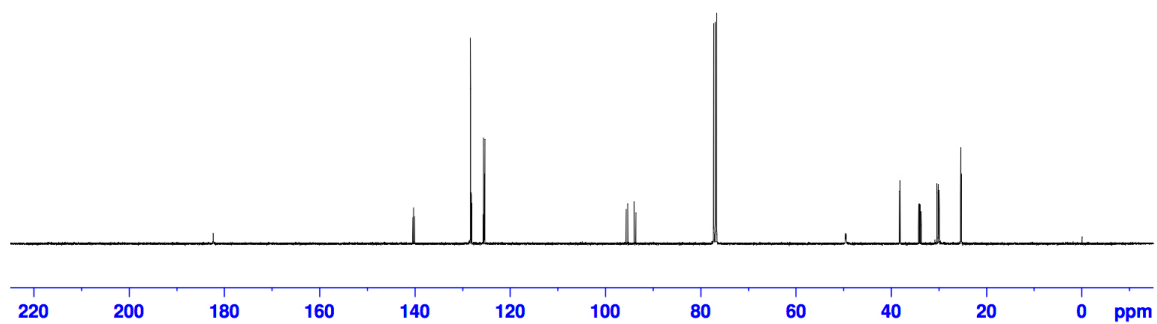



# 6-fluoro-2,6-diphenylhexanoic acid

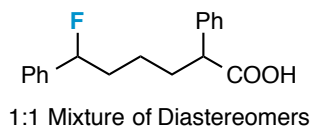

-173.99  
-174.05  
-174.08  
-174.16  
-174.22  
-174.26  
-174.28  
-174.38  
-174.39  
-174.45  
-174.49  
-174.55

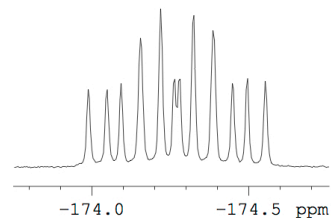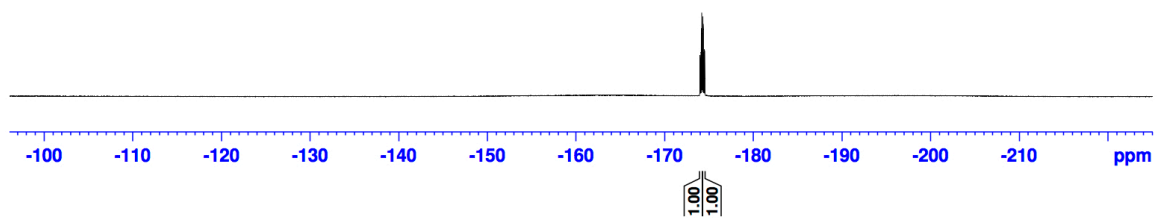

6-fluoro-2,6-diphenylhexanoic acid

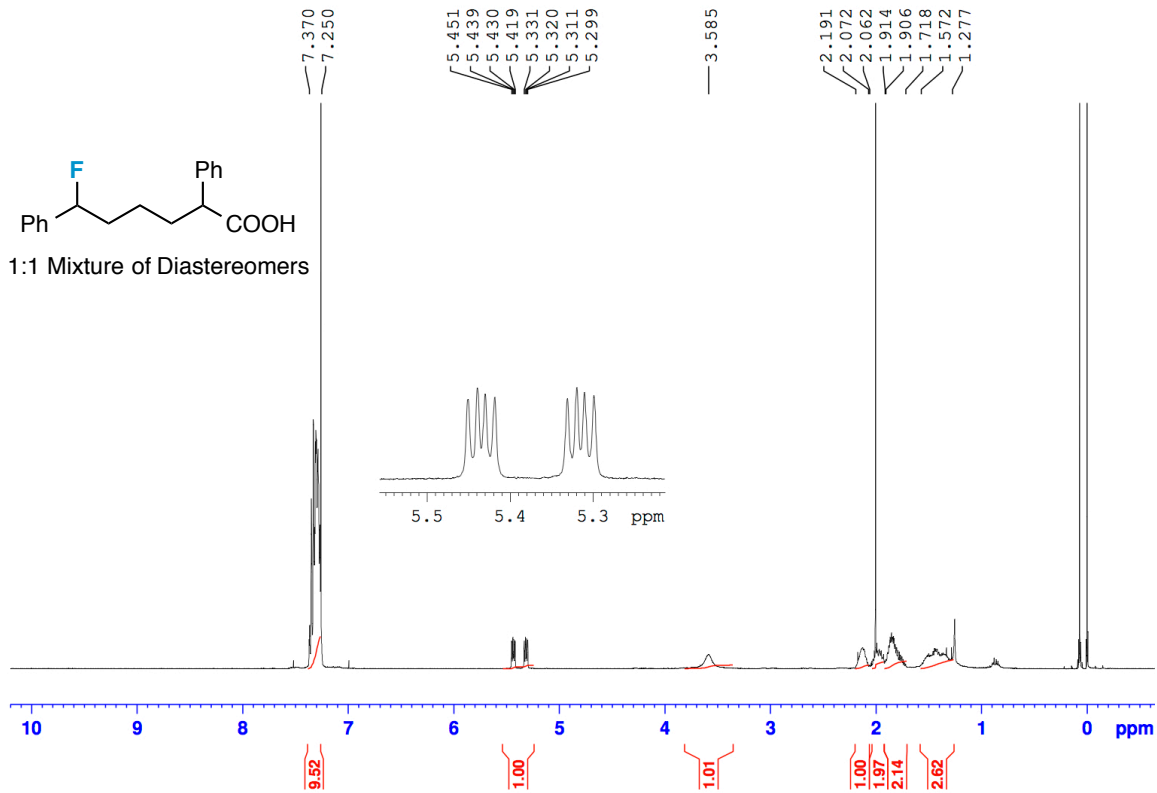

# 6-fluoro-2,6-diphenylhexanoic acid

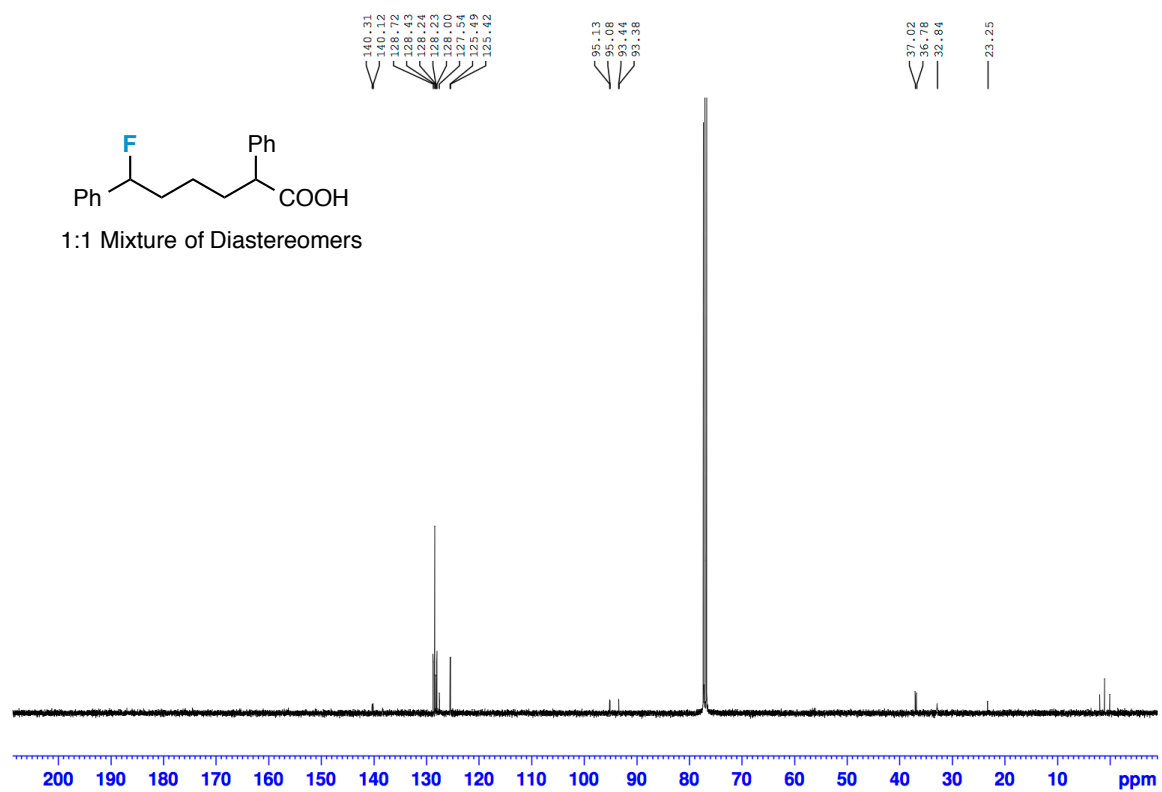

6-fluoro-1,6-diphenyl-hexanone

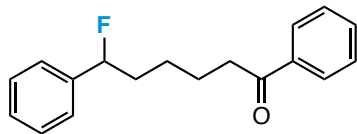

-173.95  
-174.01  
-174.05  
-174.12  
-174.18  
-174.22  
-174.28

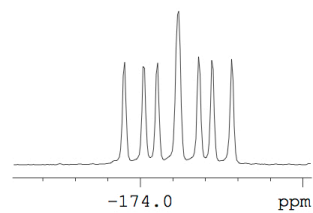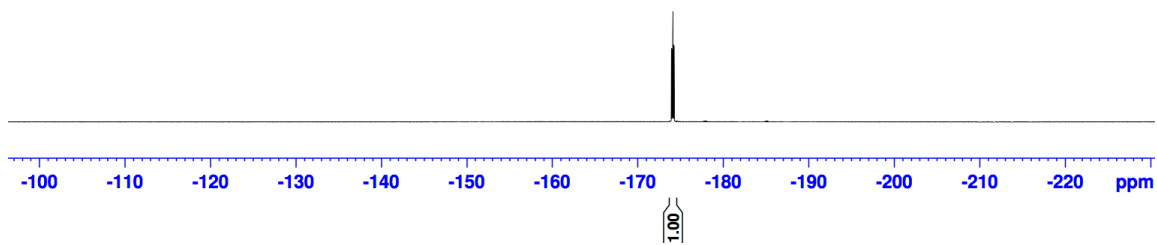

# 6-fluoro-1,6-diphenyl-hexanone

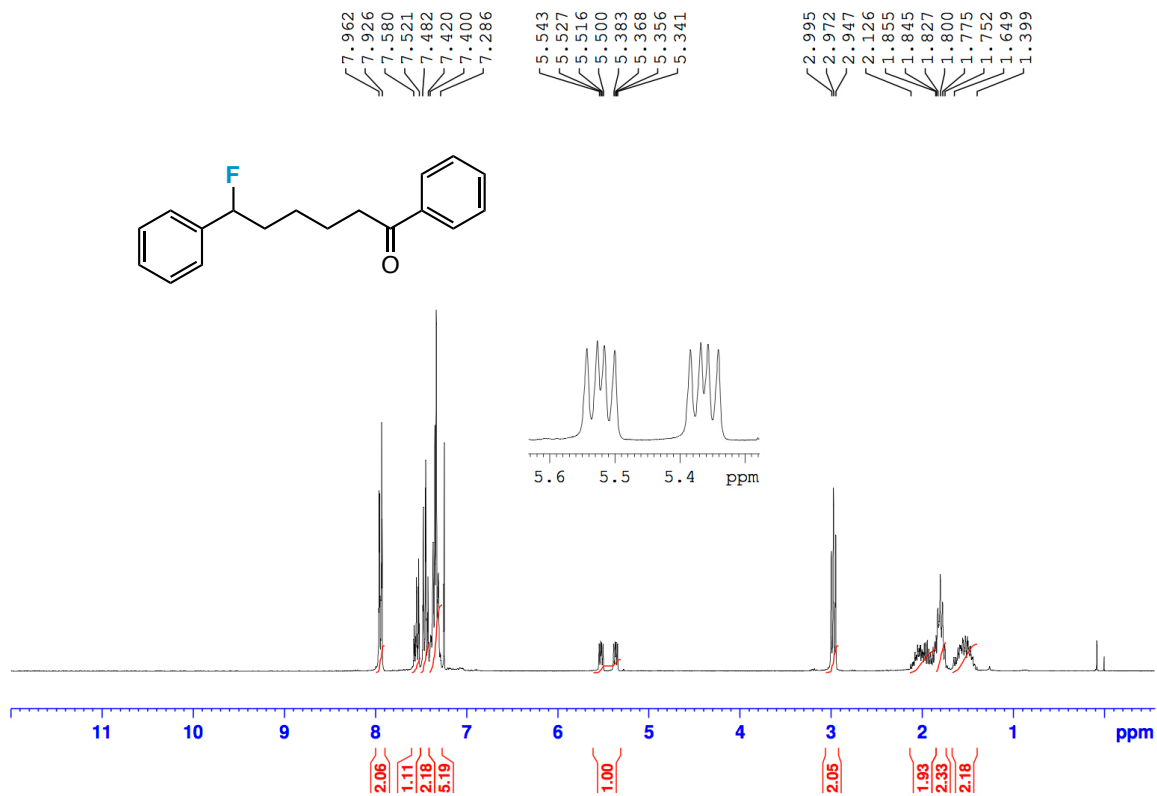

# 6-fluoro-1,6-diphenyl-hexanone

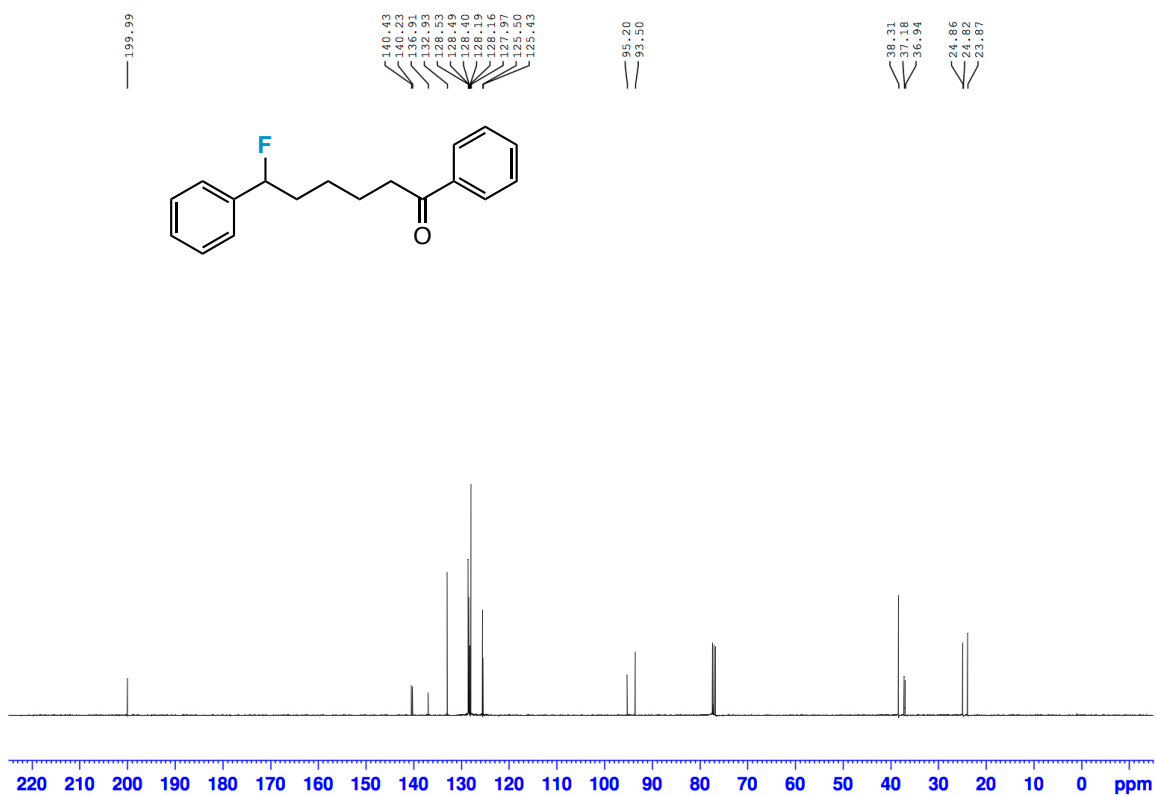

5-fluoro-5-phenylpentanoic acid

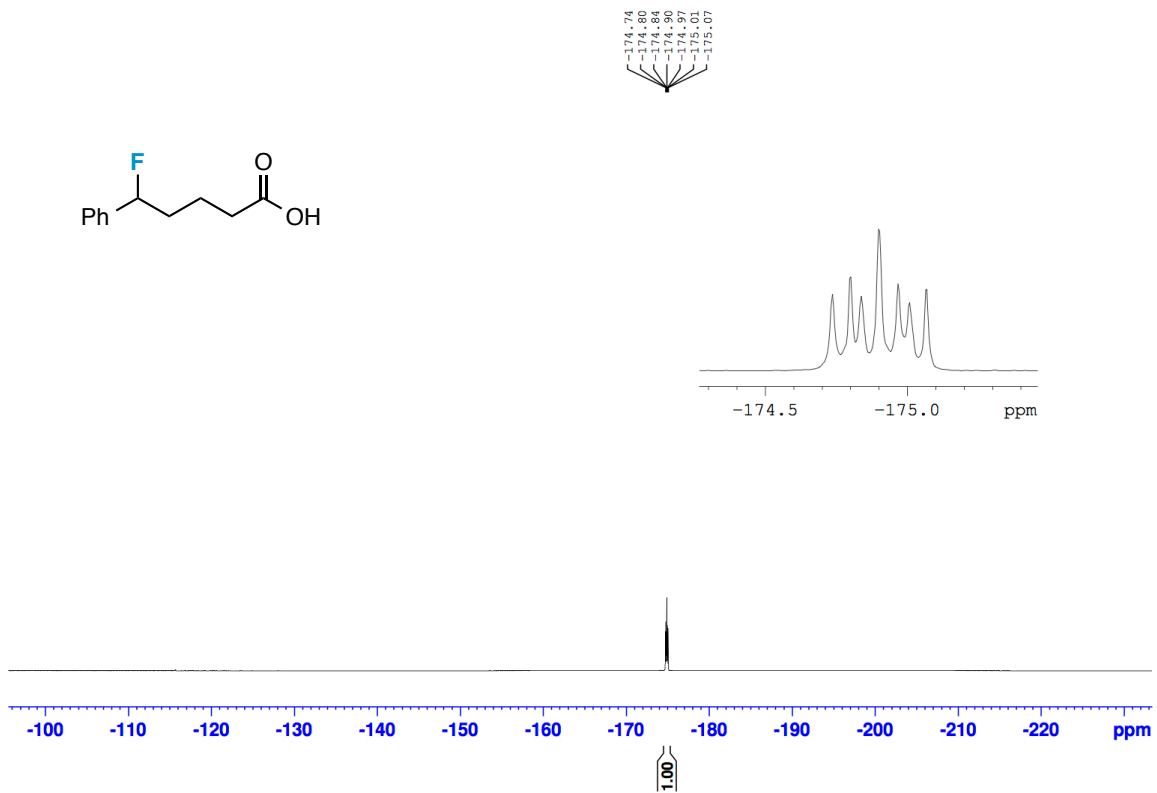

# 5-fluoro-5-phenylpentanoic acid

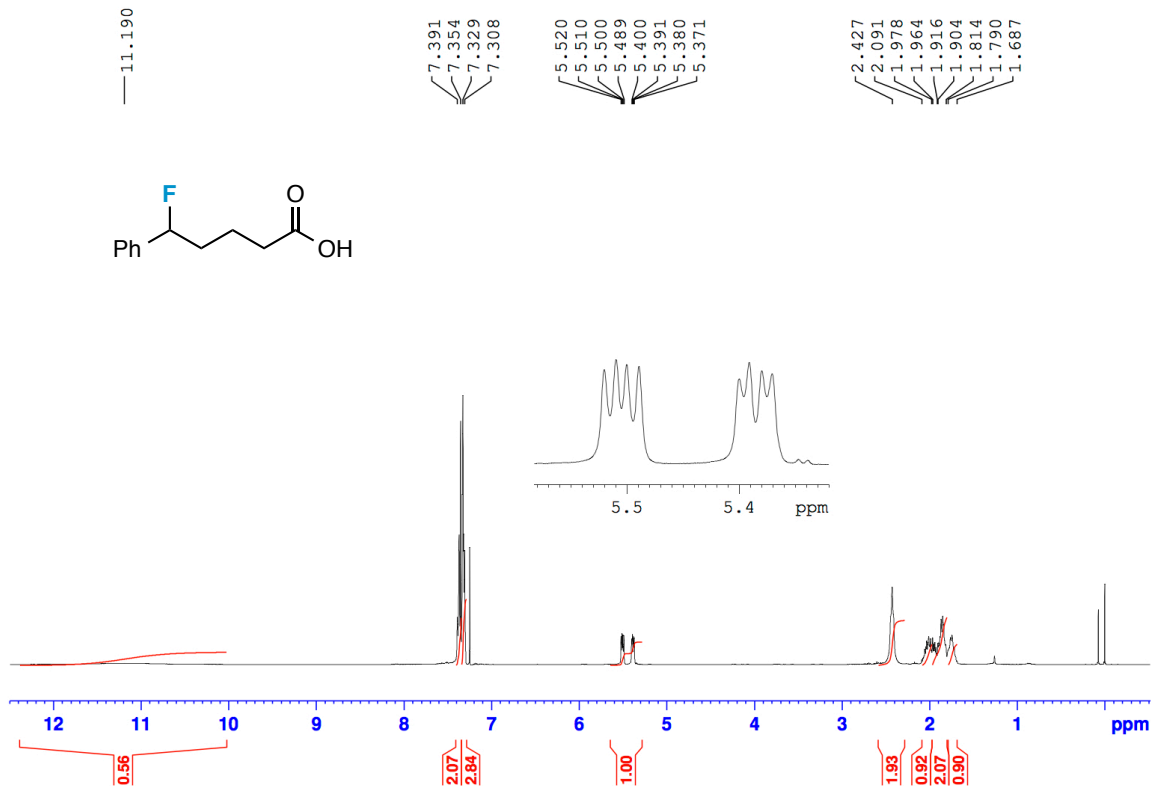



# 5-fluoro-5-phenylpentanoic acid

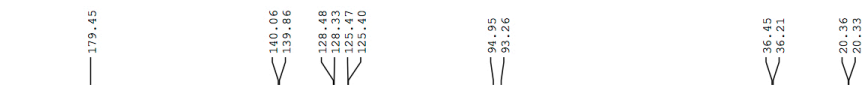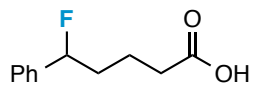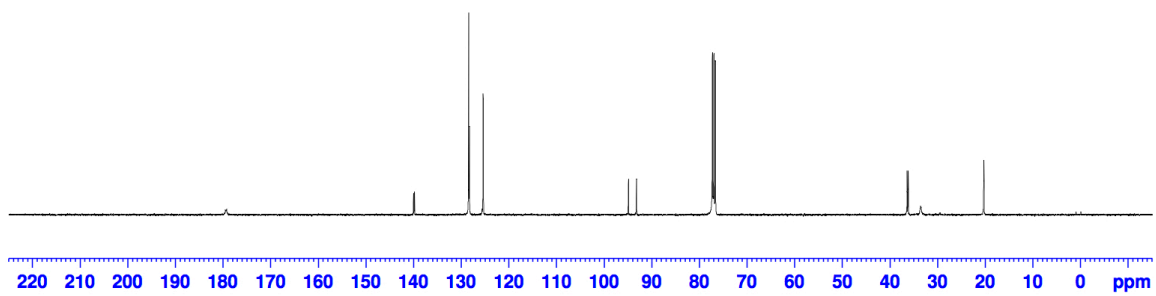

7-fluoro-7-phenylheptanoic acid

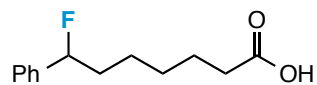

-173.88  
-173.84  
-173.80  
-174.05  
-174.11  
-174.15  
-174.21

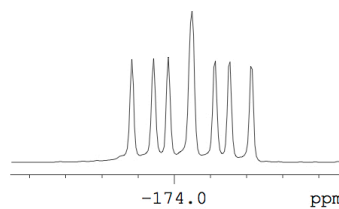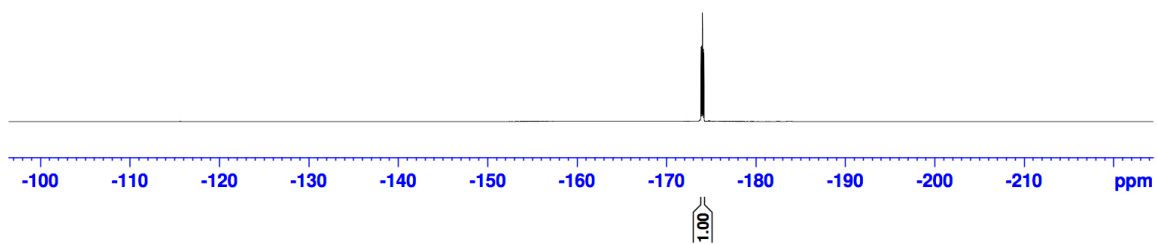

# 7-fluoro-7-phenylheptanoic acid

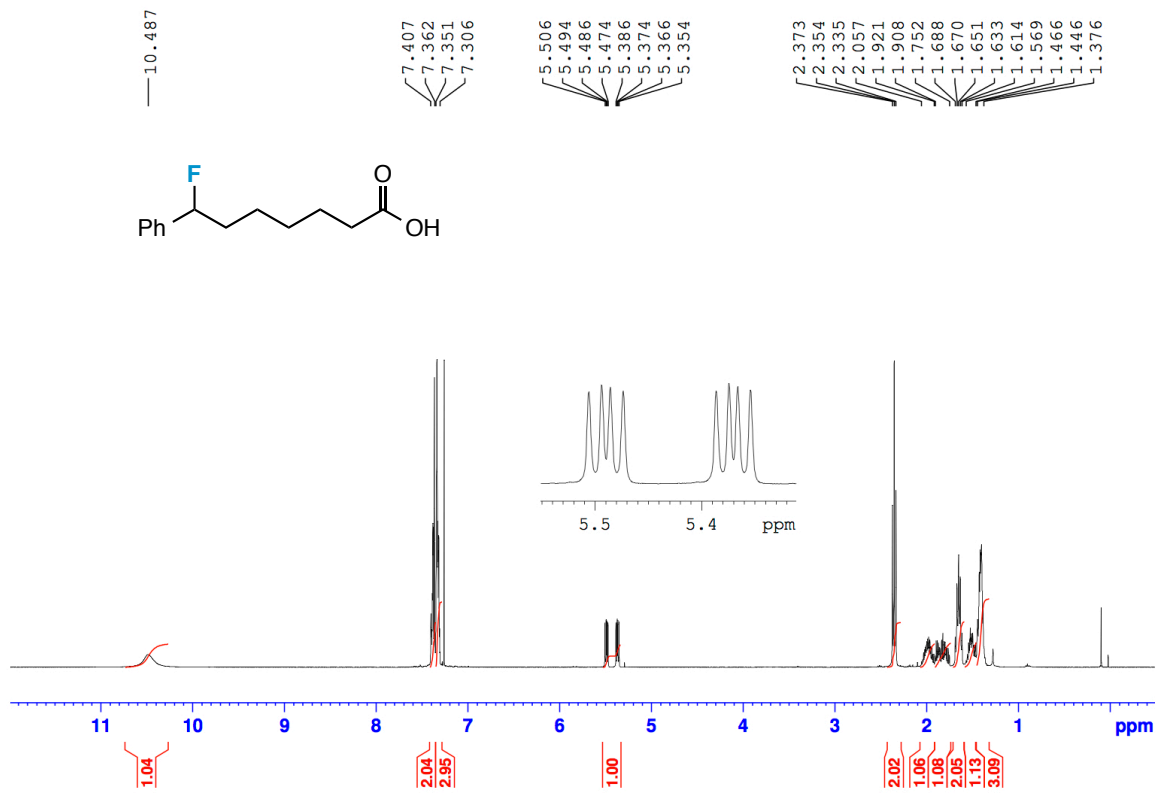

# 7-fluoro-7-phenylheptanoic acid

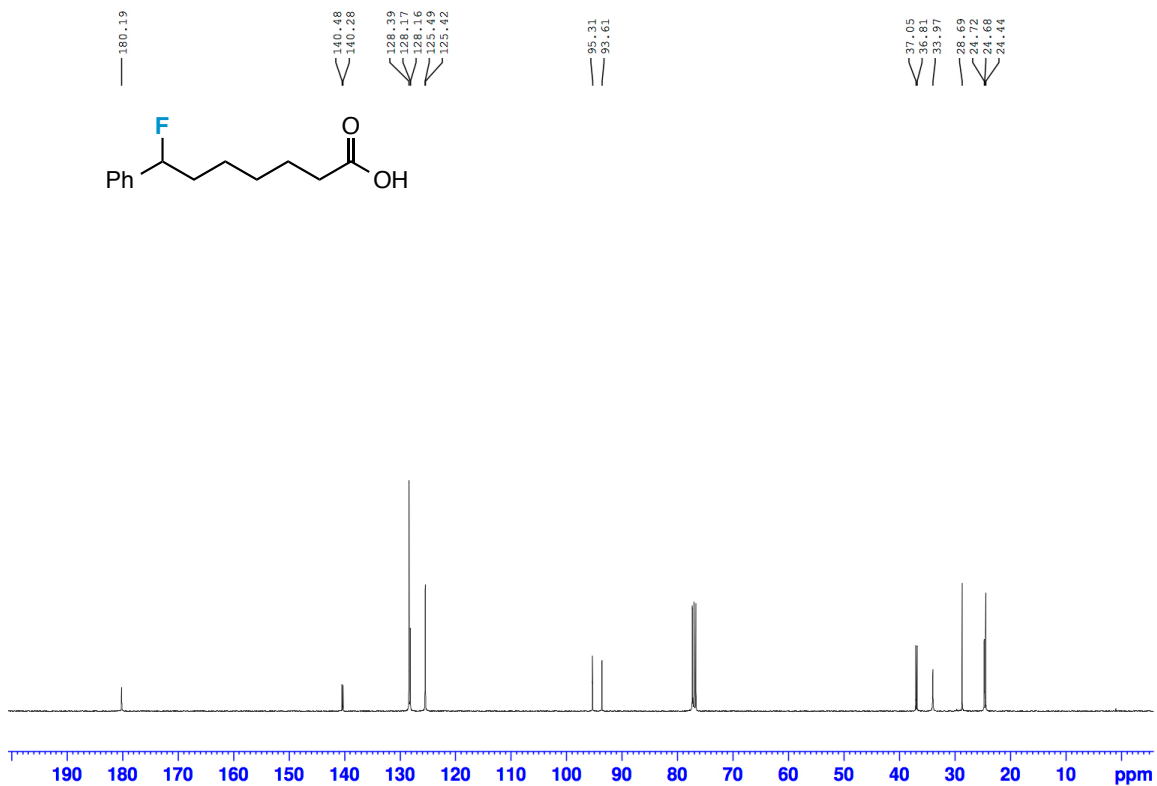

# 8-fluoro-8-phenyloctanoic acid

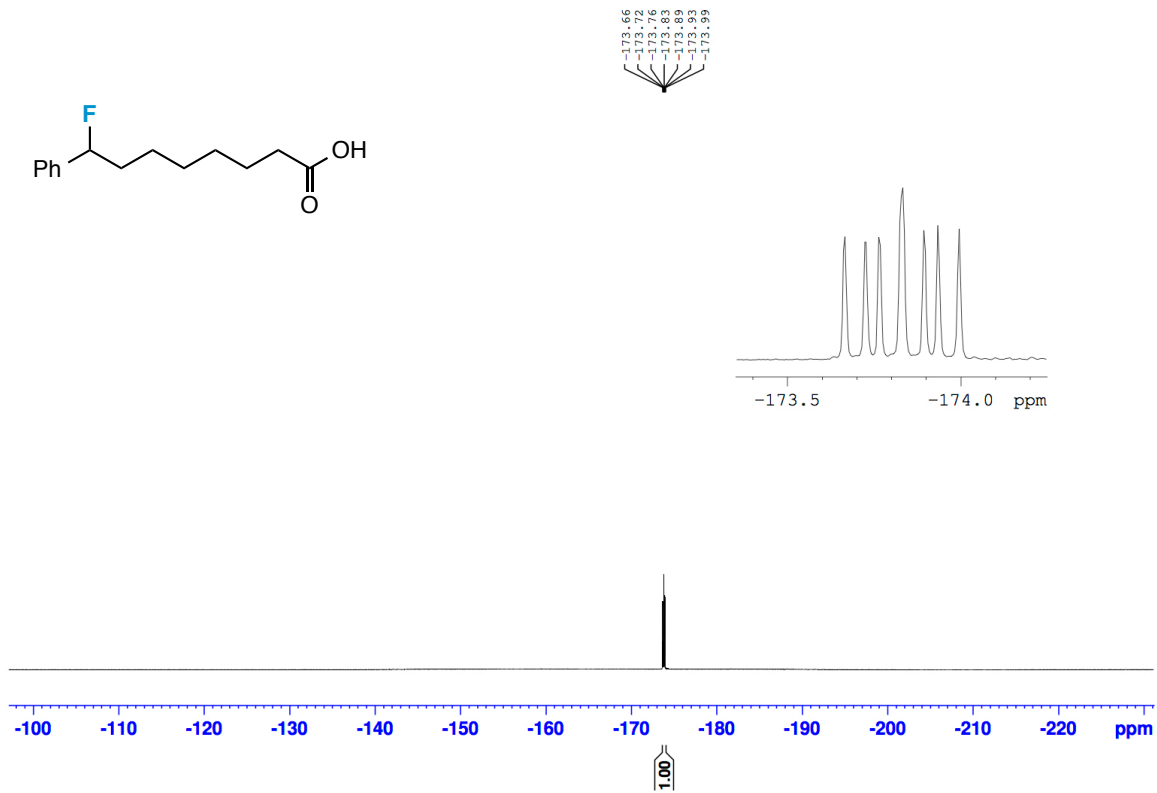

# 8-fluoro-8-phenyloctanoic acid

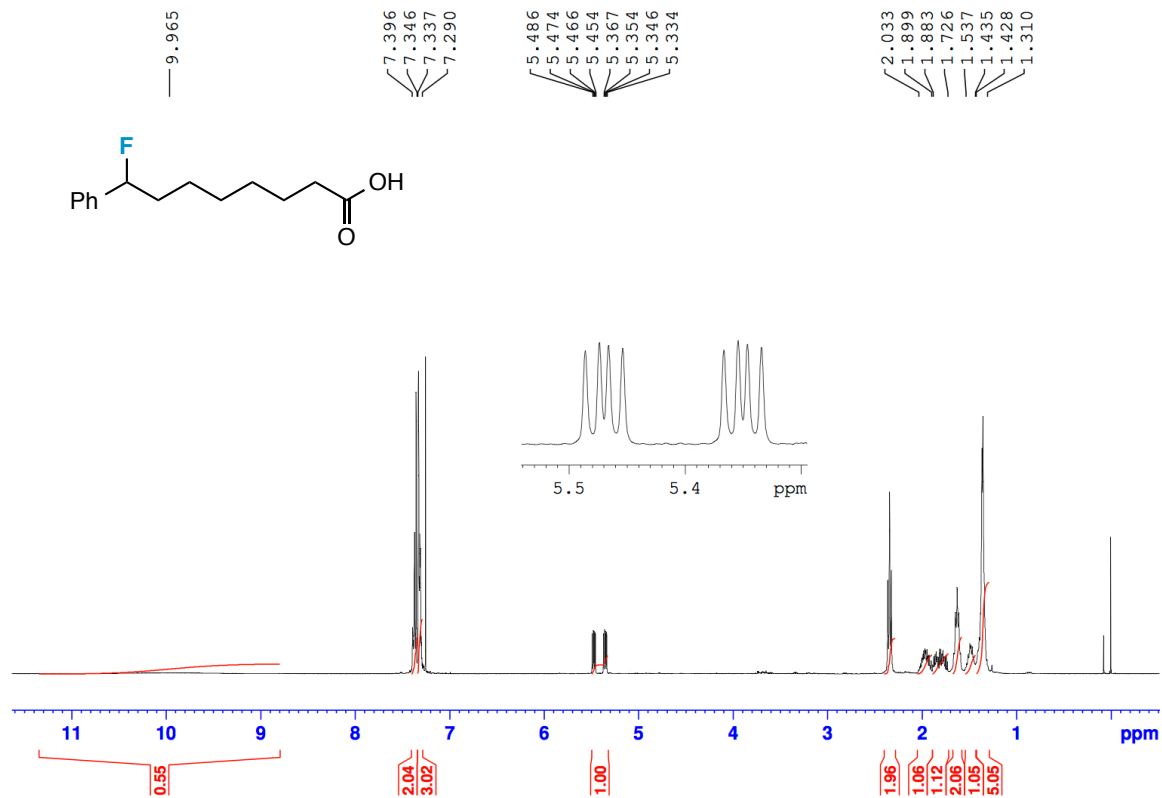

# 8-fluoro-8-phenyloctanoic acid

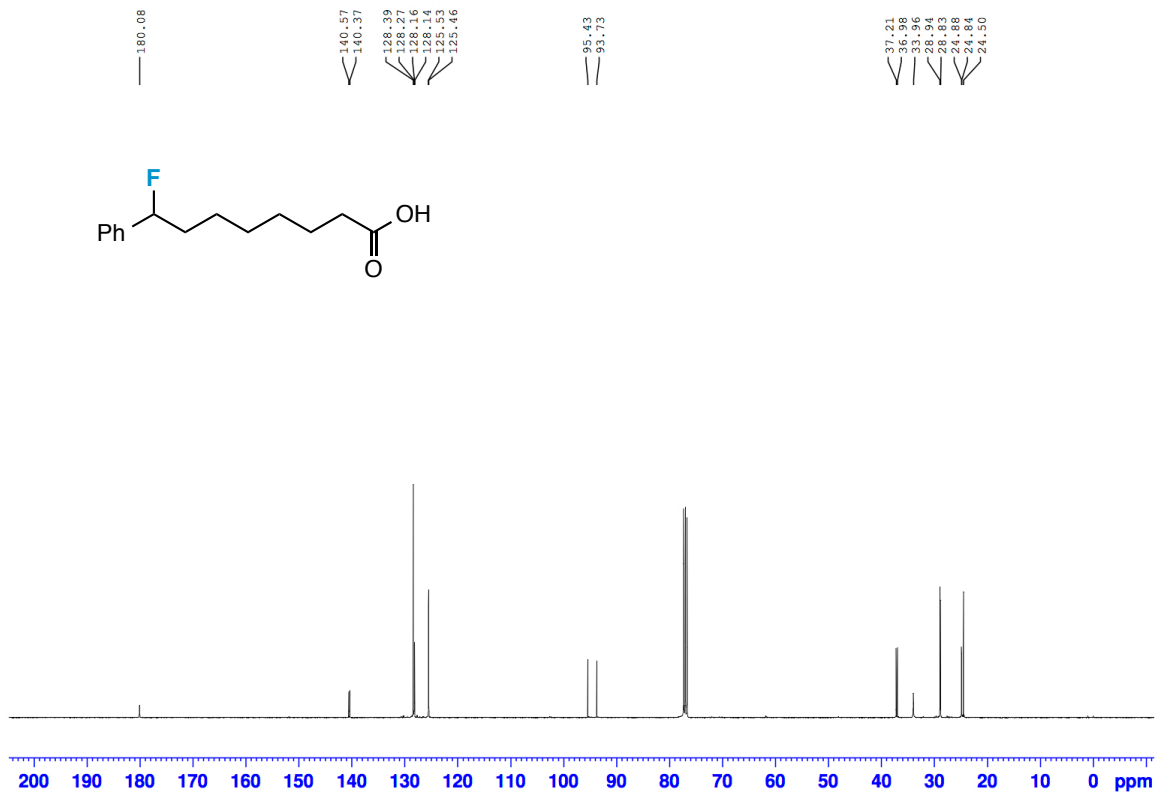

12-fluoro-12-phenyldodecanoic acid

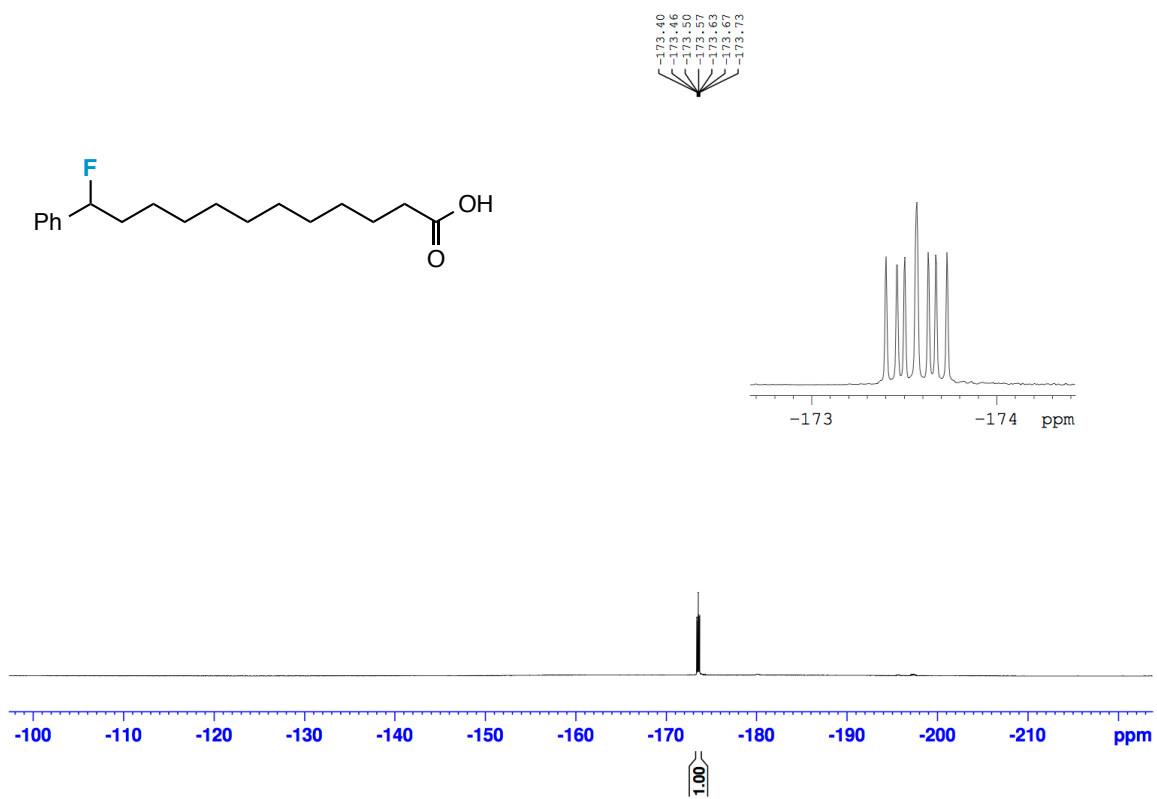



# 12-fluoro-12-phenyldodecanoic acid

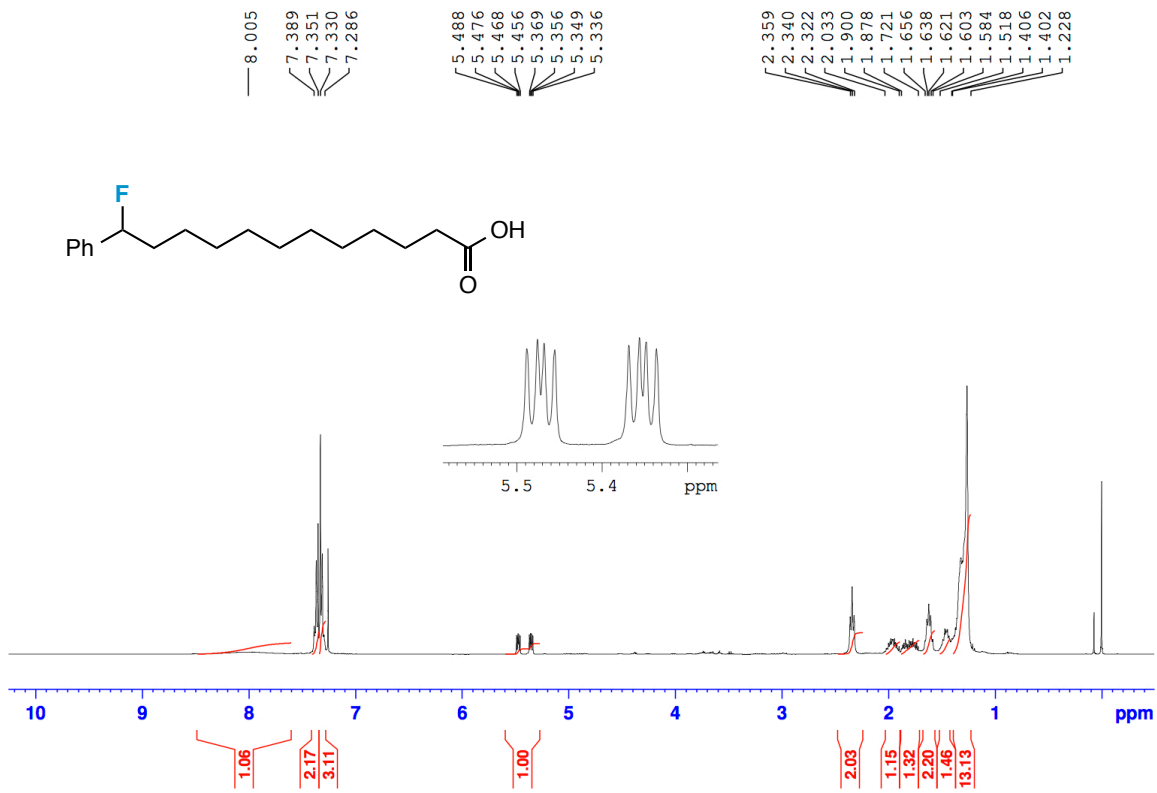

# 12-fluoro-12-phenyldodecanoic acid

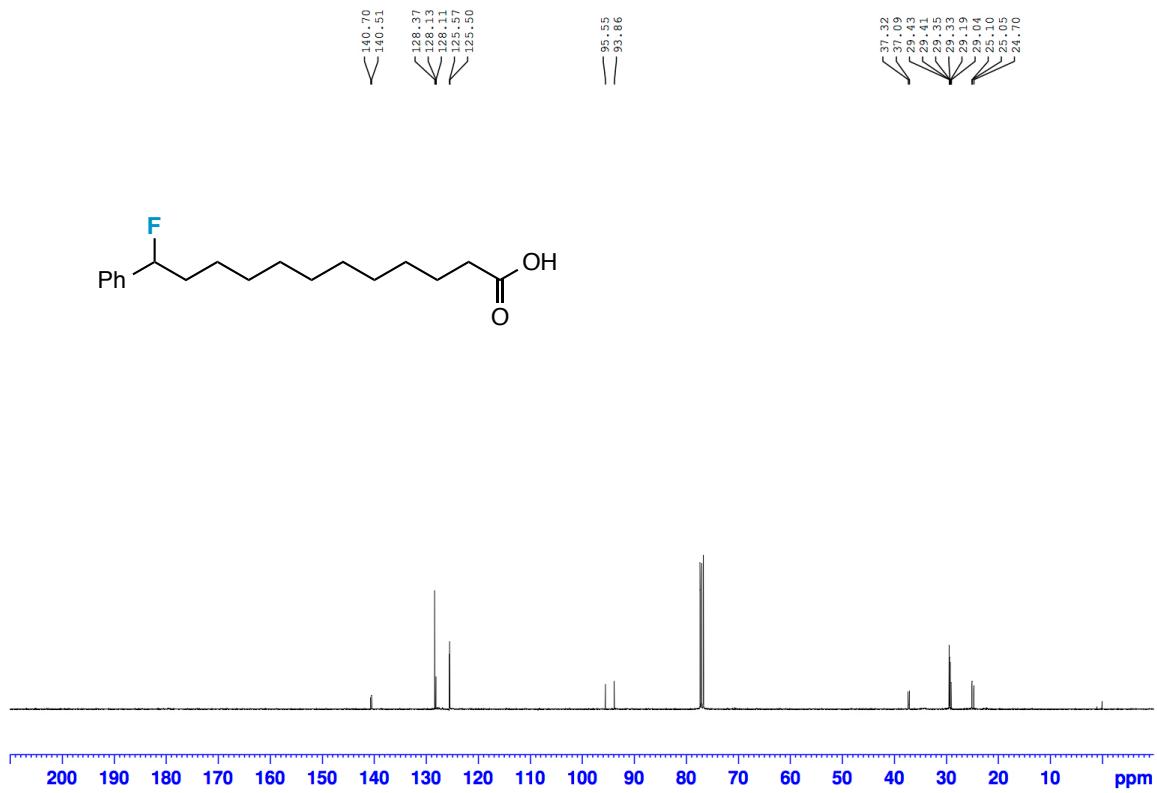

## Intermolecular Competition (tBu vs. H)

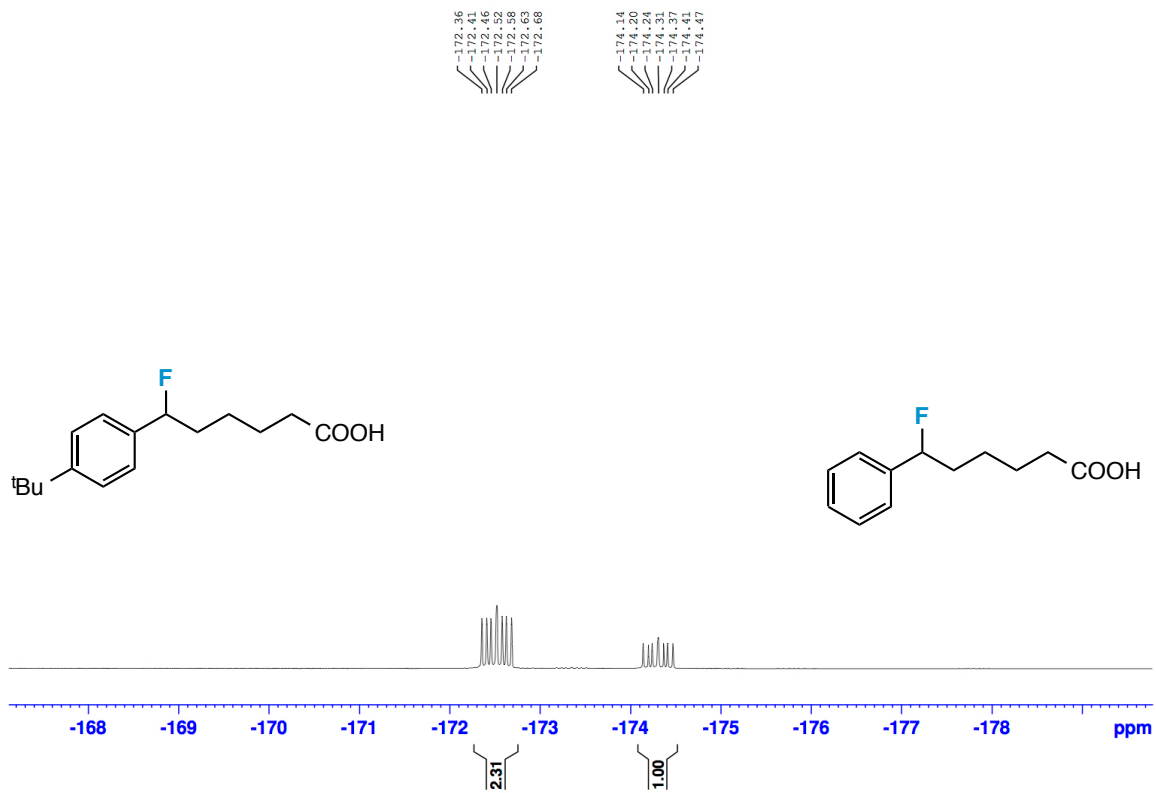

$^{19}\text{F}$  NMR ( $\text{CDCl}_3$ ): -172.52 (1F, ddd,  $J = 47.0, 28.7, 16.1$  Hz), -174.31 (1F, ddd,  $J = 47.0, 28.7, 16.1$  Hz).

# Intermolecular Competition (Cl vs. H)

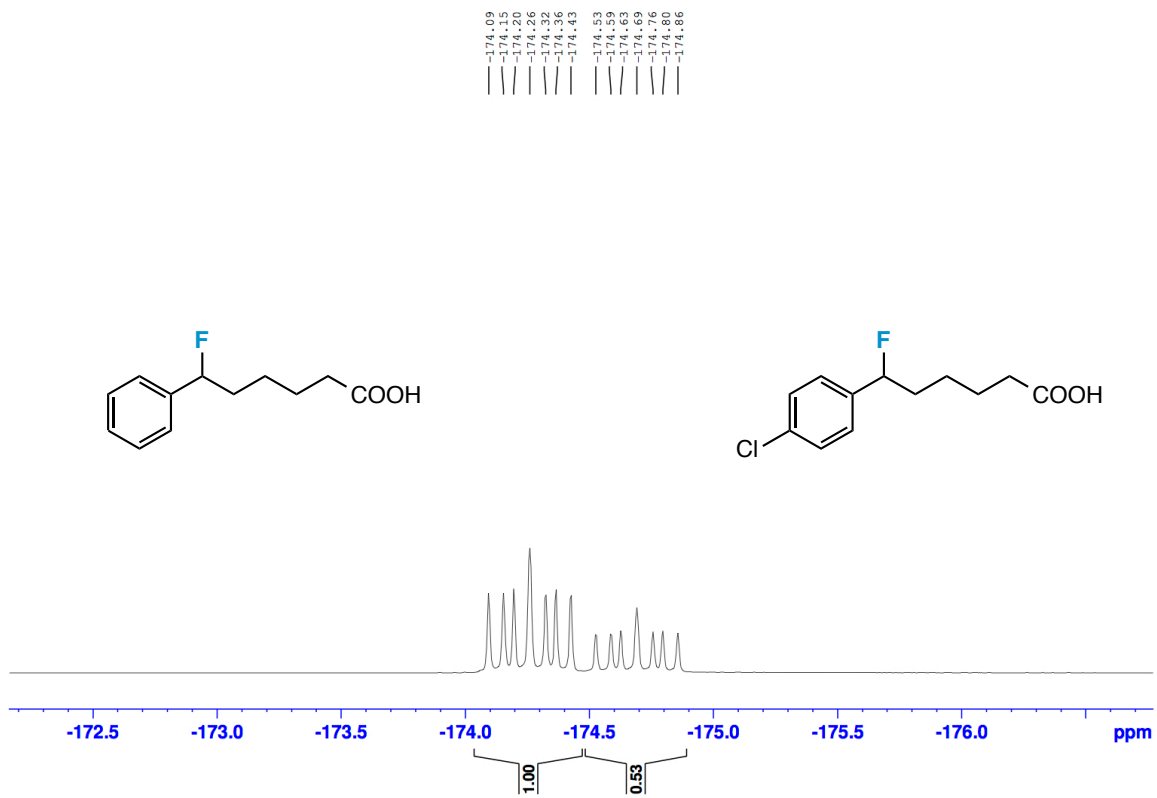

<sup>19</sup>F NMR (CDCl<sub>3</sub>): -174.31 (1F, ddd,  $J = 47.0, 28.7, 17.2$  Hz), -174.74 (1F, ddd,  $J = 47.0, 28.7, 17.2$  Hz).

Intermolecular Competition (CF<sub>3</sub> vs. H) – Crude Spectrum

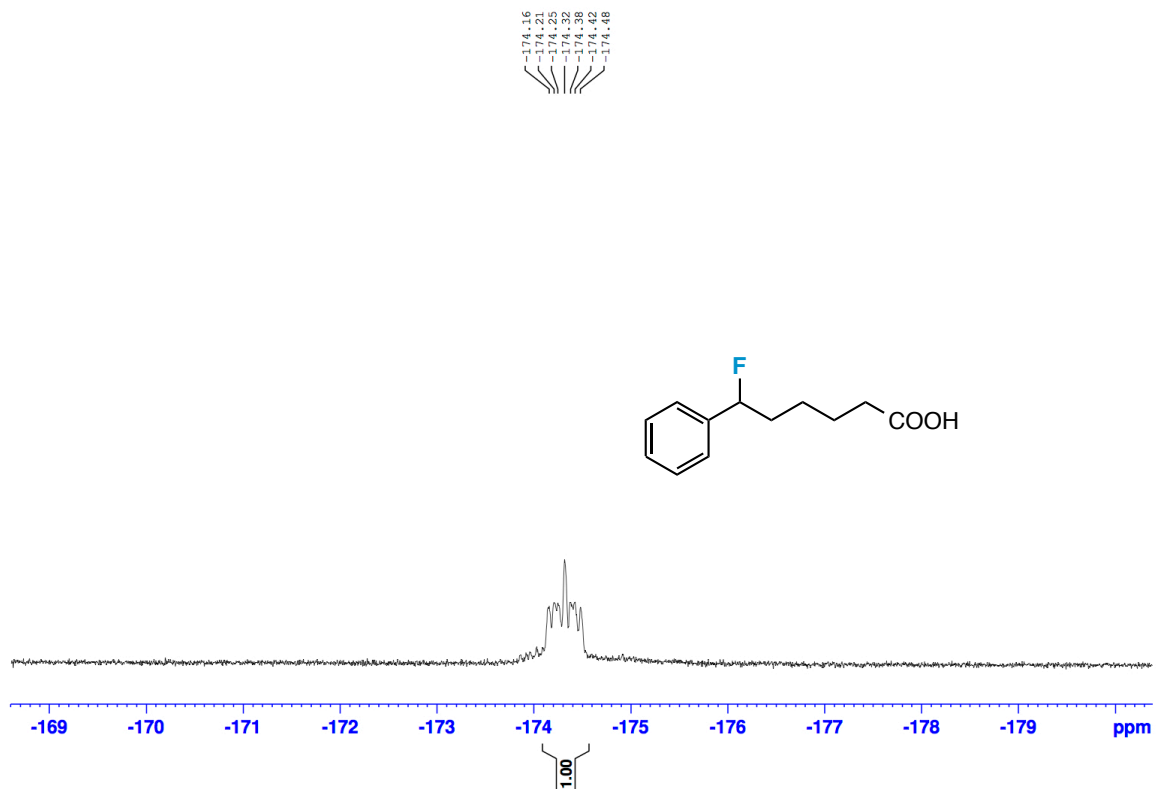

1,4-dioxaspiro[4.5]decane radical cation

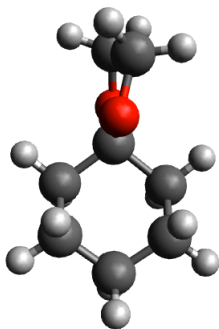


---

```
# opt b3pw91/6-311++g(d,p) scrf=(solvent=acetonitrile) maxdisk=24GB
geom=connectivity
```

---

| Center<br>Number | Atomic<br>Number | Atomic<br>Type | Coordinates (Angstroms) |           |           |
|------------------|------------------|----------------|-------------------------|-----------|-----------|
|                  |                  |                | X                       | Y         | Z         |
| 1                | 6                | 0              | -2.666077               | -0.035271 | 0.062408  |
| 2                | 6                | 0              | -1.798623               | -1.290812 | 0.120762  |
| 3                | 6                | 0              | -0.556771               | -1.183402 | -0.717397 |
| 4                | 6                | 0              | 0.373327                | 0.084645  | -0.243229 |
| 5                | 6                | 0              | -0.596470               | 1.347584  | -0.358578 |
| 6                | 6                | 0              | -1.841500               | 1.181860  | 0.476871  |
| 7                | 1                | 0              | 0.121133                | -2.032470 | -0.612592 |
| 8                | 1                | 0              | -1.540827               | -1.543246 | 1.153315  |
| 9                | 1                | 0              | -2.365924               | -2.142526 | -0.282435 |
| 10               | 1                | 0              | -3.047566               | 0.104361  | -0.955052 |
| 11               | 1                | 0              | -3.530221               | -0.146002 | 0.720725  |
| 12               | 1                | 0              | 0.033418                | 2.176940  | -0.026869 |
| 13               | 1                | 0              | -0.813181               | 1.457548  | -1.422321 |
| 14               | 1                | 0              | -1.582609               | 1.134322  | 1.538876  |
| 15               | 1                | 0              | -2.440209               | 2.091485  | 0.336279  |
| 16               | 1                | 0              | -0.758335               | -0.989142 | -1.771884 |
| 17               | 8                | 0              | 1.419318                | 0.190894  | -1.094481 |
| 18               | 8                | 0              | 0.802921                | -0.098619 | 1.026287  |
| 19               | 6                | 0              | 2.651997                | 0.201547  | -0.336963 |
| 20               | 1                | 0              | 2.992306                | 1.238622  | -0.285460 |
| 21               | 1                | 0              | 3.380599                | -0.406526 | -0.869091 |
| 22               | 6                | 0              | 2.224364                | -0.367151 | 1.007346  |
| 23               | 1                | 0              | 2.361602                | -1.447947 | 1.090077  |
| 24               | 1                | 0              | 2.670427                | 0.132378  | 1.864656  |

---

6-methyl-1,4-dioxaspiro[4.5]decane radical cation

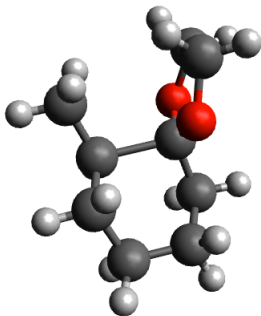

-----  
# opt b3pw91/6-311++g(d,p) scrf=(solvent=acetonitrile) maxdisk=24GB  
geom=connectivity  
-----

| Center<br>Number | Atomic<br>Number | Atomic<br>Type | Coordinates (Angstroms) |           |           |
|------------------|------------------|----------------|-------------------------|-----------|-----------|
|                  |                  |                | X                       | Y         | Z         |
| 1                | 6                | 0              | -2.703666               | -0.010994 | 0.094993  |
| 2                | 6                | 0              | -2.013276               | -1.364263 | 0.236053  |
| 3                | 6                | 0              | -0.769642               | -1.458675 | -0.632234 |
| 4                | 6                | 0              | 0.344633                | -0.501453 | -0.243330 |
| 5                | 6                | 0              | -0.545586               | 1.208064  | -0.477392 |
| 6                | 6                | 0              | -1.748210               | 1.134313  | 0.407989  |
| 7                | 1                | 0              | -0.302103               | -2.447315 | -0.544885 |
| 8                | 1                | 0              | -1.748681               | -1.552251 | 1.281525  |
| 9                | 1                | 0              | -2.695529               | -2.164071 | -0.065175 |
| 10               | 1                | 0              | -3.088269               | 0.102877  | -0.925168 |
| 11               | 1                | 0              | -3.564866               | 0.039348  | 0.765991  |
| 12               | 1                | 0              | -0.746839               | 1.060397  | -1.540107 |
| 13               | 1                | 0              | -1.440732               | 1.126841  | 1.459442  |
| 14               | 1                | 0              | -2.268560               | 2.094531  | 0.256125  |
| 15               | 1                | 0              | -0.996600               | -1.296916 | -1.688147 |
| 16               | 8                | 0              | 1.375981                | -0.439361 | -1.087071 |
| 17               | 8                | 0              | 0.731218                | -0.527175 | 1.032085  |
| 18               | 6                | 0              | 2.616745                | -0.358502 | -0.339373 |
| 19               | 1                | 0              | 3.170298                | 0.512887  | -0.684585 |
| 20               | 1                | 0              | 3.177700                | -1.267374 | -0.556319 |
| 21               | 6                | 0              | 2.153742                | -0.257760 | 1.114276  |
| 22               | 1                | 0              | 2.586539                | -1.014939 | 1.765187  |
| 23               | 1                | 0              | 2.290776                | 0.730654  | 1.550933  |
| 24               | 6                | 0              | 0.453250                | 2.280453  | -0.196574 |
| 25               | 1                | 0              | 1.353052                | 2.194603  | -0.806295 |
| 26               | 1                | 0              | -0.020706               | 3.231452  | -0.477251 |
| 27               | 1                | 0              | 0.708986                | 2.354464  | 0.862176  |

-----

6-phenyl-1,4-dioxaspiro[4.5]decane

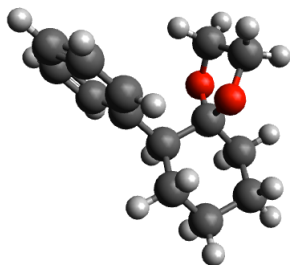

-----  
 # opt b3pw91/6-311++g(d,p) scrf=(solvent=acetonitrile) maxdisk=24GB  
 geom=connectivity  
 -----

| Center<br>Number | Atomic<br>Number | Atomic<br>Type | Coordinates (Angstroms) |           |           |
|------------------|------------------|----------------|-------------------------|-----------|-----------|
|                  |                  |                | X                       | Y         | Z         |
| 1                | 6                | 0              | 0.977598                | -1.940150 | 0.423070  |
| 2                | 6                | 0              | 0.351431                | -0.822385 | -0.427506 |
| 3                | 6                | 0              | 1.168596                | 0.481485  | -0.284160 |
| 4                | 6                | 0              | 2.636483                | 0.245303  | -0.635799 |
| 5                | 6                | 0              | 3.254634                | -0.885417 | 0.185125  |
| 6                | 6                | 0              | 2.442259                | -2.172259 | 0.055517  |
| 7                | 1                | 0              | 0.471325                | -1.105937 | -1.480773 |
| 8                | 1                | 0              | 0.904549                | -1.679018 | 1.484617  |
| 9                | 1                | 0              | 0.397933                | -2.858545 | 0.283288  |
| 10               | 1                | 0              | 2.690387                | 0.009653  | -1.705072 |
| 11               | 1                | 0              | 3.177840                | 1.185096  | -0.486336 |
| 12               | 1                | 0              | 4.288858                | -1.049255 | -0.134720 |
| 13               | 1                | 0              | 3.295108                | -0.584693 | 1.238702  |
| 14               | 1                | 0              | 2.502751                | -2.540776 | -0.977312 |
| 15               | 1                | 0              | 2.867082                | -2.955203 | 0.692602  |
| 16               | 8                | 0              | 1.036545                | 0.984236  | 1.041727  |
| 17               | 8                | 0              | 0.660644                | 1.498359  | -1.151342 |
| 18               | 6                | 0              | 0.066724                | 2.518942  | -0.352359 |
| 19               | 1                | 0              | -1.003717               | 2.327289  | -0.217770 |
| 20               | 1                | 0              | 0.210388                | 3.479097  | -0.850915 |
| 21               | 6                | 0              | 0.823008                | 2.389538  | 0.954888  |
| 22               | 1                | 0              | 1.778577                | 2.927981  | 0.924151  |
| 23               | 1                | 0              | 0.254944                | 2.707361  | 1.830290  |
| 24               | 6                | 0              | -1.129275               | -0.633425 | -0.185224 |
| 25               | 6                | 0              | -2.009198               | -0.576705 | -1.270961 |
| 26               | 6                | 0              | -1.665808               | -0.519190 | 1.102579  |
| 27               | 6                | 0              | -3.378460               | -0.403730 | -1.083825 |
| 28               | 1                | 0              | -1.614512               | -0.669296 | -2.278887 |
| 29               | 6                | 0              | -3.034247               | -0.347582 | 1.295224  |
| 30               | 1                | 0              | -1.008113               | -0.556995 | 1.963138  |
| 31               | 6                | 0              | -3.896960               | -0.287287 | 0.203094  |
| 32               | 1                | 0              | -4.039856               | -0.363708 | -1.943848 |
| 33               | 1                | 0              | -3.428128               | -0.261337 | 2.303375  |
| 34               | 1                | 0              | -4.963640               | -0.155305 | 0.354404  |

-----



6-phenyl-1,4-dioxaspiro[4.5]decane radical cation

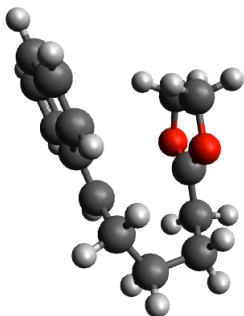

-----  
 # opt b3pw91/6-311++g(d,p) scrf=(solvent=acetonitrile) maxdisk=24GB  
 geom=connectivity  
 -----

| Center Number | Atomic Number | Atomic Type | Coordinates (Angstroms) |           |           |
|---------------|---------------|-------------|-------------------------|-----------|-----------|
|               |               |             | X                       | Y         | Z         |
| 1             | 6             | 0           | 1.085559                | -2.146509 | 0.315723  |
| 2             | 6             | 0           | 0.179984                | -1.415871 | -0.617412 |
| 3             | 6             | 0           | 1.547303                | 1.149616  | -0.152635 |
| 4             | 6             | 0           | 2.765200                | 0.462220  | -0.619161 |
| 5             | 6             | 0           | 3.251255                | -0.721059 | 0.224974  |
| 6             | 6             | 0           | 2.569900                | -2.061988 | -0.052590 |
| 7             | 1             | 0           | 0.504028                | -1.326455 | -1.652911 |
| 8             | 1             | 0           | 0.942688                | -1.812393 | 1.350316  |
| 9             | 1             | 0           | 0.795383                | -3.209878 | 0.315904  |
| 10            | 1             | 0           | 2.630177                | 0.209840  | -1.673025 |
| 11            | 1             | 0           | 3.521560                | 1.262528  | -0.598761 |
| 12            | 1             | 0           | 4.318177                | -0.829389 | 0.014663  |
| 13            | 1             | 0           | 3.175032                | -0.468708 | 1.287068  |
| 14            | 1             | 0           | 2.698784                | -2.326366 | -1.109292 |
| 15            | 1             | 0           | 3.111039                | -2.822711 | 0.518219  |
| 16            | 8             | 0           | 1.232600                | 1.212690  | 1.088861  |
| 17            | 8             | 0           | 0.828889                | 1.848652  | -0.953910 |
| 18            | 6             | 0           | -0.190467               | 2.571940  | -0.181810 |
| 19            | 1             | 0           | -1.157447               | 2.282928  | -0.584517 |
| 20            | 1             | 0           | -0.001520               | 3.631913  | -0.332669 |
| 21            | 6             | 0           | 0.062762                | 2.088631  | 1.246848  |
| 22            | 1             | 0           | 0.351644                | 2.875645  | 1.938652  |
| 23            | 1             | 0           | -0.736065               | 1.476798  | 1.657756  |
| 24            | 6             | 0           | -1.146269               | -1.005234 | -0.332293 |
| 25            | 6             | 0           | -1.940159               | -0.425953 | -1.361088 |
| 26            | 6             | 0           | -1.744206               | -1.148856 | 0.949311  |
| 27            | 6             | 0           | -3.236662               | -0.009415 | -1.119118 |
| 28            | 1             | 0           | -1.511489               | -0.316612 | -2.352958 |
| 29            | 6             | 0           | -3.044018               | -0.728430 | 1.179028  |
| 30            | 1             | 0           | -1.181371               | -1.599324 | 1.759336  |
| 31            | 6             | 0           | -3.799604               | -0.153781 | 0.153310  |
| 32            | 1             | 0           | -3.820046               | 0.428233  | -1.922850 |
| 33            | 1             | 0           | -3.479116               | -0.851064 | 2.165776  |
| 34            | 1             | 0           | -4.816838               | 0.172418  | 0.341153  |

-----

6-(4-(*tert*-butyl)phenyl)-1,4-dioxaspiro[4.5]decane

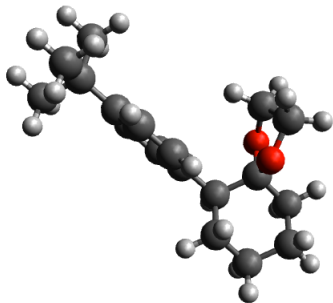


---

# opt b3pw91/6-311++g(d,p) scrf=(solvent=acetonitrile) maxdisk=24GB  
geom=connectivity

---

| Center<br>Number | Atomic<br>Number | Atomic<br>Type | Coordinates (Angstroms) |           |           |
|------------------|------------------|----------------|-------------------------|-----------|-----------|
|                  |                  |                | X                       | Y         | Z         |
| 1                | 6                | 0              | 2.222395                | -1.952142 | 0.418056  |
| 2                | 6                | 0              | 1.639768                | -0.824521 | -0.449803 |
| 3                | 6                | 0              | 2.456621                | 0.473357  | -0.257351 |
| 4                | 6                | 0              | 3.937789                | 0.233403  | -0.545021 |
| 5                | 6                | 0              | 4.512956                | -0.907234 | 0.293202  |
| 6                | 6                | 0              | 3.701164                | -2.188815 | 0.115870  |
| 7                | 1                | 0              | 1.806517                | -1.099192 | -1.499276 |
| 8                | 1                | 0              | 2.102428                | -1.698672 | 1.477202  |
| 9                | 1                | 0              | 1.645290                | -2.866528 | 0.244997  |
| 10               | 1                | 0              | 4.038942                | 0.006504  | -1.612832 |
| 11               | 1                | 0              | 4.476413                | 1.169093  | -0.363227 |
| 12               | 1                | 0              | 5.559942                | -1.073671 | 0.019362  |
| 13               | 1                | 0              | 4.506871                | -0.615256 | 1.350072  |
| 14               | 1                | 0              | 3.807192                | -2.548722 | -0.916355 |
| 15               | 1                | 0              | 4.093172                | -2.979212 | 0.764778  |
| 16               | 8                | 0              | 2.268533                | 0.963139  | 1.067057  |
| 17               | 8                | 0              | 1.994014                | 1.503014  | -1.135083 |
| 18               | 6                | 0              | 1.365438                | 2.514990  | -0.351901 |
| 19               | 1                | 0              | 0.290309                | 2.321922  | -0.266359 |
| 20               | 1                | 0              | 1.531149                | 3.480385  | -0.833217 |
| 21               | 6                | 0              | 2.063417                | 2.369885  | 0.985629  |
| 22               | 1                | 0              | 3.020978                | 2.905522  | 1.001773  |
| 23               | 1                | 0              | 1.458778                | 2.681188  | 1.838645  |
| 24               | 6                | 0              | 0.150943                | -0.629776 | -0.273727 |
| 25               | 6                | 0              | -0.680870               | -0.528690 | -1.393460 |
| 26               | 6                | 0              | -0.456673               | -0.548930 | 0.980142  |
| 27               | 6                | 0              | -2.052634               | -0.347059 | -1.265123 |
| 28               | 1                | 0              | -0.245066               | -0.592621 | -2.386933 |
| 29               | 6                | 0              | -1.833875               | -0.370412 | 1.107943  |
| 30               | 1                | 0              | 0.147627                | -0.618382 | 1.877782  |
| 31               | 6                | 0              | -2.667298               | -0.263147 | -0.008698 |
| 32               | 1                | 0              | -2.651196               | -0.273434 | -2.168013 |
| 33               | 1                | 0              | -2.252065               | -0.315356 | 2.106551  |
| 34               | 6                | 0              | -4.182596               | -0.058974 | 0.094453  |
| 35               | 6                | 0              | -4.669044               | -0.040214 | 1.548354  |
| 36               | 1                | 0              | -4.447917               | -0.979943 | 2.063676  |
| 37               | 1                | 0              | -4.219758               | 0.778134  | 2.119143  |
| 38               | 1                | 0              | -5.753824               | 0.100834  | 1.568275  |
| 39               | 6                | 0              | -4.907605               | -1.201966 | -0.640644 |
| 40               | 1                | 0              | -4.661772               | -2.170886 | -0.195064 |
| 41               | 1                | 0              | -5.991906               | -1.063713 | -0.576203 |
| 42               | 1                | 0              | -4.638958               | -1.239562 | -1.699687 |
| 43               | 6                | 0              | -4.558169               | 1.284419  | -0.558965 |
| 44               | 1                | 0              | -4.063350               | 2.117281  | -0.049719 |
| 45               | 1                | 0              | -4.270582               | 1.314984  | -1.613416 |
| 46               | 1                | 0              | -5.639962               | 1.445037  | -0.501487 |

---

6-(4-(*tert*-butyl)phenyl)-1,4-dioxaspiro[4.5]decane radical cation

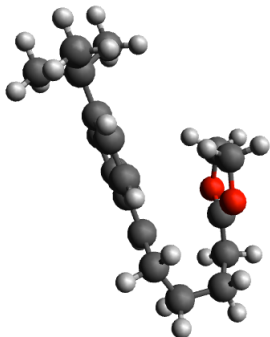


---

# opt b3pw91/6-311++g(d,p) scrf=(solvent=acetonitrile) maxdisk=24GB  
geom=connectivity

---

| Center Number | Atomic Number | Atomic Type | Coordinates (Angstroms) |           |           |
|---------------|---------------|-------------|-------------------------|-----------|-----------|
|               |               |             | X                       | Y         | Z         |
| 1             | 6             | 0           | 2.405375                | -2.101720 | 0.347393  |
| 2             | 6             | 0           | 1.517962                | -1.411079 | -0.633266 |
| 3             | 6             | 0           | 2.739672                | 1.175805  | -0.117374 |
| 4             | 6             | 0           | 4.015846                | 0.558761  | -0.524245 |
| 5             | 6             | 0           | 4.521332                | -0.604694 | 0.335016  |
| 6             | 6             | 0           | 3.899608                | -1.970922 | 0.040491  |
| 7             | 1             | 0           | 1.889333                | -1.307147 | -1.651310 |
| 8             | 1             | 0           | 2.207087                | -1.757303 | 1.369728  |
| 9             | 1             | 0           | 2.149942                | -3.173937 | 0.352297  |
| 10            | 1             | 0           | 3.948711                | 0.310264  | -1.585612 |
| 11            | 1             | 0           | 4.726053                | 1.398149  | -0.459248 |
| 12            | 1             | 0           | 5.597768                | -0.671143 | 0.157896  |
| 13            | 1             | 0           | 4.402335                | -0.354466 | 1.393782  |
| 14            | 1             | 0           | 4.079887                | -2.237339 | -1.008199 |
| 15            | 1             | 0           | 4.443143                | -2.708495 | 0.638781  |
| 16            | 8             | 0           | 2.358661                | 1.216896  | 1.107309  |
| 17            | 8             | 0           | 2.035415                | 1.853327  | -0.950736 |
| 18            | 6             | 0           | 0.952682                | 2.531791  | -0.226973 |
| 19            | 1             | 0           | 0.018592                | 2.222970  | -0.688049 |
| 20            | 1             | 0           | 1.118094                | 3.599541  | -0.348928 |
| 21            | 6             | 0           | 1.138352                | 2.029823  | 1.205543  |
| 22            | 1             | 0           | 1.341375                | 2.814356  | 1.929973  |
| 23            | 1             | 0           | 0.346968                | 1.369411  | 1.550520  |
| 24            | 6             | 0           | 0.158386                | -1.078285 | -0.417467 |
| 25            | 6             | 0           | -0.621057               | -0.535147 | -1.475806 |
| 26            | 6             | 0           | -0.503752               | -1.265155 | 0.822245  |
| 27            | 6             | 0           | -1.947233               | -0.200698 | -1.295973 |
| 28            | 1             | 0           | -0.156297               | -0.387198 | -2.446501 |
| 29            | 6             | 0           | -1.838058               | -0.924369 | 0.984991  |
| 30            | 1             | 0           | 0.034279                | -1.689638 | 1.663019  |
| 31            | 6             | 0           | -2.599554               | -0.381839 | -0.060006 |
| 32            | 1             | 0           | -2.494610               | 0.208536  | -2.139078 |
| 33            | 1             | 0           | -2.292609               | -1.092562 | 1.954163  |
| 34            | 6             | 0           | -4.073040               | -0.001589 | 0.091213  |
| 35            | 6             | 0           | -4.602094               | -0.274184 | 1.504283  |
| 36            | 1             | 0           | -4.534469               | -1.333797 | 1.768233  |
| 37            | 1             | 0           | -4.062758               | 0.304436  | 2.260341  |
| 38            | 1             | 0           | -5.656117               | 0.013105  | 1.559180  |
| 39            | 6             | 0           | -4.913989               | -0.821097 | -0.907097 |
| 40            | 1             | 0           | -4.809686               | -1.893662 | -0.717136 |
| 41            | 1             | 0           | -5.972507               | -0.559700 | -0.808686 |
| 42            | 1             | 0           | -4.618191               | -0.630473 | -1.942065 |
| 43            | 6             | 0           | -4.245631               | 1.499918  | -0.208664 |
| 44            | 1             | 0           | -3.665596               | 2.107102  | 0.493049  |
| 45            | 1             | 0           | -3.923392               | 1.752153  | -1.222335 |
| 46            | 1             | 0           | -5.298782               | 1.783139  | -0.112228 |

6-(4-chlorophenyl)-1,4-dioxaspiro[4.5]decane

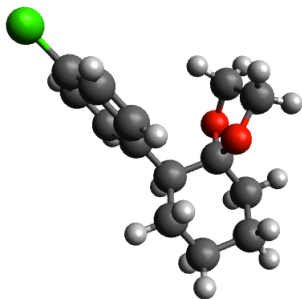

-----  
 # opt b3pw91/6-311++g(d,p) scrf=(solvent=acetonitrile) maxdisk=24GB  
 geom=connectivity  
 -----

| Center Number | Atomic Number | Atomic Type | Coordinates (Angstroms) |           |           |
|---------------|---------------|-------------|-------------------------|-----------|-----------|
|               |               |             | X                       | Y         | Z         |
| 1             | 6             | 0           | -3.102369               | -2.181054 | -0.118911 |
| 2             | 6             | 0           | -3.911395               | -0.896500 | -0.286940 |
| 3             | 6             | 0           | -3.331392               | 0.238312  | 0.555985  |
| 4             | 6             | 0           | -1.850968               | 0.477244  | 0.264726  |
| 5             | 6             | 0           | -1.037837               | -0.824612 | 0.446278  |
| 6             | 6             | 0           | -1.624204               | -1.947103 | -0.425842 |
| 7             | 1             | 0           | -3.868776               | 1.175978  | 0.381345  |
| 8             | 1             | 0           | -3.907909               | -0.598786 | -1.342172 |
| 9             | 1             | 0           | -4.957756               | -1.062120 | -0.010675 |
| 10            | 1             | 0           | -3.205387               | -2.546355 | 0.911601  |
| 11            | 1             | 0           | -3.497982               | -2.967008 | -0.770776 |
| 12            | 1             | 0           | -1.197913               | -1.105132 | 1.494701  |
| 13            | 1             | 0           | -1.508128               | -1.688863 | -1.484254 |
| 14            | 1             | 0           | -1.048607               | -2.863427 | -0.258839 |
| 15            | 1             | 0           | -3.429316               | 0.006025  | 1.622855  |
| 16            | 8             | 0           | -1.663279               | 0.973390  | -1.056255 |
| 17            | 8             | 0           | -1.378936               | 1.497783  | 1.147812  |
| 18            | 6             | 0           | -1.476032               | 2.382571  | -0.966442 |
| 19            | 6             | 0           | -0.772667               | 2.526967  | 0.368481  |
| 20            | 1             | 0           | -0.879805               | 2.706668  | -1.820408 |
| 21            | 1             | 0           | -2.440511               | 2.905410  | -0.974362 |
| 22            | 1             | 0           | 0.305153                | 2.353067  | 0.275208  |
| 23            | 1             | 0           | -0.950547               | 3.485673  | 0.858581  |
| 24            | 6             | 0           | 0.449011                | -0.627744 | 0.261403  |
| 25            | 6             | 0           | 1.286417                | -0.555700 | 1.377967  |
| 26            | 6             | 0           | 1.034994                | -0.516155 | -1.003920 |
| 27            | 6             | 0           | 2.660144                | -0.371218 | 1.251585  |
| 28            | 1             | 0           | 0.859817                | -0.644382 | 2.372470  |
| 29            | 6             | 0           | 2.406079                | -0.332973 | -1.153597 |
| 30            | 1             | 0           | 0.416563                | -0.564010 | -1.892108 |
| 31            | 6             | 0           | 3.205765                | -0.259763 | -0.020044 |
| 32            | 1             | 0           | 3.294235                | -0.317700 | 2.128876  |
| 33            | 1             | 0           | 2.846232                | -0.247576 | -2.140391 |
| 34            | 17            | 0           | 4.935005                | -0.027675 | -0.199323 |

-----

6-(4-chlorophenyl)-1,4-dioxaspiro[4.5]decane radical cation

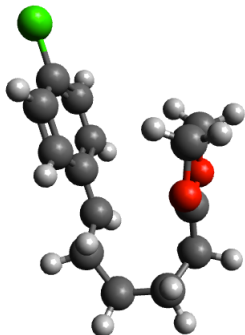


---

# opt b3pw91/6-311++g(d,p) scrf=(solvent=acetonitrile) maxdisk=24GB  
geom=connectivity

---

| Center Number | Atomic Number | Atomic Type | Coordinates (Angstroms) |           |           |
|---------------|---------------|-------------|-------------------------|-----------|-----------|
|               |               |             | X                       | Y         | Z         |
| 1             | 6             | 0           | -2.217747               | 1.171814  | 0.161298  |
| 2             | 6             | 0           | -1.755079               | -2.111806 | -0.405629 |
| 3             | 6             | 0           | -3.920388               | -0.681387 | -0.284085 |
| 4             | 6             | 0           | -3.245548               | -2.035790 | -0.059860 |
| 5             | 6             | 0           | -3.433315               | 0.467500  | 0.607045  |
| 6             | 6             | 0           | -0.862933               | -1.451888 | 0.591050  |
| 7             | 1             | 0           | -1.586245               | -1.714080 | -1.414143 |
| 8             | 1             | 0           | -3.841044               | -0.386723 | -1.334911 |
| 9             | 1             | 0           | -3.392787               | -2.350184 | 0.980528  |
| 10            | 1             | 0           | -3.296239               | 0.175933  | 1.650318  |
| 11            | 1             | 0           | -1.225854               | -1.384913 | 1.614860  |
| 12            | 1             | 0           | -1.474598               | -3.175789 | -0.468763 |
| 13            | 1             | 0           | -4.988104               | -0.795049 | -0.081049 |
| 14            | 1             | 0           | -3.780431               | -2.765600 | -0.675060 |
| 15            | 1             | 0           | -4.190188               | 1.267430  | 0.617901  |
| 16            | 8             | 0           | -1.481867               | 1.825969  | 0.983338  |
| 17            | 8             | 0           | -1.914658               | 1.282444  | -1.079155 |
| 18            | 6             | 0           | 0.484047                | -1.077146 | 0.373983  |
| 19            | 6             | 0           | 3.164694                | -0.306928 | 0.024665  |
| 20            | 6             | 0           | 1.132786                | -1.206122 | -0.884113 |
| 21            | 6             | 0           | 1.253652                | -0.551858 | 1.448808  |
| 22            | 6             | 0           | 2.570386                | -0.170618 | 1.281016  |
| 23            | 6             | 0           | 2.451873                | -0.826419 | -1.055978 |
| 24            | 1             | 0           | 0.595249                | -1.615671 | -1.731675 |
| 25            | 1             | 0           | 0.792697                | -0.451531 | 2.426420  |
| 26            | 1             | 0           | 3.139822                | 0.226816  | 2.113020  |
| 27            | 1             | 0           | 2.932107                | -0.933978 | -2.021633 |
| 28            | 6             | 0           | -0.746163               | 2.163198  | -1.215619 |
| 29            | 1             | 0           | -1.050227               | 2.989677  | -1.852718 |
| 30            | 1             | 0           | 0.039348                | 1.576153  | -1.684111 |
| 31            | 6             | 0           | -0.455219               | 2.562326  | 0.232029  |
| 32            | 1             | 0           | 0.510169                | 2.227020  | 0.602052  |
| 33            | 1             | 0           | -0.611224               | 3.617463  | 0.442070  |
| 34            | 17            | 0           | 4.827851                | 0.173910  | -0.194366 |

---

6-(4-(trifluoromethyl)phenyl)-1,4-dioxaspiro[4.5]decane

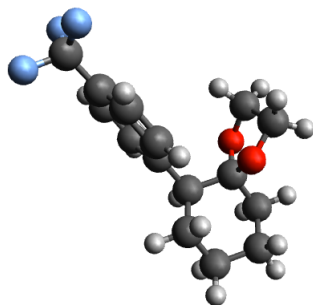

-----  
 # opt b3pw91/6-311++g(d,p) scrf=(solvent=acetonitrile) maxdisk=24GB  
 geom=connectivity  
 -----

| Center<br>Number | Atomic<br>Number | Atomic<br>Type | Coordinates (Angstroms) |           |           |
|------------------|------------------|----------------|-------------------------|-----------|-----------|
|                  |                  |                | X                       | Y         | Z         |
| 1                | 6                | 0              | -2.164963               | -1.956952 | -0.424576 |
| 2                | 6                | 0              | -1.601343               | -0.828291 | 0.454937  |
| 3                | 6                | 0              | -2.421690               | 0.467490  | 0.259429  |
| 4                | 6                | 0              | -3.903561               | 0.215956  | 0.531825  |
| 5                | 6                | 0              | -4.462359               | -0.925067 | -0.317054 |
| 6                | 6                | 0              | -3.644953               | -2.202552 | -0.136252 |
| 7                | 1                | 0              | -1.772811               | -1.108191 | 1.501515  |
| 8                | 1                | 0              | -2.037466               | -1.698231 | -1.481407 |
| 9                | 1                | 0              | -1.583929               | -2.868134 | -0.248936 |
| 10               | 1                | 0              | -4.013577               | -0.015077 | 1.597736  |
| 11               | 1                | 0              | -4.446422               | 1.148712  | 0.348312  |
| 12               | 1                | 0              | -5.510799               | -1.099298 | -0.054517 |
| 13               | 1                | 0              | -4.447306               | -0.628820 | -1.372577 |
| 14               | 1                | 0              | -3.758390               | -2.567459 | 0.893226  |
| 15               | 1                | 0              | -4.024959               | -2.992614 | -0.792312 |
| 16               | 8                | 0              | -2.219964               | 0.961647  | -1.059420 |
| 17               | 8                | 0              | -1.968439               | 1.492799  | 1.146651  |
| 18               | 6                | 0              | -1.372975               | 2.532792  | 0.372731  |
| 19               | 1                | 0              | -0.290944               | 2.379699  | 0.292814  |
| 20               | 1                | 0              | -1.574580               | 3.488506  | 0.859388  |
| 21               | 6                | 0              | -2.057315               | 2.374169  | -0.970523 |
| 22               | 1                | 0              | -3.030115               | 2.880760  | -0.991754 |
| 23               | 1                | 0              | -1.455850               | 2.705918  | -1.817735 |
| 24               | 6                | 0              | -0.114903               | -0.617763 | 0.288622  |
| 25               | 6                | 0              | 0.707010                | -0.540581 | 1.417146  |
| 26               | 6                | 0              | 0.482168                | -0.497512 | -0.971279 |
| 27               | 6                | 0              | 2.077540                | -0.342909 | 1.302624  |
| 28               | 1                | 0              | 0.266397                | -0.634160 | 2.404676  |
| 29               | 6                | 0              | 1.851153                | -0.300520 | -1.099386 |
| 30               | 1                | 0              | -0.128161               | -0.547454 | -1.864449 |
| 31               | 6                | 0              | 2.650711                | -0.217417 | 0.039294  |
| 32               | 1                | 0              | 2.693525                | -0.283258 | 2.192710  |
| 33               | 1                | 0              | 2.293696                | -0.204767 | -2.084456 |
| 34               | 6                | 0              | 4.131959                | -0.054884 | -0.098808 |
| 35               | 9                | 0              | 4.476254                | 0.631523  | -1.208421 |
| 36               | 9                | 0              | 4.773123                | -1.249525 | -0.181697 |
| 37               | 9                | 0              | 4.682850                | 0.592730  | 0.948734  |

-----

6-(4-(trifluoromethyl)phenyl)-1,4-dioxaspiro[4.5]decane

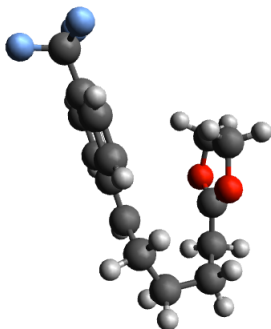

-----  
 # opt b3pw91/6-311++g(d,p) scrf=(solvent=acetonitrile) maxdisk=24GB  
 geom=connectivity  
 -----

| Center Number | Atomic Number | Atomic Type | Coordinates (Angstroms) |           |           |
|---------------|---------------|-------------|-------------------------|-----------|-----------|
|               |               |             | X                       | Y         | Z         |
| 1             | 6             | 0           | -2.302695               | -2.136108 | -0.407976 |
| 2             | 6             | 0           | -1.412729               | -1.493454 | 0.600359  |
| 3             | 6             | 0           | -2.796119               | 1.182884  | 0.154984  |
| 4             | 6             | 0           | -4.004498               | 0.456534  | 0.583362  |
| 5             | 6             | 0           | -4.466825               | -0.694954 | -0.318757 |
| 6             | 6             | 0           | -3.796606               | -2.049356 | -0.078502 |
| 7             | 1             | 0           | -1.784608               | -1.427666 | 1.621045  |
| 8             | 1             | 0           | -2.117467               | -1.738932 | -1.413441 |
| 9             | 1             | 0           | -2.031443               | -3.202613 | -0.469623 |
| 10            | 1             | 0           | -3.873823               | 0.162496  | 1.626858  |
| 11            | 1             | 0           | -4.773558               | 1.244634  | 0.590857  |
| 12            | 1             | 0           | -5.538398               | -0.811751 | -0.139717 |
| 13            | 1             | 0           | -4.365448               | -0.401085 | -1.367816 |
| 14            | 1             | 0           | -3.957351               | -2.358394 | 0.961380  |
| 15            | 1             | 0           | -4.326690               | -2.780431 | -0.696197 |
| 16            | 8             | 0           | -2.478736               | 1.304147  | -1.079883 |
| 17            | 8             | 0           | -2.069314               | 1.827020  | 0.991478  |
| 18            | 6             | 0           | -1.034875               | 2.573057  | 0.259409  |
| 19            | 1             | 0           | -0.073780               | 2.230454  | 0.634050  |
| 20            | 1             | 0           | -1.191078               | 3.625266  | 0.483113  |
| 21            | 6             | 0           | -1.314292               | 2.194369  | -1.196113 |
| 22            | 1             | 0           | -1.620016               | 3.028281  | -1.822571 |
| 23            | 1             | 0           | -0.522940               | 1.618871  | -1.669071 |
| 24            | 6             | 0           | -0.066202               | -1.112251 | 0.394039  |
| 25            | 6             | 0           | 0.692577                | -0.590442 | 1.478541  |
| 26            | 6             | 0           | 0.588482                | -1.231935 | -0.861609 |
| 27            | 6             | 0           | 2.007647                | -0.206620 | 1.317700  |
| 28            | 1             | 0           | 0.221618                | -0.495557 | 2.451636  |
| 29            | 6             | 0           | 1.906972                | -0.848458 | -1.017724 |
| 30            | 1             | 0           | 0.054971                | -1.635523 | -1.714131 |
| 31            | 6             | 0           | 2.622717                | -0.327343 | 0.064923  |
| 32            | 1             | 0           | 2.561731                | 0.190515  | 2.160648  |
| 33            | 1             | 0           | 2.385100                | -0.950007 | -1.985185 |
| 34            | 6             | 0           | 4.064426                | 0.036223  | -0.092424 |
| 35            | 9             | 0           | 4.377717                | 0.375162  | -1.358981 |
| 36            | 9             | 0           | 4.890322                | -0.989093 | 0.240725  |
| 37            | 9             | 0           | 4.421928                | 1.073847  | 0.693160  |

-----

**Table of calculated C-C bond lengths in radical cation geometries.**

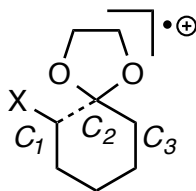

| <i>X</i>                     | $d(C_1-C_2)$ | $d(C_2-C_3)$ |
|------------------------------|--------------|--------------|
| H                            | 1.64         | 1.60         |
| Me                           | 1.94         | 1.52         |
| Ph                           | 2.94         | 1.47         |
| <i>p</i> -tBuPh              | 2.91         | 1.47         |
| <i>p</i> -ClPh               | 2.98         | 1.47         |
| <i>p</i> -CF <sub>3</sub> Ph | 3.06         | 1.47         |

Calculated at B3PW91/6-311++G\*\* (MeCN). Distances reported in Angstroms.
